# Supplementary material
Source: Frontiers journal article supplement (https://www.frontiersin.org/articles/451072)
Supplement: Table_1.xlsx [file Table_1.xlsx]

## Sheet: Sheet1
Sequence	Year	Site	Depth (m)	Date	Diadema #/20m2	Echinomet. viridis	Echinometra lucunter	Tripneustes	Stony Coral %	Juv. Coral density (#/m2)	Gorgo/spong %	Corallines %	Turf %	Turf CH (mm)	Turf AI	Macro %	Macro CH (mm)	Macro AI	Algal index All	Lobophora %	NCC %	Articulated %	Art CH (mm)	Art AI	Orb. annularis	Orb. faveolata	Orb. franksi	Mont. cavernosa	Ag. agaricites	Ag. grahamae	Ag humilis	Ag. lamarkii	Ag. fragilis	P. asteroides	P. porites	Dip. strigosa	Dip. labyrinthefo	Dich. stokeseii	Mil. alcicornis	Mil. Complanata	Sid. siderea	Sid. radians	C. natans	Eus. fastigata	Heleo (Leptoseris)	Madracsi decactus	Madracsi auretenra	Madracsis pheroensis	Dendrogyra cylindrica
1	2004	Barcadera	9.14	2004-03-11					54.58		8.14	4.07	30.51			2.71			0		0	0		0	27.12	14.24	0	0	7.8	1.02	0.68	0	0	0	0	0	0	0	0	0	0	0	1.36	2.37	0	0	0	0	0
2	2004	Barcadera	9.14	2004-03-11					61.04		3.25	1.95	33.12			0.65			0		0	0		0	38.96	0	0	0	1.3	0	0.65	0	0	3.25	0	0	0	0	0	1.3	0	0	11.04	3.9	0	0	0.65	0	0
3	2004	Barcadera	9.14	2004-03-11					39.03		8.18	2.97	49.81			0			0		0	0		0	5.2	20.82	0	0	0	0	2.23	0	0	1.49	0	0	0	0	0	1.49	0	0	4.46	0	0	0	1.49	0	0
4	2004	Barcadera	9.14	2004-03-11					46.93		5.03	0.84	46.93			0.28			0		0	0		0	17.32	11.73	0	0.28	0	0.84	0.56	0	0	0.84	0	0	0.56	0	4.47	0.28	0	0	1.68	0	0	0	6.15	0	0
5	2004	Barcadera	9.14	2004-07-15					56.34		7.32	5.37	25.85			2.68			0		1.95	0.49		0	36.1	9.27	0	1.46	2.44	0	0	0	0	0.73	0	0	0	0	0	0	0	0	0.73	2.2	0	0	3.41	0	0
6	2004	Barcadera	9.14	2004-07-15					47.26		1.9	3.59	42.83			1.05			0		3.16	0.21		0	32.7	0	0	0	1.27	0	0	0	0	1.69	0	0	0	0	0	2.53	0	0	6.54	0	0	0	2.53	0	0
7	2004	Barcadera	9.14	2004-07-15					29.66		5.37	7.06	50.85			2.26			0		3.11	1.69		0	3.95	16.38	0	0	1.41	0	0	0	0	0	0	0	0	0	0	1.13	0	0	4.52	0.28	0	0	1.98	0	0
8	2004	Barcadera	9.14	2004-07-15					36.99		6.39	5.02	46.8			3.2			0		1.37	0.23		0	10.05	13.93	0	0.91	0.46	0	0	0	0	0.23	0	0	0	0	0	5.48	0	0	1.83	0	0	0	4.11	0	0
9	2004	Forest	9.14	2004-03-10					58.24		10.59	6.47	23.53			1.18			0		0	0		0	10	7.65	0	10	0	1.18	0	0	0	0	0	0	0	0	1.76	0	0	0	0	0	0	0	24.71	0	0
10	2004	Forest	9.14	2004-03-10					56.94		2.49	0.83	38.9			0.83			0		0	0		0	2.91	3.74	0	2.91	9.14	0	0	0	0	4.99	0	0	0	0	0	0	0	0	7.48	0	0	0	25.77	0	0
11	2004	Forest	9.14	2004-03-10					52.6		8.12	3.9	32.79			2.6			0		0	0		0	12.01	5.84	0	11.69	0	0.65	0	0	0	1.3	0.65	0	9.42	0	1.3	0	0	0	0	0	0	0	9.74	0	0
12	2004	Forest	9.14	2004-03-10					50.74		5.93	2.22	39.63			1.11			0		0	0.37		0	10.37	7.41	0	10	1.85	0	0	0	0	1.11	2.59	0	2.22	0	7.41	0	0	0	0	1.11	0	0	6.67	0	0
13	2004	Forest	9.14	2004-07-17					50.99		10.48	5.1	31.73			0.85			0		0.57	0.28		0	20.68	2.27	0	7.37	0.85	0	0	0	0	1.42	0	0	0	0	0	0.85	2.55	0	0	0	0	0	14.45	0	0
14	2004	Forest	9.14	2004-07-17					52.7		5.17	6.36	35.77			0			0		0	0		0	4.77	1.59	0	0	9.54	0	0	1.59	0	0	4.37	0	0.79	0	0	5.56	0.79	0	3.18	0.24	0	0	20.27	0	0
15	2004	Forest	9.14	2004-07-17					47.34		5.57	8.1	35.19			2.53			0		0.76	0.51		0	17.47	0.51	3.54	2.53	1.77	0	0	0	0	2.53	0.76	0	0	0	0	1.52	0	0	6.84	1.01	0	0	7.85	0	0
16	2004	Forest	9.14	2004-07-17					51.34		4.62	6.08	32.6			3.16			0		2.19	0		0	10.95	4.87	0	9	3.16	0	0	0	0	0.97	0.49	0	2.43	0	0.49	6.81	0	0	3.65	1.46	0	0	6.08	0	0
17	2004	Karpata	9.14	2004-03-10					54.71	32	11.18	0.88	29.71			2.94			0		0.59	0		0	23.53	16.47	2.35	0.59	0	1.76	0.59	0	0	0	0.59	0	3.53	0	0	2.35	0	0	0	0.59	0	0	0	0	0
18	2004	Karpata	9.14	2004-03-10					58.86	21	7.14	0.29	32.57			1.14			0		0	0		0	8.57	13.14	0	3.43	3.14	0	0.29	0	0	0.86	0	0	2.29	0.86	0	1.14	0.86	0	14	0	0	0	10.29	0	0
19	2004	Karpata	9.14	2004-03-10					39.56	22	5.38	3.16	41.77			7.59			0		2.53	0		0	22.78	0	0	3.8	1.27	1.27	0	0	0	2.53	0	0	2.53	0	0.95	0	0	0	0	0	0	0	4.43	0	0
20	2004	Karpata	9.14	2004-03-10					43.54	20	5.54	2.9	38.52			5.8			0		3.69	0		0	16.09	7.92	0	0.53	2.64	1.58	0.53	0	0	7.12	0	0	0	0	2.11	0	0	0	2.11	1.06	0	0	1.85	0	0
21	2004	Karpata	9.14	2004-07-16					38.26	22	6.08	10.58	30.18			9.41			0		4.31	1.18		0	15.48	11.37	1.18	2.98	2.16	0	0	0.2	0	1.57	0	0	0	0	0	0	0	0	2.35	0	0.2	0	0.39	0	0
22	2004	Karpata	9.14	2004-07-16					54.33		0.95	6.63	28.87			4.73			0		4.26	0.24		0	13.72	9.23	0	4.26	6.86	0	0	0	0	0.95	0	0	0	0.24	0	3.79	1.42	0	10.88	2.37	0	0	0.14	0	0
23	2004	Karpata	9.14	2004-07-16					35.93		1.72	9.78	41.92			9.58			0		0.88	0.2		0	19.16	0	0	1.6	4.39	0	0	1.6	0	0.2	0	0	0	0	0	2.2	1.2	0	1.6	0	0	0	3.99	0	0
24	2004	Karpata	9.14	2004-07-16					41.67		8.91	11.05	27.33			9.5			0		1.55	0		0	24.81	1.16	0.58	0	0.39	0	0	0.58	0	0.19	0	0	0	0.39	0	3.29	0	0	3.88	1.74	0	0	4.65	0	0
25	2004	18th Palm	9.14	2004-03-09					42.53		15.52	4.02	33.91			4.02			0		0	0		0	2.3	17.82	0	16.09	4.02	0	1.15	0	0	0	0	0	0	0	0	1.15	0	0	0	0	0	0	0	0	0
26	2004	18th Palm	9.14	2004-03-09					34.3		3.25	1.08	60.29			0.72			0		0.36	0		0	8.3	12.27	0	0	5.78	0	0	0	0	0	0	0	0	0	0	6.5	1.44	0	0	0	0	0	0	0	0
27	2004	18th Palm	9.14	2004-03-09					37.43		6.47	1.62	42.61			11.33			0		0.54	0		0	0	26.97	0	3.24	1.08	0	1.62	0	0	1.29	0	0	0	0	0	0	0	0	0	0	0	0	3.24	0	0
28	2004	18th Palm	9.14	2004-03-09					36.22		8.75	1.09	51.75			2.19			0		0	0		0	13.85	0	0	5.1	8.02	0	0	0	0	1.82	0	0	1.46	0	1.09	0	0.73	0	2.19	0.73	0	0	0.51	0	0
29	2004	18th Palm	9.14	2004-07-11					29.29		3.57	4.91	52.41			8.48			0		1.34	0		0	12.95	4.46	0	3.57	2.68	0	0	0	0	4.02	0	0	0	0	0	1.34	0	0	0	0	0	0	0.27	0	0
30	2004	18th Palm	9.14	2004-07-11					23.01		4.6	5.35	50.06			7.46			0		9.51	0		0	5.29	7.15	0	1.87	5.6	0.93	0	0	0	0.31	0	0	0	0	0	1.55	0	0	0	0.31	0	0	0	0	0
31	2004	18th Palm	9.14	2004-07-11					44.1		4.12	4.31	41.23			3.84			0		2.4	0		0	7.19	23.01	0	0	4.79	0	0	0	0	2.4	0	0	1.92	0	0	0	4.79	0	0	0	0	0	0	0	0
32	2004	18th Palm	9.14	2004-07-11					24.06		12.09	4.01	52.01			5.45			0		2.38	0		0	0	0.31	9.09	1.07	3.13	0	0.13	0	0	1.25	0	0	0.94	0	0	0	0	0	1.88	0	0	0	6.27	0	0
33	2004	Reef Scientifico	9.14	2004-03-09					41.03		0.97	1.75	54.8			1.45			0		0	0		0	5.33	17.46	0	9.21	0.48	0.97	0.78	0	0	0	0	0	0	0	0	3.88	0	0	2.91	0	0	0	0	0	0
34	2004	Reef Scientifico	9.14	2004-03-09					39.53		6.72	3.92	47.03			2.8			0		0	0		0	0	17.36	0	3.36	2.24	0	0	0	0	0	0	0	0	0	6.72	0	1.68	0	0	0	0	0	4.48	0	0
35	2004	Reef Scientifico	9.14	2004-03-09					47.57		5.95	0.54	45.41			0.54			0		0	0		0	0	37.3	0	0.54	4.32	0	0	0	0	0	0	0	2.7	0	0	0	0	0	0	0	0	0	2.7	0	0
36	2004	Reef Scientifico	9.14	2004-03-09					34.48		2.96	2.46	59.11			0.99			0		0	0		0	0	24.63	0	0	0	0	0.49	0	0	1.97	0	0	1.97	0	2.96	0.49	0	0	0	0	0	0	0	0	0
37	2004	Reef Scientifico	9.14	2004-07-14					36.41		3.88	3.88	52.91			2.43			0		0.49	0		0	4.37	6.31	0	0	7.77	0	0	3.4	0	2.14	0	0	5.34	0	0	5.34	0	0	0	0	0	0	1.46	0	0
38	2004	Reef Scientifico	9.14	2004-07-14					41.57		5.49	1.18	50.59			1.18			0		0	0		0	10.98	9.02	0	0	1.57	0	0	0	0	1.57	0	0	0	0	3.14	1.96	0	0	12.55	0.39	0	0	0.39	0	0
39	2004	Reef Scientifico	9.14	2004-07-14					38.14		1.27	1.69	55.93			2.97			0		0	0		0	9.32	4.24	0	3.81	9.75	0	0	0	0	2.54	0	0	3.39	0	0	1.69	0	0	0	0.42	0	0	2.97	0	0
40	2004	Reef Scientifico	9.14	2004-07-14					22.24		6.23	2.4	68.06			1.07			0		0	0		0	12.46	0.89	0	0	0.89	0	0	0	0	0	0	0	1.78	0	0	0.89	3.56	0	0	0	0	0	1.78	0	0
41	2004	Windsock	9.14	2004-03-08					70.98		4.78	0.37	22.04			1.84			0		0	0		0	0	66.57	0	0	2.2	0	0	0	0	0	0	0	0	0	0	0	1.1	0	0	0	0	0	1.1	0	0
42	2004	Windsock	9.14	2004-03-08					48.48		0	0.1	50.44			0.98			0		0	0		0	23.51	2.94	0	5.39	1.47	0	0	0	0	5.39	0	0	2.45	0	0	5.88	0.49	0	0	0	0	0	0.98	0	0
43	2004	Windsock	9.14	2004-03-08					37.56		1.91	4.29	54.34			1.91			0		0	0		0	3.81	17.83	0	6.2	0	0	1.91	0	0	5.24	0	0	1.91	0	0	0	0	0	0	0	0.67	0	0	0	0
44	2004	Windsock	9.14	2004-03-08					45.3		3	2.33	47.03			2.33			0		0	0		0	11.34	12.68	0	3.34	4.67	0	0.67	0	0	2.67	0	0	2.67	0	2.33	0	4.67	0	0	0	0	0	0	0	0
45	2004	Windsock	9.14	2004-07-09					46.83		3.17	2.55	39.97			4.64			0		2.37	0.47		0	18.68	15.14	4.4	0	2.37	0	0	0	0	0.14	0	0	0.71	0	0	2.6	0	0	0.95	0	0	0	1.84	0	0
46	2004	Windsock	9.14	2004-07-12					35.92		1.06	3.52	52.11			4.58			0		2.82	0		0	19.37	2.82	0	3.52	0.35	0	0	0	0	1.76	0	0	0	0	0	1.76	0	0	1.76	0	0	0	3.52	0	0
47	2004	Windsock	9.14	2004-07-12					30.64		7.41	5.05	52.86			2.69			0		1.35	0		0	1.01	16.84	0	3.7	3.03	0	0	0	0	0	0	0	0	0	0	0	0	0	0	0	0	0	6.06	0	0
48	2004	Windsock	9.14	2004-07-12					36.49		8.09	5.5	43.63			3.98			0		2.19	0.12		0	13.75	6.37	0	1.39	2.03	0	0	0	0	1.08	0.16	0	1.2	0	0	0.8	2.79	0	3.19	0	0	0	2.79	0	0
49	2005	18th Palm	9.144	2005-03-07	0				53.3333	9.6	0	3.33333	43.3333	0.5	21.6667	0	0	0	21.6667		0	0	0	0	8.33333	23.3333	0	3.33333	6.66667	0	0	0	0	3.33333	0	3.33333	0	0	0	5	0	0	0	0	0	0	0	0	0
50	2005	18th Palm	9.144	2005-03-07	0				42.5743	6.4	1.9802	0	51.4851	0.5	25.7426	3.9604	2	7.92079	33.6634		0	0	0	0	17.8218	13.8614	0	0	3.9604	0	0	0	0	0	0	0	0	0	3.9604	0.990099	1.9802	0	0	0	0	0	0	0	0
51	2005	18th Palm	9.144	2005-03-07	0				43.2432	16	0	0	56.7568	0.5	28.3784	0	0	0	28.3784		0	0	0	0	5.40541	0	13.5135	13.5135	5.40541	0	0	0	0	0	0	0	0	0	0	0	0	0	0	0	0	0	2.7027	0	0
52	2005	18th Palm	9.144	2005-03-07	0				40.3101	16	17.0543	3.10078	37.2093	0.5	18.6047	2.32558	2	4.65116	23.2558		0	0	0	0	15.5039	0	0	7.75194	6.20155	0	0	0	0	0	0	0	3.10078	0	1.55039	1.55039	0	0	3.10078	0	0	0	0	0	0
53	2005	Windsock	9.144	2005-03-08	0				57.971	16	0	0	42.029	1	42.029	0	0	0	42.029		0	0	0	0	34.7826	8.69565	0	0	7.24638	0	0	0	0	2.89855	0	0	0	0	0	2.89855	0	0	0	0	0	0	0	0	0
54	2005	Windsock	9.7536	2005-03-08	0				48.0427	28.8	2.13523	1.77936	48.0427	1	48.0427	0	0	0	48.0427		0	0	0	0	12.4555	14.2349	0	5.33808	7.11744	0	0	0	0	1.77936	0	0	3.55872	0	0	3.55872	0	0	0	0	0	0	0	0	0
55	2005	Windsock	10.3632	2005-03-08	1				43.5484	19.2	0	4.83871	51.6129	2	103.226	0	0	0	103.226		0	0	0	0	29.0323	8.06452	0	0	0	0	0	0	0	0	0	0	0	0	0	0	0	0	6.45161	0	0	0	0	0	0
56	2005	Windsock	10.3632	2005-03-08	1				54.1353	22.4	3.00752	4.51128	37.594	1	37.594	0.75188	10	7.5188	45.1128		0	0	0	0	9.02256	13.5338	0	6.01504	1.50376	0	0	0	0	1.50376	0	0	0	0	0	1.50376	0	0	18.0451	1.50376	0	0	0	0	0
57	2005	Reef Scientifico	9.7536	2005-03-07	2				48.3083	28.8	0	1.8797	48.8722	1	48.8722	0.93985	10	9.3985	58.2707		0	0	0	0	5.6391	6.95489	20.6767	3.7594	3.7594	0	0	0	0	0	0	0	5.6391	0	0	1.8797	0	0	0	0	0	0	0	0	0
58	2005	Reef Scientifico	9.7536	2005-03-07	0				35.4167	22.4	2.08333	2.08333	60.4167	1	60.4167	0	0	0	60.4167		0	0	0	0	0	20.8333	0	2.08333	6.25	0	0	0	0	0	0	0	0	0	0	0	0	0	2.08333	0	0	0	0	0	0
59	2005	Reef Scientifico	9.144	2005-03-07	5				47.5	35.2	11.25	2.5	38.75	1	38.75	0	0	0	38.75		0	0	0	0	21.25	10	0	0	3.75	0	0	0	0	2.5	0	0	0	0	3.75	0	0	0	3.75	0	0	0	0	0	0
60	2005	Reef Scientifico	9.4488	2005-03-07	4				34.3284	22.4	5.97015	5.97015	53.7313	1	53.7313	0	0	0	53.7313		0	0	0	0	19.403	4.47761	0	0	4.47761	0	0	0	0	0	0	0	1.49254	0	1.49254	0	0	0	0	0	0	0	1.49254	0	0
61	2005	Karpata	8.8392	2005-03-09	0				46.6667	19.2	20.9524	6.66667	21.9048	1	21.9048	1.90476	10	19.0476	50.4762		0.952381	0.952381	10	9.52381	25.7143	2.85714	0	1.90476	1.90476	0	0	0	0	0	0	0	0	0	0.952381	0	0	0	12.381	0.952381	0	0	0	0	0
62	2005	Karpata	9.4488	2005-03-09	0				41.5094	6.4	12.2642	8.49057	32.0755	1	32.0755	5.66038	10	56.6038	88.6792		0	0	0	0	8.49057	3.77358	0	6.60377	9.43396	0	0	0	0	0.943396	0.943396	0	4.71698	3.77358	0.943396	0	0	0	1.88679	0	0	0	0	0	0
63	2005	Karpata	9.4488	2005-03-09	0				49.0385	22.4	2.88462	19.2308	23.0769	1	23.0769	5.76923	10	57.6923	80.7692		0	0	0	0	26.9231	6.73077	0	0	1.92308	0	0	0	0	0	0	0	6.73077	0	0	0.961538	0	0	4.80769	0	0	0	0.961538	0	0
64	2005	Karpata	9.7536	2005-03-09	0				50.8929	19.2	11.6071	10.7143	18.75	1	18.75	8.03571	10	80.3571	99.1071		0	0	0	0	34.8214	0	0	0	1.78571	0	0	0	0	0	1.78571	0	0	0	1.78571	0	2.67857	0	6.25	0.892857	0	0	0.892857	0	0
65	2005	Forest	9.7536	2005-03-10	0				69.378	12.8	5.74163	6.69856	16.2679	0.5	8.13397	1.91388	5	9.56938	17.7033		0	0	0	0	7.6555	19.1388	0	2.87081	8.61244	0	0	0	0	0	0	0	0	0	0	5.74163	0	0	5.74163	1.91388	0	0	17.2249	0	0
66	2005	Forest	9.4488	2005-03-10	0				46.8085	32	24.4681	1.06383	27.6596	1	27.6596	0	0	0	27.6596		0	0	0	0	2.12766	2.12766	0	0	22.3404	0	0	0	0	0	0	0	2.12766	0	6.38298	0	0	0	2.12766	4.25532	0	0	5.31915	0	0
67	2005	Forest	8.8392	2005-03-10	0				62.9442	6.4	7.1066	5.07614	24.3655	2	48.731	0.507614	5	2.53807	51.269		0	0	0	0	8.12183	18.2741	0	0	3.04569	0	0	0	0	1.01523	3.04569	0	1.01523	0	5.07614	0	0	0	4.06091	0	0	0	19.2893	0	0
68	2005	Forest	9.144	2005-03-10	0				46.7593	12.8	9.25926	6.48148	36.1111	2	72.2222	0.462963	5	2.31481	79.1667		0	0.925926	5	4.62963	18.5185	4.62963	0	0	0	0	0	0	0	0	1.85185	0	0	0	3.7037	0	1.38889	0	8.33333	0.925926	0	0	7.40741	0	0
69	2005	Barcadera	9.7536	2005-03-12	0				50	22.4	7.31707	7.31707	30.4878	1	30.4878	2.43902	5	12.1951	42.6829		2.43902	0	0	0	9.7561	29.2683	0	0	0	0	1.21951	0	0	0	0	0	1.82927	0	0	0	0	0	7.31707	0	0	0	0.609756	0	0
70	2005	Barcadera	9.4488	2005-03-12	0				33.7662	28.8	2.5974	2.5974	53.2468	1	53.2468	6.49351	5	32.4675	85.7143		1.2987	0	0	0	10.3896	12.987	0	0	2.5974	0	0	0	0	1.2987	0	2.5974	0	0	0	3.8961	0	0	0	0	0	0	0	0	0
71	2005	Barcadera	9.4488	2005-03-12	0				34.4262	25.6	9.83607	3.27869	45.9016	2	91.8033	4.91803	5	24.5902	116.393		1.63934	0	0	0	9.01639	9.83607	0	0	0	0	0	0	0	3.27869	0	0.819672	6.55738	0	0	0	0	0	4.91803	0	0	0	0	0	0
72	2005	Barcadera	8.8392	2005-03-12	0				40.8602	28.8	7.52688	8.60215	38.7097	2	77.4194	0	0	0	77.4194		4.30108	0	0	0	30.1075	0	0	0	0	0	1.07527	0	0	0	0	0	0	0	0	0	0	0	8.60215	0	0	0	0.537634	0	0
73	2007	Windsock		2007-03-13	0	0	0	0	44.1558	51.2	0	1.2987	54.5455	0.779221	42.503	0	0	0	42.503		0	0	0	0	22.0779	0	0	5.19481	3.8961	0	0	0	0	3.8961	0	0	0	0	0	0	5.19481	0	3.8961	0	0	0	0	0	0
74	2007	Windsock		2007-03-13	0	0	0	0	46.6019	35.2	4.85437	0.970874	47.5728	0.582524	27.7123	0	0	0	27.7123		0	0	0	0	24.2718	5.82524	0	1.94175	1.94175	0	0	0	0	0.970874	0	0	0	0	0	3.8835	0.970874	0	3.8835	0	0	0	0	0	0
75	2007	Windsock		2007-03-13	0	0	0	0	26.1364	32	5.68182	2.27273	62.5	0.909091	56.8182	3.40909	0	0	56.8182		0	0	0	0	10.2273	3.40909	0	5.68182	1.13636	0	0	0	0	2.27273	0	0	0	0	0	0	0	0	0	0	0	0	0	0	0
76	2007	Windsock		2007-03-13	1	0	0	0	50	38.4	4.05405	1.35135	40.5405	1.08108	43.8276	4.05405	0	0	43.8276		0	0	0	0	6.75676	16.2162	0	0	4.05405	0	0	0	0	0	0	0	0	0	0	5.40541	0	0	17.5676	0	0	0	0	0	0
77	2007	18th Palm		2007-03-13	0	0	0	0	42.8571	28.8	9.52381	1.90476	38.0952	0.761905	29.0249	7.61905	5	38.0952	67.1202		0	0	0	0	5.71429	2.85714	0	5.71429	10.4762	0	0	0	0	0	0	0	2.85714	0	1.90476	3.80952	0	0	3.80952	2.85714	0	0	0.952381	0	0
78	2007	18th Palm		2007-03-13	0	0	0	0	43.2836	38.4	2.98507	2.98507	38.806	0.895522	34.7516	11.9403	5	59.7015	94.4531		0	0	0	0	8.95522	26.8657	0	0	2.98507	0	2.98507	0	0	0	0	0	0	0	0	0	0	0	0	0	0	0	1.49254	0	0
79	2007	18th Palm		2007-03-13	0	0	0	0	49.5575	41.6	3.53982	1.76991	29.2035	0.353982	10.3375	15.9292	10	159.292	169.63		0	0	0	0	1.76991	37.1681	0	0	0	0	0	0	0	1.76991	0	2.65487	0	0	0	3.53982	0	0	0	0	0	0	0	0	0
80	2007	18th Palm		2007-03-13	0	0	0	0	32.6923	44.8	3.84615	3.84615	42.3077	1.15385	48.8166	17.3077	5	86.5385	135.355		0	0	0	0	9.61538	11.5385	0	0	11.5385	0	0	0	0	0	0	0	0	0	0	0	0	0	0	0	0	0	0	0	0
81	2007	Forest		2007-03-14	1	0	0	0	71.1765	32	4.11765	7.05882	17.6471	0.235294	4.15225	0	0	0	4.15225		0	0	0	0	34.1176	8.82353	0	2.35294	1.17647	0	0	0	0	0	0	0	0	0	0	2.35294	0	0	9.41176	0	0	0	12.9412	0	0
82	2007	Forest		2007-03-14	0	0	0	0	74.3056	28.8	0	2.08333	16.6667	0.694444	11.5741	6.94444	10	69.4444	81.0185		0	0	0	0	20.8333	6.94444	0	6.94444	2.77778	0	0	0	0	2.77778	1.38889	0	0	0	0	1.38889	0	0	13.1944	0	0	0	18.0556	0	0
83	2007	Forest		2007-03-14	0	10	0	0	69.4915	21.3333	8.47458	3.38983	18.6441	0.169492	3.16001	0	0	0	3.16001		0	0	0	0	11.0169	0	0	5.08475	0	0	0	0	0	0	6.77966	0	7.62712	0	3.38983	0.847458	0	0	23.7288	0	0	0	11.0169	0	0
84	2007	Forest		2007-03-14	0	0	0	0	55.9701	28.8	10.4478	1.49254	29.8507	0.149254	4.45534	0.746269	10	7.46269	26.8434		0	1.49254	10	14.9254	11.9403	0	2.98507	5.97015	2.23881	0	0	0	0	0	0	0	0	0	0	2.98507	0	0	0	0	0	0	29.8507	0	0
85	2007	Barcadera		2007-03-14	1	0	0	0	51.3761	54.4	1.83486	3.66972	34.8624	0.366972	12.7935	4.58716	10	45.8716	58.6651		3.66972	0	0	0	27.5229	0	0	0	2.75229	0	0	0	0	5.50459	0	0	3.66972	0	0	0	0	0	6.42202	0	0	0	5.50459	0	0
86	2007	Barcadera		2007-03-14	1	0	0	0	31.3869	41.6	5.10949	5.10949	46.7153	0.291971	13.6395	11.6788	5	58.3942	72.0337		0	0	0	0	5.83942	17.5182	0	0	0.729927	0	1.45985	0	0	1.45985	0	0	0	0	0.729927	0	0	0	0	1.45985	0	0	2.18978	0	0
87	2007	Barcadera		2007-03-14	0	0	0	0	43.9394	32	0	10.6061	36.3636	0.151515	5.50964	9.09091	10	90.9091	96.4187		0	0	0	0	31.8182	0	0	0	0	1.51515	0	0	0	2.27273	3.0303	0	0	0	2.27273	0	0	0	0	3.0303	0	0	0	0	0
88	2007	Barcadera		2007-03-14	0	0	0	0	51.3158	28.8	2.63158	3.94737	39.4737	0.263158	10.3878	2.63158	10	26.3158	36.7036		0	0	0	0	28.9474	5.26316	0	0	1.97368	0	0	0	0	3.28947	0	0	0	0	7.89474	0	0	0	0	2.63158	0	0	1.31579	0	0
89	2007	Karpata		2007-03-25	0	0	0	0	50	48	13.6364	4.54545	17.0455	0.340909	5.81095	13.6364	3	40.9091	46.72		1.13636	0	0	0	18.1818	6.81818	0	0	10.2273	0	0	0	0	0	0	0	0	0	2.27273	0	0	0	5.68182	2.27273	0	0	4.54545	0	0
90	2007	Karpata		2007-03-25	1	0	0	0	44.7059	35.2	0	4.70588	34.1176	0.235294	8.02768	16.4706	2	32.9412	40.9689		0	0	0	0	15.2941	12.9412	0	7.05882	0	0	0	0	0	0	0	0	0	0	0	0	3.52941	0	1.17647	0	0	0	4.70588	0	0
91	2007	Karpata		2007-03-25	0	0	0	0	53.4247	38.4	8.21918	6.84932	9.58904	0.273973	2.62713	10.9589	2	21.9178	93.0381		4.10959	6.84932	10	68.4932	2.05479	15.0685	0	0	6.84932	0	0	0	0	0	2.73973	0	2.73973	0	0	4.10959	6.84932	0	9.58904	0	0	0	3.42466	0	0
92	2007	Karpata		2007-03-25	0	0	0	0	29.6089	44.8	4.46927	5.58659	35.7542	0.335196	11.9846	18.9944	3	56.9832	68.9679		5.58659	0	0	0	14.5251	0	0	0	9.49721	0	0	0	0	2.23464	0	0	0	0	0	1.11732	0	0	0	0	0	0	2.23464	0	0
93	2007	Reef Scientifico		2007-03-15	0	0	0	0	35.1562	64	3.125	1.5625	53.125	0.15625	8.30078	7.03125	5	35.1562	43.457		0	0	0	0	0	19.5312	0	0	0	0	0.78125	0	0	1.5625	0	0	0	0	0	0	0	0	10.9375	0	0	0	0	0	0
94	2007	Reef Scientifico		2007-03-15	0	0	0	0	53.1646	60.8	6.32911	1.26582	31.6456	0.253165	8.01154	7.59494	5	37.9747	45.9862		0	0	0	0	0.632911	21.519	0	2.53165	5.06329	0	3.79747	0	0	0	0	0.632911	2.53165	0	2.53165	0	0	0	6.32911	2.53165	0	0	2.53165	0	0
95	2007	Reef Scientifico		2007-03-15	0	0	0	0	42.5926	28.8	12.963	3.7037	27.7778	0.185185	5.14403	12.963	5	64.8148	69.9588		0	0	0	0	0	7.40741	0	7.40741	6.48148	0	0.925926	0	0	0.925926	0	1.85185	0	0	0	0.925926	5.55556	0	9.25926	0	0	0	1.85185	0	0
96	2007	Reef Scientifico		2007-03-15	1	0	0	0	41.2844	41.6	9.17431	1.83486	40.367	0.183486	7.40678	7.33945	5	36.6972	44.104		0	0	0	0	5.50459	22.0183	0	0.917431	11.0092	0	0	0	0	0	0	0	0	0	0	1.83486	0	0	0	0	0	0	0	0	0
97	2009	Bachelor's Beach	9.144	2009-03-02	0	0	0	0	25.1534	35.2	4.90798	7.36196	55.2147	0.368098	20.3244	7.36196	5	36.8098	57.1343		0	0	0	0	11.6564	0	0	0	1.84049	0	0	0	0	0	0	4.29448	0	0	0	6.13497	0	0	0	0	0	1.22699	0	0	0
98	2009	Bachelor's Beach	9.7536	2009-03-02	0	0	0	0	30.8824	9.6	10.2941	5.88235	33.8235	0.588235	19.8962	19.1176	5	95.5882	115.484		0	0	0	0	7.35294	10.2941	0	0	3.67647	0	0	0	0	0	0	0	0	0	0	0	1.47059	0	5.88235	0	0	2.20588	0	0	0
99	2009	Bachelor's Beach	10.0584	2009-03-02	0	0	0	0	39.6552	12.8	8.62069	1.72414	31.0345	0.517241	16.0523	15.5172	5	77.5862	93.6385		3.44828	0	0	0	1.72414	10.3448	0	0	1.72414	0	0	0	0	0	10.3448	0	0	0	0	5.17241	6.89655	0	0	0	0	1.72414	0	0	0
100	2009	Bachelor's Beach	10.0584	2009-03-02	0	0	0	0	33.913	28.8	13.913	3.47826	34.7826	0.521739	18.1474	12.1739	5	60.8696	79.017		1.73913	0	0	0	17.3913	0	0	8.69565	3.47826	0	0	0	0	0	0	0	0	0	2.6087	0	0	0	0	0	0	0	0	0	0
101	2009	Windsock	9.4488	2009-03-02	0	0	0	1	49.3827	0	0	0	50.6173	0.246914	12.4981	0	0	0	12.4981		0	0	0	0	27.1605	14.8148	0	0	2.46914	0	0	0	0	0	0	0	0	0	0	0	3.7037	0	0	1.23457	0	0	0	0	0
102	2009	Windsock	9.144	2009-03-02	0	0	0	0	37.4046	0.6	0	0	61.0687	0.152672	9.32347	1.52672	5	7.63359	16.9571		0	0	0	0	18.3206	10.687	0	0	3.81679	0	0	0	0	0	0	0	0	0	1.52672	0	0	0	0	0	0	0	0	0	0
103	2009	Windsock	8.8392	2009-03-02	0	0	0	0	54.4444	0.6	4.44444	3.33333	35.5556	0.222222	7.90123	0	0	0	19.0123		1.11111	1.11111	10	11.1111	21.1111	26.6667	0	0	0	0	0	0	0	3.33333	0	0	2.22222	0	0	0	0	0	0	0	0	1.11111	0	0	0
104	2009	Windsock	9.7536	2009-03-02	0	0	0	0	29.8861	0.4	14.0228	5.25855	47.3269	0.35057	16.5914	0	0	0	156.819		0	3.5057	40	140.228	12.2699	7.01139	0	0	6.13497	0	0	0	0	3.5057	0	0	0	0	0.964067	0	0	0	0	0	0	0	0	0	0
	2009	Windsock								0.8
105	2009	Calabas	10.9728	2009-03-03	0	0	0	0	31.2	6.4	4	0.8	46.4	0.48	22.272	16	10	160	182.272		1.6	0	0	0	0	25.6	0	0	0	0	0	0	0	4.8	0	0	0	0	0	0	0	0	0	0	0	0.8	0	0	0
106	2009	Calabas	0.9144	2009-03-03	0	0	0	0	34.8259	3.2	1.49254	0.995025	43.7811	0.199005	8.71266	17.9104	10	179.104	187.817		0.995025	0	0	0	14.4279	14.9254	0	4.97512	0.497512	0	0	0	0	0	0	0	0	0	0	0	0	0	0	0	0	0	0	0	0
107	2009	Calabas	10.3632	2009-03-03	0	1	0	0	44.3114	12	1.79641	2.39521	39.521	0.239521	9.4661	11.976	5	59.8802	69.3463		0	0	0	0	19.7605	11.976	0	9.58084	0	0	0	0	0	1.1976	0	0	0	0	1.1976	0	0	0	0	0	0	0	0	0	0
108	2009	Calabas	10.0584	2009-03-03	2	1	0	0	31.746	6.4	0.721501	1.443	47.619	0.2886	13.7429	18.4704	10	184.704	198.447		0	0	0	0	12.987	0.721501	0	0.721501	1.443	0	0	0	0	1.443	0	0	0	0	0	0	11.544	0	0	0	0	0	0	0	0
	2009	Calabas								9.6
109	2009	18th Palm	9.144	2009-03-03	0	0	0	0	38.8128	3.2	2.73973	0.913242	33.79	0.182648	6.17168	21.9178	10	219.178	225.35		1.82648	0	0	0	1.82648	18.7215	0	7.30594	0	0	0.913242	0	0	2.73973	0	0	2.73973	0	0	0	0	0	0	0	0	0	0	0	0
110	2009	18th Palm	10.0584	2009-03-03	0	1	0	0	43.3333	9.6	5.83333	2.08333	37.5	0.166667	6.25	11.25	5	56.25	62.5		0	0	0	0	10	10	0	4.16667	2.5	0	11.6667	0	0	0.833333	0	0	0	0	0	0	2.5	0	0	0	0	0	0	0	0
111	2009	18th Palm	9.7536	2009-03-03	0	0	0	0	36.6412	12.8	0	0.763359	42.7481	0.305344	13.0529	18.3206	10	183.206	196.259		1.52672	0	0	0	10.687	12.2137	0	6.10687	0	0	0	0	0	7.63359	0	0	0	0	0	0	0	0	0	0	0	0	0	0	0
112	2009	18th Palm	9.7536	2009-03-03	0	0	0	0	41.2903	9.6	14.1935	0.645161	32.2581	0.258065	8.32466	11.6129	10	116.129	124.454		0	0	0	0	12.9032	0	0	9.03226	7.74194	0	0	0	0	5.16129	0	0	0	0	0	0	0	0	2.58065	0	0	0	0	0	0
113	2009	Front Porch	9.7536	2009-03-04	1	0	0	0	27.5449	9.6	8.38323	2.99401	41.9162	0.239521	10.0398	17.9641	5	89.8204	99.8602		1.1976	0	0	0	0	4.79042	0	13.1737	1.1976	0	2.39521	0	0	1.1976	0	0	0	0	1.1976	0	3.59281	0	0	0	0	0	0	0	0
114	2009	Front Porch	9.7536	2009-03-04	1	0	0	0	35.4331	16	9.44882	4.72441	44.0945	0.314961	13.888	6.29921	5	31.4961	45.3841		0	0	0	0	18.8976	0	0	0	1.5748	0	1.5748	0	0	8.66142	0	0	1.5748	0	1.5748	0	0	0	0	0	0	1.5748	0	0	0
115	2009	Front Porch	10.0584	2009-03-04	0	0	0	0	26.8041	12.8	10.3093	3.09278	37.1134	0.206186	7.65225	22.6804	10	226.804	234.456		0	0	0	0	4.12371	3.09278	0	5.15464	0	0	4.12371	0	0	3.09278	0	0	2.06186	0	2.06186	0	0	0	0	0	0	3.09278	0	0	0
116	2009	Front Porch	10.668	2009-03-04	0	0	0	0	37.1681	9.6	12.3894	0.884956	24.7788	0.176991	4.38562	23.8938	10	238.938	243.324		0.884956	0	0	0	7.07965	7.9646	0	7.07965	1.76991	0	2.65487	0	0	1.76991	0	0	1.76991	0	1.76991	0	5.30973	0	0	0	0	0	0	0	0
	2009	Front Porch								16
117	2009	Reef Scientifico	9.7536	2009-03-04	0	0	0	0	44.3709	3.2	3.97351	3.97351	39.7351	0.264901	10.5259	7.94702	5	39.7351	50.261		0	0	0	0	9.27152	9.27152	0	14.5695	1.3245	0	0	0	0	1.98675	0	0	2.64901	0	0	0	3.97351	0	0	0	0	0	0	0	0
118	2009	Reef Scientifico	9.7536	2009-03-04	0	0	0	0	54.386	9.6	3.50877	1.75439	33.3333	0.350877	11.6959	7.01754	5	35.0877	46.7836		0	0	0	0	19.2982	0	0	8.77193	7.89474	0	0	0	0	3.50877	0	1.75439	0	0	0	0	7.01754	0	0	0	0	0.877193	0	0	0
119	2009	Reef Scientifico	8.5344	2009-03-04	0	0	0	0	38.7097	32	1.6129	0	40.3226	0.322581	13.0073	19.3548	10	193.548	206.556		0	0	0	0	17.7419	6.45161	0	0	6.45161	0	0	0	0	1.6129	0	0	0	0	1.6129	0	0	0	0	1.6129	0	3.22581	0	0	0
120	2009	Reef Scientifico	8.2296	2009-03-04	0	0	0	0	42	3.2	0	0	52	0.2	10.4	6	5	30	40.4		0	0	0	0	0	32	0	0	0	0	0	0	0	4	0	0	6	0	0	0	0	0	0	0	0	0	0	0	0
121	2009	Oil Slick	10.0584	2009-03-05	0	0	0	0	56.8182	3.2	10.2273	5.68182	21.5909	0.227273	4.90702	4.54545	10	45.4545	50.3616		1.13636	0	0	0	26.1364	6.81818	0	0	6.81818	0	0	0	0	0	0	0	0	0	0	0	0	0	0	0	0	0	0	0	17.0455
122	2009	Oil Slick	10.0584	2009-03-05	0	0	0	0	40.4255	9.6	1.06383	7.44681	43.617	0.212766	9.28022	7.44681	10	74.4681	83.7483		0	0	0	0	14.8936	10.6383	0	5.31915	5.31915	0	0	0	0	0	0	0	0	0	0	0	0	0	4.25532	0	0	0	0	0	0
123	2009	Oil Slick	9.7536	2009-03-05	0	0	0	0	38.7755	6.4	7.9858	3.54925	31.9432	0.177462	5.66872	16.8589	5	84.2946	89.9633		0.887311	0	0	0	16.8589	4.43656	0	0	0.887311	0	0	0	0	0	0	0	2.66193	0	1.77462	0	0	0	1.77462	0	0	0	0	0	0
124	2009	Oil Slick	9.7536	2009-03-05	0	0	0	0	50	19.2	3.7037	3.7037	32.4074	0.185185	6.00137	10.1852	5	50.9259	56.9273		0	0	0	0	14.8148	11.1111	0	4.62963	4.62963	0	0	0	0	0	0	0	0	0	0	0	0	0	6.48148	0	0	0	0	0	0
	2009	Oil Slick								6.4
	2009	Karpata								6.4
	2009	Karpata								9.6
	2009	Karpata								0
125	2009	Barcadera	10.0584	2009-03-05	0	0	0	0	41.6667	10	0	1.04167	53.125	0.208333	11.0677	4.16667	5	20.8333	31.901		0	0	0	0	14.5833	23.9583	0	0	1.04167	0	0	0	0	0	0	0	0	0	0	0	0	0	0	2.08333	0	0	0	0	0
126	2009	Barcadera	9.4488	2009-03-05	0	1	0	0	54.5455	3.2	2.42424	6.66667	29.0909	0.242424	7.05234	6.06061	5	30.303	37.3554		1.21212	0	0	0	25.4545	14.5455	0	0	0	0	0	0	0	4.84848	0	0	0	0	2.42424	1.21212	0	0	6.06061	0	0	0	0	0	0
127	2009	Barcadera	9.4488	2009-03-05	0	0	0	0	53.7634	6.4	4.30108	3.22581	27.957	0.215054	6.01226	10.7527	5	53.7634	59.7757		0	0	0	0	5.37634	23.6559	0	0	2.15054	0	0	0	0	0	0	0	1.07527	0	2.15054	0	4.30108	0	10.7527	2.15054	0	0	2.15054	0	0
128	2009	Barcadera	8.5344	2009-03-05	0	2	0	0	47.2527	19.2	5.49451	5.49451	36.2637	0.21978	7.97005	4.3956	2	8.79121	16.7613		1.0989	0	0	0	8.79121	15.3846	0	0	0	2.1978	2.1978	0	0	0	3.2967	0	1.0989	0	2.1978	0	0	0	9.89011	0	0	2.1978	0	0	0
129	2009	Forest	10.668	2009-03-06	0	1	0	0	56.1086	6.4	3.61991	6.33484	28.9593	0.0904977	2.62075	4.52489	5	22.6244	25.2452		0.452489	0	0	0	7.23982	1.80995	2.71493	5.42986	4.52489	0	0	0	0	1.80995	0	0	0	0	4.52489	1.80995	2.71493	0	1.80995	0	0	0	21.7195	0	0
130	2009	Forest	10.0584	2009-03-06	0	1	0	0	61.4973	12.8	11.7647	3.20856	22.4599	0.106952	2.40213	0	0	0	45.1829		0	1.06952	40	42.7807	9.09091	0	0	0	8.55615	0	0	0	0	0	4.27807	0	0	0	4.27807	0	0	0	8.55615	0	0	0	19.2513	0	0
131	2009	Forest	9.7536	2009-03-06	0	0	0	0	55.794	6.4	15.4506	3.00429	13.7339	0.0858369	1.17888	12.0172	5	60.0858	61.2647		0	0	0	0	20.6009	0	0	9.44206	0	0	0	0	0	0	0.858369	0	0	0	0	0.858369	0	0	11.1588	4.29185	0	7.5	8.58369	0	0
132	2009	Forest	9.144	2009-03-06	0	0	0	0	42.204	12.8	13.2474	7.034	29.3083	0.117233	3.43591	8.20633	5	41.0317	44.4676		0	0	0	0	10.551	11.7233	0	4.68933	1.17233	0	0	0	0	0	2.34467	1.17233	0	0	4.68933	1.17233	0	0	0	0	0	0	4.68933	0	0
	2009	Forest								0
133	2011	Calabas	10.3632	2011-02-26	0	1	0		15.8192	5	5.64972	1.69492	50.8475	4	203.39	25.9887	10	259.887	463.277	0	0	0	0	0	7.9096	0	0	0	0.564972	0	0	0	0	0.564972	0	0	1.12994	0	1.12994	0	4.51977	0	0	0	0	0	0	0	0
134	2011	Calabas	10.0584	2011-02-26	0	0	0		29.8013		0.662252	1.98675	42.3841	3	127.152	25.1656	10	251.656	378.808	0	0	0	0	0	4.63576	11.9205	0	0	4.63576	0	2.64901	0	0	1.3245	0	0	1.98675	0	1.3245	0	0	0	0	0	0	0	0	0	0
135	2011	Calabas	10.668	2011-03-02	0	0	0		25		4.41176	1.47059	35.2941	2	70.5882	33.8235	15	507.353	577.941	0	0	0	0	0	7.35294	10.2941	0	0	2.94118	0	0	0	0	0	0	0	0	0	0	0	0	0	0	0	0	0	0	0	0
136	2011	Calabas	9.4488	2011-03-02	7	1	0		24.4186		2.32558	2.32558	53.4884	2	106.977	17.4419	10	174.419	281.395	0	0	0	0	0	3.48837	8.13953	0	9.30233	1.16279	0	0	0	0	2.32558	0	0	0	0	0	0	0	0	0	0	0	0	0	0	0
137	2011	Oil Slick	10.3632	2011-02-27	0	0	0		32	40	6.66667	6.66667	41.3333	4	165.333	13.3333	20	266.667	432	0	0	0	0	0	16	9.33333	0	2.66667	1.33333	0	0	0	0	0	0	0	0	0	1.33333	0	0	0	0	0	0	1.33333	0	0	0
138	2011	Oil Slick	10.668	2011-02-27	0	0	0		36.7965		10.3896	8.65801	25.974	4	103.896	18.1818	40	727.273	831.169	0	0	0	0	0	8.65801	6.06061	0	0	3.0303	0	0	1.7316	0	0.865801	0	0	0	0	2.5974	0	1.7316	0	3.4632	0.865801	0	2.5974	2.5974	0	0
139	2011	Oil Slick	11.2776	2011-02-27	0	0	0		41.5385		0	6.15385	33.8462	2	67.6923	18.4615	50	923.077	990.769	0	0	0	0	0	0	6.15385	0	4.61538	4.61538	0	0	0	0	1.53846	0	0	0	0	1.53846	0	0	0	0	2.30769	0	0	18.4615	0	0
140	2011	Oil Slick	10.3632	2011-02-27	0	0	0		42.6966		0	23.5955	20.2247	2	40.4494	13.4831	20	269.663	310.112	0	0	0	0	0	7.86517	7.86517	0	0	2.24719	0	0	2.24719	0	2.24719	0	0	0	0	0	3.37079	0	0	3.37079	3.37079	0	0	8.98876	0	0
141	2011	Front Porch	10.668	2011-02-27	0	0	0		37.8641	128	29.1262	9.70874	19.4175	2	38.835	3.8835	5	19.4175	58.2524	0	0	0	0	0	0	3.8835	0	8.73786	5.82524	0	0	0	0	0	0	0	0	0	0	0	9.70874	0	0	0	0	3.8835	0	0	0
142	2011	Front Porch	10.9728	2011-02-27	1	0	0		54.8387	47.0588	9.67742	4.83871	24.1935	2	48.3871	6.45161	5	32.2581	80.6452	0	0	0	0	0	27.4194	4.83871	0	3.22581	11.2903	0	0	0	0	3.22581	0	0	0	0	0	0	0	0	4.83871	0	0	0	0	0	0
143	2011	Front Porch	10.3632	2011-02-27	0	0	0		33.3333	10	14.1844	8.51064	42.5532	2	85.1064	1.41844	5	7.0922	92.1986	0	0	0	0	0	5.67376	0	0	7.0922	0	0	0	2.83688	0	0	0	0	0	0	4.96454	0	0	0	11.3475	1.41844	0	0	0	0	0
	2011	Front Porch								9.41176
	2011	Front Porch								8.42105
	2011	Front Porch								0
	2011	Front Porch								0
144	2011	Bachelor's Beach	10.0584	2011-02-28	1	0	0		30.9859	0	15.493	7.04225	26.7606	3	80.2817	19.7183	20	394.366	474.648	0	0	0	0	0	0	30.9859	0	0	0	0	0	0	0	0	0	0	0	0	0	0	0	0	0	0	0	0	0	0	0
145	2011	Bachelor's Beach	10.0584	2011-02-28	0	0	2		36.7232	32	16.9492	3.38983	21.4689	2	42.9379	19.209	20	384.181	427.119	0	2.25989	0	0	0	16.9492	3.38983	0	1.12994	3.9548	0	0	0	0	0	0	0	3.38983	0	0	0	2.25989	0	0	0	0	0	0	0	0
146	2011	Bachelor's Beach	11.8872	2011-02-28	0	0	0		38.6282	30	6.01685	7.22022	42.1179	2	84.2359	6.01685	10	60.1685	144.404	0	0	0	0	0	6.01685	10.8303	0	3.61011	1.20337	0	0	0	0	0	0	7.94224	0	0	0	1.20337	2.40674	0	3.61011	0	0	1.20337	0	0	0
147	2011	Bachelor's Beach	10.3632	2011-02-28	0	0	0		24.5283	0	11.3208	5.66038	37.7358	2	75.4717	20.7547	10	207.547	283.019	0	0	0	0	0	11.3208	0	0	13.2075	0	0	0	0	0	0	0	0	0	0	0	0	0	0	0	0	0	0	0	0	0
	2011	Bachelor's Beach								0
	2011	Bachelor's Beach								0
148	2011	Windsock	9.144	2011-02-28	0	0	1		36.5385	16.8421	0	6.41026	39.7436	2	79.4872	16.6667	5	83.3333	166.026	0	0	0.641026	5	3.20513	21.7949	7.05128	0	0	2.5641	0	0	0	0	0.641026	0	0	2.5641	0	0.641026	1.28205	0	0	0	0	0	0	0	0	0
149	2011	Windsock	9.4488	2011-02-28	0	0	0		34.375	16.8421	0	4.6875	45.3125	1	45.3125	15.625	5	78.125	123.438	0	0	0	0	0	18.75	0	0	10.9375	1.5625	0	0	0	0	1.5625	0	0	0	0	1.5625	0	0	0	0	0	0	0	0	0	0
150	2011	Windsock	10.668	2011-02-28	0	1	0		34.9112	10.6667	3.5503	5.91716	33.1361	1.5	49.7041	22.4852	5	112.426	162.13	0	0	0	0	0	9.46746	1.18343	0	0	9.46746	0	0	0	0	4.14201	0	0	4.73373	0	1.18343	0	0	0	0	0	0	0	0	0	0
151	2011	Windsock	9.4488	2011-02-28	0	1	0		49.4624	8.88889	0	4.30108	32.2581	2	64.5161	12.9032	5	64.5161	134.409	0	0	1.07527	5	5.37634	25.8065	8.60215	0	0	0	0	0	1.07527	0	6.45161	0	0	0	0	1.07527	0	3.22581	0	0	0	0	0	3.22581	0	0
152	2011	18th Palm	10.3632	2011-02-28	0	0	0		27.9621	10.6667	0	7.58294	33.1754	3	99.5261	31.2796	20	625.592	725.118	0	0	0	0	0	9.47867	3.79147	0	0	6.63507	0	0	0	0	2.36967	0	0	1.89573	0	3.79147	0	0	0	0	0	0	0	0	0	0
153	2011	18th Palm	10.3632	2011-02-28	0	1	2		29.0698	0	1.16279	1.16279	25.5814	4	102.326	43.0233	40	1720.93	1823.26	0	0	0	0	0	0	13.9535	0	2.32558	0	0	0	4.65116	0	0	0	0	0	0	3.48837	0	0	0	0	0	0	1.16279	0	0	0
154	2011	18th Palm	9.7536	2011-02-28	0	2	0		32.3529	0	0.980392	6.86275	29.4118	3	88.2353	30.3922	20	607.843	696.078	0	0	0	0	0	3.92157	9.80392	0	2.94118	2.94118	0	0	0	0	3.92157	0	0	0	0	0.980392	0	0	0	3.92157	0	0	0.980392	0	0	0
155	2011	18th Palm	10.668	2011-02-28	0	6	0		42.7083	0	3.125	5.20833	18.75	3	56.25	30.2083	20	604.167	660.417	0	0	0	0	0	4.16667	11.4583	0	20.8333	0	0	0	0	0	0	0	0	0	0	0	0	1.04167	0	0	1.04167	0	4.16667	0	0	0
	2011	Reef Scientifico	10.3632	2011-03-01	0	0	0		31.5789	0	11.8421	2.63158	43.4211	3	130.263	10.5263	5	52.6316	182.895	0	0	0	0	0	9.21053	0	0	3.94737	0	0	0	3.94737	0	0	0	3.94737	0	0	0	5.26316	3.94737	0	0	0	0	0	0	0	0
157	2011	Reef Scientifico	9.4488	2011-03-01	0	0	0		26.9231	8	5.76923	3.84615	32.6923	3	98.0769	30.7692	4	123.077	221.154	0	0	0	0	0	0	17.3077	0	0	0	0	0	0	0	3.84615	0	0	3.84615	0	0	0	0	0	0	0	0	1.92308	0	0	0
158	2011	Reef Scientifico	9.4488	2011-03-01	0	0	0		43.1579	0	8.42105	8.42105	28.4211	3	85.2632	11.5789	10	115.789	201.053	0	0	0	0	0	10.5263	13.6842	0	0	3.15789	0	0	1.05263	0	0	0	2.10526	0	0	0	0	0	0	5.26316	1.05263	0	0	0	0	0
159	2011	Reef Scientifico	9.4488	2011-03-01	0	0	0		39.3258	0	7.86517	5.61798	42.6966	2	85.3933	4.49438	5	22.4719	107.865	0	0	0	0	0	4.49438	23.5955	0	0	2.24719	0	0	0	0	0	0	7.86517	0	0	0	0	0	0	0	0	0	1.1236	0	0	0
160	2011	Barcadera	9.7536	2011-03-02	1	2	1		48.1481	22.8571	0	5.29101	27.5132	3	82.5397	19.0476	5	95.2381	177.778	0	0	0	0	0	16.4021	25.3968	0	0	0	0	0	0	0	0	3.1746	0	0	0	0	0	0	0	0	0	0	0	0	3.1746	0
161	2011	Barcadera	10.3632	2011-03-02	0	21	0		45.0549	18.8235	1.0989	3.2967	43.956	3	131.868	6.59341	10	65.9341	200	2.1978	0	0	0	0	0	27.4725	0	7.69231	0	0	0	0	0	0	0	0	0	0	0	0	0	0	7.69231	0	0	0	0	2.1978	0
162	2011	Barcadera	9.7536	2011-03-02	0	7	0		29.7872	8.42105	3.19149	4.25532	48.9362	3	146.809	13.8298	10	138.298	285.106	0	0	0	0	0	2.12766	15.9574	0	0	0	0	0	0	0	2.12766	0	0	0	0	0	0	0	0	7.44681	0	0	0	2.12766	0	0
163	2011	Barcadera	10.0584	2011-03-02	0	5	0		41.1765	0	4.52489	7.23982	28.9593	3	86.8778	18.0995	8	144.796	231.674	0	0	0	0	0	11.7647	23.5294	0	0	0.452489	0	0	0	0	3.61991	0	0	0	0	0	0	0	0	0	0	0	0	0	0	0
164	2011	Barcadera	10.668	2011-03-03	0	3	0		44.2623		1.63934	4.09836	36.8852	3	110.656	13.1148	5	65.5738	178.689	2.45902	0	0	0	0	29.5082	3.27869	0	0	1.63934	0	0	1.63934	0	0.819672	0	0	0	0	0.819672	0	0	0	0	3.27869	0	0	3.27869	0	0
165	2011	Barcadera	10.9728	2011-03-03	0	10	1		30.6533		1.00503	9.04523	42.2111	2	84.4221	17.0854	5	85.4271	175.879	6.03015	0	0	0	0	13.0653	9.04523	0	3.01508	0	0	0.502513	0	0	2.01005	1.00503	0	2.01005	0	0	0	0	0	0	0	0	0	0	0	0
166	2011	Barcadera	10.0584	2011-03-03	0	3	1		26.2712		0	7.62712	47.4576	2	94.9153	18.6441	5	93.2203	197.458	9.32203	0	0	0	0	11.0169	11.8644	0	0	1.69492	0	0	0	0	0	0	0	0	0	1.69492	0	0	0	0	0	0	0	0	0	0
167	2011	Barcadera	8.8392	2011-03-03	0	0	0		32.6531		3.06122	8.16327	36.7347	2	73.4694	19.3878	10	193.878	270.408	3.06122	0	0	0	0	19.3878	7.14286	0	0	1.02041	0	0	0	0	0	0	0	0	0	0	0	2.04082	0	0	0	0	3.06122	0	0	0
168	2011	Forest	9.7536	2011-03-02	0	0	1		44.7761	73.8462	5.22388	5.22388	23.1343	2	46.2687	16.4179	10	164.179	262.687	0	0	5.22388	10	52.2388	4.47761	5.97015	0	2.98507	0	0	0	4.47761	0	0	1.49254	0	0	0	2.23881	0	0	0	2.23881	0	0	0	20.8955	0	0
169	2011	Forest	10.0584	2011-03-02	0	3	0		47.6636	18.8235	10.2804	2.80374	26.1682	4	104.673	10.2804	5	51.4019	184.112	0	0	2.80374	10	28.0374	5.60748	0	0	3.73832	1.86916	0	0	0	0	0	5.60748	0	0	0	1.86916	0	0	0	14.0187	0	0	0	14.9533	0	0
170	2011	Forest	10.0584	2011-03-02	0	5	0		46.4646	0	9.09091	7.07071	24.2424	2	48.4848	7.07071	10	70.7071	179.798	0	0	6.06061	10	60.6061	16.1616	0	0	4.0404	0	0	0	0	0	0	0	0	0	0	0	2.0202	0	0	5.05051	0	0	4.0404	15.1515	0	0
171	2011	Forest	9.144	2011-03-02	0	1	0		42.5532		15.9574	6.38298	27.6596	2	55.3191	6.38298	10	63.8298	129.787	0	0	1.06383	10	10.6383	8.51064	4.25532	0	7.44681	7.44681	0	0	0	0	0	2.12766	0	0	0	4.25532	0	0	0	4.25532	0	0	0	4.25532	0	0
172	2011	Karpata	8.8392	2011-03-03	0	3	0		38.2239	0	4.6332	11.583	20.0772	1	20.0772	25.4826	25	637.066	659.459	2.3166	0	0	0	0	13.1274	0	0	1.5444	6.94981	0	0	1.5444	0	5.40541	0	0	0	0	3.0888	0	0	0	2.3166	0	0	0	1.1583	3.0888	0
173	2011	Karpata	8.5344	2011-03-03	1	1	1		30.4		6.4	9.6	27.2	3	81.6	26.4	10	264	345.6	0	0	0	0	0	8	0.8	0	2.4	2.4	0	0	0.8	0	4	0	0	0	0	0	0	3.2	0	8	0.8	0	0	0	0	0
174	2011	Karpata	8.5344	2011-03-03	0	4	1		46.3636		6.36364	6.36364	21.8182	3	65.4545	19.0909	10	190.909	260.909	4.54545	0	0	0	0	22.7273	18.1818	0	3.63636	0	0	0	0	0	0	0	0	0	0	0	0	0	0	0	0	0	0	1.81818	0	0
175	2011	Karpata	10.0584	2011-03-03	0	2	0		40		1	8	26	2	52	25	10	250	308	6	0	0	0	0	10	8	0	0	11	0	2	0	0	3	1	0	0	0	0	0	0	0	4	1	0	0	0	0	0
176	2013	Calabas	10.0584	2013-03-02	0	1	0	0	20.4082	6.4	6.80272	0.680272	55.7823	2	111.565	16.3265	5	81.6327	193.197	0	0	0	0	0	5.44218	5.44218	0	0	0	0	1.36054	0	0	0	0	0	0	0	0	1.36054	4.08163	2.72109	0	0	0	0	0	0	0
177	2013	Calabas	10.0584	2013-03-02	0	0	0	0	21.9858	16	5.67376	7.0922	46.8085	3	140.426	18.4397	30	553.191	693.617	0	0	0	0	0	8.51064	4.25532	0	0	2.83688	0	0	0	0	0.70922	0	0	0	0	2.83688	0	2.83688	0	0	0	0	0	0	0	0
178	2013	Calabas	10.0584	2013-03-02	0	0	0	0	17.7419	0	8.06452	3.22581	54.8387	2	109.677	16.129	30	483.871	593.548	0	0	0	0	0	4.83871	0	0	0	4.83871	0	0	0	0	3.22581	0	0	0	0	4.83871	0	0	0	0	0	0	0	0	0	0
179	2013	Calabas	10.9728	2013-03-02	0	0	0	0	45.3608	6.4	2.06186	1.03093	35.0515	2	70.1031	16.4948	30	494.845	564.948	0	0	0	0	0	12.3711	12.3711	0	10.3093	4.12371	0	0	0	0	0	0	0	6.18557	0	0	0	0	0	0	0	0	0	0	0	0
	2013	Calabas								3.2
180	2013	Front Porch	10.0584	2013-03-03	0	0	0	0	12.1951	9.6	18.2927	1.21951	36.5854	2	73.1707	30.4878	10	304.878	379.249	1.2	1.21951	0	0	0	3.65854	0	0	0	0	0	2.43902	0	0	0	0	0	6.09756	0	0	0	0	0	0	0	0	0	0	0	0
181	2013	Front Porch	10.0584	2013-03-03	0	0	0	0	6.74157	25.6	14.6067	6.74157	46.0674	2	92.1348	25.8427	4	103.371	195.506	0	0	0	0	0	1.1236	0	0	3.37079	0	0	0	0	0	0	0	0	0	0	0	0	1.1236	0	0	0.561798	0	0.561798	0	0	0
182	2013	Front Porch	9.4488	2013-03-03	0	1	0	0	25.3165	6.4	18.9873	3.79747	26.5823	2	53.1646	25.3165	20	506.329	559.494	0	0	0	0	0	0	0	0	12.6582	0	0	0	3.79747	0	0	0	0	0	0	5.06329	0	0	0	0	0	0	0	0	0	0
183	2013	Front Porch	10.3632	2013-03-03	0	0	0	0	25.2174	0	17.3913	5.21739	48.6957	2	97.3913	3.47826	5	17.3913	114.783	0	0	0	0	0	1.73913	0	0	12.1739	6.95652	0	1.73913	0	0	0.869565	0	0	0	0	0	0	0	0	0	0	0	1.73913	0	0	0
	2013	Front Porch								22.4
184	2013	Oil Slick	10.0584	2013-03-03	0	2	0	0	52.3077	6.4	13.8462	7.69231	20	2	40	6.15385	8	49.2308	89.2308	0	0	0	0	0	5.38462	0	0	0	1.53846	0	0	0	0	0	0	0	0.769231	0	0	4.61538	12.3077	0	0	4.61538	0	0	23.0769	0	0
185	2013	Oil Slick	10.0584	2013-03-03	1	1	0	0	26.1745	16	13.4228	9.39597	41.6107	2	83.2215	9.39597	5	46.9799	130.201	0	0	0	0	0	1.34228	0	0	0	2.68456	0	0	0	0	2.68456	0	0	1.34228	0	0	0	2.68456	0	0	6.71141	0	0	4.69799	0	0
186	2013	Oil Slick	10.0584	2013-03-03	0	1	0	0	38.4615	3.2	13.4615	5.76923	34.6154	2	69.2308	7.69231	8	61.5385	130.769	0	0	0	0	0	7.69231	21.1538	0	0	2.88462	0	0	0	0	3.84615	0	0	0	0	0	1.92308	0	0	0	0	0	0.961538	0	0	0
187	2013	Oil Slick	10.3632	2013-03-03	0	0	0	0	18.5185	12.8	11.1111	5.55556	51.8519	4	207.407	12.963	20	259.259	466.667	0	0	0	0	0	1.85185	0	0	0	0.925926	0	0	0	0	0.925926	0	0	0	0	3.7037	0	0	0	0	0	0	1.85185	0	0	0
188	2013	Windsock	8.8392	2013-03-04	0	5	0	0	37.5	12.8	1.25	5	41.25	3	123.75	15	6	90	213.75	0	0	0	0	0	11.25	16.25	0	2.5	5	0	0	0	0	0	0	0	0	0	0	0	0	0	0	0	0	2.5	0	0	0
189	2013	Windsock	9.4488	2013-03-04	0	2	0	0	29.0909	0	0	1.81818	47.2727	3	141.818	21.8182	5	109.091	250.909	0	0	0	0	0	9.09091	1.81818	0	5.45455	1.81818	0	0	0	0	3.63636	0	0	0	0	0	0	0	0	5.45455	0	0	1.81818	0	0	0
190	2013	Windsock	10.0584	2013-03-04	0	0	0	0	36.6197	12.8	12.6761	4.22535	19.7183	2	39.4366	26.7606	8	214.085	253.521	0	0	0	0	0	7.04225	7.04225	0	4.22535	4.22535	0	0	4.22535	0	4.22535	0	0	0	0	1.40845	0	0	0	0	0	0	4.22535	0	0	0
191	2013	Windsock	9.144	2013-03-04	0	3	0	0	54.1977	6.4	0.53135	2.65675	26.5675	2	53.135	16.0468	2	32.0935	85.2285	0	0	0	0	0	17.0032	23.3794	0	4.2508	1.0627	0	0	0	0	1.0627	0	0	0	0	1.0627	0	6.3762	0	0	0	0	0	0	0	0
	2013	Windsock								12.8
192	2013	Bachelor's Beach	10.0584	2013-03-04	0	0	0	0	33.3333	3.2	0	3.80952	40	2	80	22.8571	5	114.286	194.286	0	0	0	0	0	18.0952	0	0	9.52381	1.90476	0	0	0	0	1.90476	0	0	0	0	0	0	1.90476	0	0	0	0	0	0	0	0
193	2013	Bachelor's Beach	10.0584	2013-03-04	0	2	0	1	27.5362	6.4	10.1449	5.7971	36.2319	3	108.696	20.2899	10	202.899	311.594	0	0	0	0	0	11.5942	2.89855	0	7.24638	5.7971	0	0	0	0	0	0	0	0	0	0	0	0	0	0	0	0	0	0	0	0
194	2013	Bachelor's Beach	10.668	2013-03-04	0	0	0	0	33.5766	12.8	17.5182	0.729927	24.8175	2	49.635	23.3577	10	233.577	283.212	0	0	0	0	0	2.91971	11.6788	0	0	1.45985	0	5.83942	0	0	0	0	0	0	0	0	0	0	0	8.75912	0	0	0	0	0	0
195	2013	Bachelor's Beach	10.0584	2013-03-04	0	0	0	0	44.7368	16	3.50877	2.63158	31.5789	2	63.1579	17.5439	10	175.439	238.596	0	0	0	0	0	20.1754	0	0	3.50877	8.77193	0	0	0	0	3.50877	0	0	0	0	1.75439	0	5.26316	0	0	0	0	0	0	0	0
	2013	Bachelor's Beach								21.3333
196	2013	18th Palm	9.7536	2013-03-04	0	0	0	0	24.1611	16	18.7919	0.671141	30.8725	4	123.49	25.5034	10	255.034	378.523	0	0	0	0	0	8.05369	5.36913	0	4.02685	5.36913	0	0	0	0	0	0	0	0	0	0	0	0	0	0	0	0	0	0	0	0
197	2013	18th Palm	9.7536	2013-03-04	0	0	0	0	33.7748	6.4	1.10375	3.31126	41.9426	5	209.713	19.8675	10	198.675	408.389	0	0	0	0	0	5.51876	5.51876	0	3.97351	14.3488	0	0	0	1.10375	1.10375	0	0	0	0	0	0	0	0	0	0	0	1.10375	1.10375	0	0
198	2013	18th Palm	10.3632	2013-03-04	0	0	0	0	38	3.2	2	6	20	3	60	34	20	680	740	0	0	0	0	0	0	34	0	2	0	0	0	0	0	2	0	0	0	0	0	0	0	0	0	0	0	0	0	0	0
199	2013	18th Palm	9.144	2013-03-04	0	0	0	0	54.321	25.6	3.7037	2.46914	34.5679	2	69.1358	4.93827	20	98.7654	167.901	0	0	0	0	0	11.1111	8.64198	0	12.3457	7.40741	0	0	0	0	6.17284	0	0	0	0	0	0	0	0	6.17284	0	0	0	0	0	0
	2013	18th Palm								12.8
200	2013	Reef Scientifico	9.4488	2013-03-05	0	2	0	0	51.3514	6.4	6.75676	6.75676	28.3784	1	28.3784	6.75676	5	33.7838	62.1622	0	0	0	0	0	21.6216	0	0	0	14.8649	0	0	0	0	2.7027	0	0	0	0	0	5.40541	6.75676	0	0	0	0	0	0	0	0
201	2013	Reef Scientifico	9.7536	2013-03-05	0	1	0	0	56.5217	0	4.34783	2.17391	26.087	2	52.1739	10.8696	5	54.3478	106.522	0	0	0	0	0	23.913	0	0	4.34783	6.52174	0	0	0	0	0	0	0	0	0	0	0	4.34783	0	8.69565	0	0	8.69565	0	0	0
202	2013	Reef Scientifico	9.144	2013-03-05	0	0	0	0	39.3204	6.4	4.85437	3.64078	41.2621	2	82.5243	7.28155	5	36.4078	300.971	0	0	3.64078	50	182.039	12.1359	0	0	0	3.64078	0	0	0	0	0	0	3.64078	0	0	2.42718	0	0	0	7.28155	0	0	0.485437	0	0	0
203	2013	Reef Scientifico	9.144	2013-03-05	0	0	0	0	48.1013	9.6	5.06329	3.79747	39.2405	2	78.481	3.79747	5	18.9873	97.4684	0	0	0	0	0	18.9873	15.1899	0	0	2.53165	0	0	0	0	0	0	6.32911	0	0	0	0	5.06329	0	0	0	0	0	0	0	0
204	2013	Forest	9.144	2013-03-06	0	0	0	0	45.5556	16	6.66667	14.4444	23.3333	1	23.3333	6.66667	5	33.3333	190	0	0	3.33333	40	133.333	4.44444	7.77778	0	1.11111	2.22222	0	0	0	0	3.33333	0	0	0	0	2.22222	0	0	0	0	1.11111	0	0	23.3333	0	0
205	2013	Forest	9.4488	2013-03-06	0	0	0	0	61.2245	3.2	6.12245	8.16327	19.0476	1	19.0476	4.08163	5	20.4082	66.6667	0	0	1.36054	20	27.2109	9.52381	2.72109	0	0	9.52381	0	0	0	0	0	0	0	1.36054	0	0	0	0	0	0	0	0	0	38.0952	0	0
206	2013	Forest	10.668	2013-03-06	1	0	0	0	54.4974	6.4	5.29101	10.582	20.1058	1	20.1058	8.46561	10	84.6561	125.926	0	0	1.0582	20	21.164	7.40741	11.6402	0	2.1164	4.2328	0	0	0	0	3.7037	1.0582	0	0	0	0	0	0	0	6.34921	2.1164	0	4.2328	11.6402	0	0
207	2013	Forest	9.144	2013-03-06	0	0	0	0	20.7317	12.8	18.2927	15.8537	39.0244	2	78.0488	6.09756	5	30.4878	108.537	0	0	0	0	0	3.65854	8.53659	0	0	2.43902	0	0	0	0	0	0	0	0	0	2.43902	0	0	0	0	0	0	0	3.65854	0	0
	2013	Forest								6.4
208	2013	Barcadera	9.4488	2013-03-06	0	0	0	0	42.8571	0	0	4.3956	43.956	4	175.824	6.59341	10	65.9341	253.847	1.1	1.0989	1.0989	10	10.989	15.3846	19.7802	0	0	0	0	0	0	0	2.1978	0	0	0	0	0	0	0	0	0	0	0	2.1978	3.2967	0	0
209	2013	Barcadera	9.4488	2013-03-06	0	1	0	0	28.3626	0	1.46199	8.77193	46.7836	2	93.5673	8.77193	10	87.7193	187.087	5.8	5.84795	0	0	0	23.9766	0	0	0	4.38596	0	0	0	0	0	0	0	0	0	0	0	0	0	0	0	0	0	0	0	0
210	2013	Barcadera	9.7536	2013-03-06	0	0	0	0	18.0556	9.6	1.38889	6.94444	68.0556	2	136.111	5.55556	10	55.5556	191.667	0	0	0	0	0	0	9.72222	0	0	4.16667	0	0	0	0	1.38889	0	0	1.38889	0	0	1.38889	0	0	0	0	0	0	0	0	0
211	2013	Barcadera	8.5344	2013-03-06	0	0	0	0	31.7073	12.8	0	6.09756	51.2195	3	153.659	7.31707	30	219.512	482.927	0	0	3.65854	30	109.756	6.09756	6.09756	0	6.09756	3.65854	0	0	0	0	3.65854	0	0	0	0	0	0	0	0	6.09756	0	0	0	0	0	0
212	2013	Karpata	8.2296	2013-03-07	0	4	0	0	36.6972	0	11.0092	7.33945	19.2661	2	38.5321	25.6881	20	513.761	552.294	0	0	0	0	0	15.5963	6.42202	0	8.25688	0	0	0	0	0	0.917431	0	0	0	0	0	0	0	0	4.58716	0	0	0	0.917431	0	0
213	2013	Karpata	8.5344	2013-03-07	1	2	0	0	39.6226	9.6	4.71698	8.49057	36.7925	2	73.5849	7.54717	20	150.943	227.328	2.8	2.83019	0	0	0	16.0377	9.43396	0	2.83019	2.83019	0	0	0	0	0	0.943396	2.83019	1.88679	0	0	0	0	0	0	0	0	0	2.83019	0	0
214	2013	Karpata	8.8392	2013-03-07	0	2	0	0	45.3704	3.2	5.55556	13.8889	23.1481	2	46.2963	12.037	20	240.741	287.037	0	0	0	0	0	18.5185	10.1852	0	2.77778	2.77778	0	0.925926	0	0	6.48148	0	0	0	0	2.77778	0	0.925926	0	0	0	0	0	0	0	0
215	2013	Karpata	9.4488	2013-03-07	0	1	0	0	40.1869	3.2	7.47664	15.8879	16.8224	2	33.6449	17.757	20	355.14	390.685	1.9	1.86916	0	0	0	15.8879	1.86916	0	1.86916	5.60748	0	0	0	0	6.54206	0	0	0	0	0	0	0	0	8.41121	0	0	0	0	0	0
	2013	Karpata								9.6
216	2013	No Dive Reserve	10.0584	2013-03-07	2	7	0	0	44.8276	9.6	1.97044	14.7783	15.7635	1	15.7635	21.6749	20	433.498	450.261	1	0.985222	0	0	0	12.8079	5.91133	0	1.97044	6.40394	0	0	1.97044	0	3.94089	0	0	0	0	0	0	0	0	0	0	0	0	11.8227	0	0
217	2013	No Dive Reserve	9.144	2013-03-07	0	0	0	0	48.5679	9.6	3.73599	12.4533	21.1706	2	42.3412	14.0722	10	140.722	183.064	0	0	0	0	0	13.6986	11.208	0	2.49066	0	0	1.24533	6.22665	0	2.49066	0	0	1.24533	0	1.24533	0	0	0	0	0	0	1.24533	7.47198	0	0
218	2013	No Dive Reserve	11.2776	2013-03-07	1	0	0	0	41.573	6.4	8.98876	10.1124	26.9663	1	26.9663	12.3596	10	123.596	150.562	0	0	0	0	0	8.98876	31.4607	0	0	0	0	0	0	0	0	0	0	0	0	1.1236	0	0	0	0	0	0	0	0	0	0
219	2013	No Dive Reserve	9.7536	2013-03-07	0	2	0	0	46.0177	16	7.07965	12.3894	16.8142	2	33.6283	17.6991	25	442.478	476.106	0	0	0	0	0	5.30973	17.6991	0	2.65487	1.76991	0	0.884956	3.53982	0	3.53982	0	0	0	0	3.53982	0	0	0	0	0	0	0.884956	6.19469	0	0
	2013	No Dive Reserve								6.4
220	2015	Calabas	10.0584	2015-03-08	0	0	0	0	20	29.3333	2.5	0	65	3	195	12.5	50	625	820	0	0	0	0	0	7.5	2.5	0	2.5	2.5	0	0	0	0	2.5	0	0	0	0	2.5	0	0	0	0	0	0	0	0	0	0
221	2015	Calabas	10.668	2015-03-08	0	0	0	0	46.3415	16	2.43902	2.43902	30.4878	2	60.9756	18.2927	30	548.78	609.756	0	0	0	0	0	14.6341	6.09756	0	6.09756	8.53659	0	0	0	0	4.87805	0	0	0	0	2.43902	0	0	0	0	0	0	0	0	3.65854	0
222	2015	Calabas	10.668	2015-03-08	0	0	0	0	14.0351	25.6	3.50877	1.75439	54.386	2	108.772	26.3158	30	789.474	898.246	0	0	0	0	0	3.50877	8.77193	0	0	1.75439	0	0	0	0	0	0	0	0	0	0	0	0	0	0	0	0	0	0	0	0
223	2015	Calabas	10.668	2015-03-08	0	0	0	0	49.2958	19.2	0	2.8169	29.5775	3	88.7324	18.3099	30	549.296	638.028	0	0	0	0	0	21.1268	8.4507	0	8.4507	8.4507	0	0	2.8169	0	0	0	0	0	0	0	0	0	0	0	0	0	0	0	0	0
224	2015	Front Porch	11.2776	2015-03-08	0	0	0	0	56	19.2	2.66667	8	4	3	12	29.3333	10	293.333	305.333	0	0	0	0	0	5.33333	0	0	24	16	0	0	0	0	0	0	0	0	0	5.33333	0	0	0	0	0	0	0	0	5.33333	0
225	2015	Front Porch	9.7536	2015-03-08	0	0	0	0	25	24	13.2353	2.94118	48.5294	3	145.588	10.2941	10	102.941	248.529	0	0	0	0	0	1.47059	2.94118	0	4.41176	14.7059	0	0	0	0	0	0	0	0	0	0	0	0	0	0	0	0	1.47059	0	0	0
226	2015	Front Porch	10.3632	2015-03-08	0	0	0	0	31.0345	22.4	20.6897	3.44828	37.931	2	75.8621	5.17241	7	36.2069	129.31	0	0	1.72414	10	17.2414	1.72414	0	0	10.3448	3.44828	0	0	0	0	1.72414	0	0	0	0	1.72414	0	8.62069	0	0	0	0	1.72414	0	0	0
227	2015	Front Porch	10.668	2015-03-08	1	0	0	0	32.3529	22.4	19.1176	2.94118	35.2941	3	105.882	8.82353	5	44.1176	164.706	0	0	1.47059	10	14.7059	14.7059	4.41176	0	2.94118	2.94118	0	0	0	0	1.47059	0	0	0	0	5.88235	0	0	0	0	0	0	0	0	0	0
228	2015	18th Palm	9.4488	2015-03-09	0	0	0	0	20.6107	16	4.58015	12.2137	41.2214	2	82.4427	21.374	10	213.74	296.183	0	0	0	0	0	15.2672	0	0	0	5.34351	0	0	0	0	0	0	0	0	0	0	0	0	0	0	0	0	0	0	0	0
229	2015	18th Palm	10.668	2015-03-09	0	0	0	0	12.0879	25.6	8.79121	8.79121	48.3516	2	96.7033	21.978	10	219.78	316.484	0	0	0	0	0	0	8.79121	0	0	0	0	0	0	0	1.0989	0	0	0	0	2.1978	0	0	0	0	0	0	0	0	0	0
230	2015	18th Palm	10.3632	2015-03-09	0	0	0	0	39.6226	22.4	3.77358	3.77358	37.7358	1	37.7358	13.2075	5	66.0377	103.774	0	1.88679	0	0	0	0	11.3208	0	16.9811	9.43396	0	0	0	0	1.88679	0	0	0	0	0	0	0	0	0	0	0	0	0	0	0
231	2015	18th Palm	9.4488	2015-03-09	0	0	0	0	35.8209	36.5714	13.4328	5.97015	37.3134	1	37.3134	7.46269	5	37.3134	76.1194	1.49254	0	0	0	0	7.46269	0	0	8.95522	0	0	0	0	0	8.95522	0	0	7.46269	0	1.49254	0	0	0	0	0	0	1.49254	0	0	0
232	2015	Windsock	8.8392	2015-03-10	0	0	0	0	35.8779	24	0	6.10687	47.3282	2	94.6565	10.687	5	53.4351	148.092	0	0	0	0	0	16.7939	4.58015	0	7.63359	0	0	0	0	0	4.58015	0	0	2.29008	0	0	0	0	0	0	0	0	0	0	0	0
233	2015	Windsock	8.8392	2015-03-10	0	0	0	0	26.8293	22.8571	0	7.31707	53.6585	2	107.317	12.1951	10	121.951	229.268	0	0	0	0	0	2.43902	4.87805	0	0	0	0	0	0	0	4.87805	0	0	0	0	2.43902	0	0	0	0	0	0	0	0	0	0
234	2015	Windsock	9.7536	2015-03-10	0	0	0	0	38.1818	13.3333	12.7273	5.45455	36.3636	2	72.7273	7.27273	5	36.3636	109.091	0	0	0	0	0	20	0	0	0	0	0	0	3.63636	0	0	0	0	1.81818	0	1.81818	0	0	0	0	0	0	0	0	10.9091	0
235	2015	Windsock	9.144	2015-03-10	0	0	0	0	49.2958	25.6	2.8169	5.6338	33.8028	2	67.6056	7.04225	5	35.2113	104.225	1.40845	1.40845	0	0	0	19.7183	8.4507	0	5.6338	0	0	0	0	0	0	0	0	0	0	5.6338	0	8.4507	0	0	0	0	0	1.40845	0	0
236	2015	Bachelor's Beach	10.0584	2015-03-10	0	0	0	0	25	16	4.41176	14.7059	47.0588	2	94.1176	8.82353	5	44.1176	138.235	0	0	0	0	0	7.35294	8.82353	0	0	1.47059	0	0	0	0	1.47059	0	0	4.41176	0	0	0	0	0	0	0	0	1.47059	0	0	0
237	2015	Bachelor's Beach	10.0584	2015-03-10	0	0	0	0	32.3944	16	12.6761	11.2676	36.6197	1	36.6197	5.6338	5	28.169	66.1972	1.40845	1.40845	0	0	0	9.85915	0	0	0	0	0	0	0	0	0	0	0	0	0	4.22535	0	0	0	16.9014	1.40845	0	0	0	0	0
238	2015	Bachelor's Beach	9.4488	2015-03-10	0	0	0	0	41.1765	6.4	12.9412	5.88235	23.5294	1	23.5294	16.4706	10	164.706	188.235	0	0	0	0	0	17.6471	7.05882	5.88235	0	2.35294	0	0	0	0	0	0	0	0	0	2.35294	2.35294	0	0	3.52941	0	0	0	0	0	0
239	2015	Bachelor's Beach	10.0584	2015-03-10	0	0	0	0	35.7143	9.6	9.52381	5.95238	41.6667	2	83.3333	5.95238	5	29.7619	114.286	1.19048	1.19048	0	0	0	13.0952	4.7619	0	1.19048	9.52381	0	0	0	0	0	0	0	2.38095	0	0	0	0	0	4.7619	0	0	0	0	0	0
240	2015	Oil Slick	10.3632	2015-03-09	0	0	0	0	50.6494	12.8	7.79221	15.5844	20.7792	1	20.7792	5.19481	10	51.9481	72.7273	0	0	0	0	0	1.2987	6.49351	0	0	1.2987	0	0	7.79221	0	2.5974	0	0	10.3896	0	1.2987	3.8961	6.49351	0	3.8961	0	0	0	3.8961	0	0
241	2015	Oil Slick	9.4488	2015-03-09	0	0	0	0	32.3944	12.8	2.8169	14.0845	40.8451	2	81.6901	5.6338	10	56.338	138.028	0	4.22535	0	0	0	12.6761	2.8169	0	0	4.22535	0	1.40845	0	0	0	0	0	0	0	0	0	11.2676	0	0	0	0	0	0	0	0
242	2015	Oil Slick	10.0584	2015-03-09	0	0	0	0	25.3165	19.2	10.1266	13.9241	44.3038	2	88.6076	6.32911	10	63.2911	151.899	0	0	0	0	0	1.26582	0	0	0	0	0	5.06329	0	0	1.26582	0	0	0	0	0	7.59494	10.1266	0	0	0	0	0	0	0	0
243	2015	Oil Slick	10.3632	2015-03-09	0	0	0	0	11.6279	3.2	11.6279	6.97674	44.186	2	88.3721	25.5814	10	255.814	344.186	0	0	0	0	0	0	0	0	0	0	0	0	0	0	0	0	0	0	0	4.65116	0	0	0	0	6.97674	0	0	0	0	0
244	2015	Reef Scientifico	10.0584	2015-03-09	0	0	0	0	22.973	16	10.8108	18.9189	37.8378	3	113.514	9.45946	5	47.2973	160.811	0	0	0	0	0	10.8108	0	0	0	2.02703	0	0	0	0	0	0	0	4.05405	0	1.35135	0	1.35135	0	0	0	0	0	0	0	0
245	2015	Reef Scientifico	10.0584	2015-03-09	0	0	0	0	46.5116	16	3.87597	3.10078	41.8605	2	83.7209	4.65116	5	23.2558	106.977	0	0	0	0	0	6.20155	13.9535	0	12.4031	4.65116	0	0	0	0	0	0	0	1.55039	0	1.55039	0	3.10078	0	0	0	0	0	0	0	0
246	2015	Reef Scientifico	10.0584	2015-03-09	0	0	0	0	47.482	12.8	1.43885	4.31655	43.1655	1	43.1655	3.59712	5	17.9856	61.1511	0	0	0	0	0	5.7554	23.0216	0	4.31655	0	0	0	8.63309	0	1.43885	0	0	0	0	0	0	0	0	0	0	0	0	0	0	0
247	2015	Reef Scientifico	10.0584	2015-03-09	0	0	0	0	40	6.4	1.66667	6.66667	41.6667	2	83.3333	10	5	50	133.333	0	0	0	0	0	21.6667	5	0	5	1.66667	0	0	3.33333	0	0	0	0	0	0	0	0	3.33333	0	0	0	0	0	0	0	0
248	2015	Forest	9.144	2013-03-06	0	0	0	0	53.4031	12.8	8.37696	16.7539	19.8953	1	19.8953	1.57068	5	7.8534	27.7487	0	0	0	0	0	4.18848	4.18848	0	3.14136	1.04712	0	0	0	0	0	0	0	0	0	1.04712	0	0	0	0	0	0	0	39.7906	0	0
249	2015	Forest	9.144	2013-03-06	0	0	0	0	54.2169	12.8	10.8434	7.22892	27.7108	1	27.7108	0	0	0	27.7108	0	0	0	0	0	1.20482	6.0241	4.81928	0	4.81928	0	0	0	0	0	0	0	0	0	1.20482	0	0	0	4.81928	0	0	0	31.3253	0	0
250	2015	Forest	9.4488	2013-03-06	0	0	0	0	44.9438	12.8	13.4831	3.37079	34.8315	2	69.6629	3.37079	5	16.8539	86.5169	0	0	0	0	0	1.1236	6.74157	0	0	4.49438	0	0	0	0	0	0	0	0	0	0	0	0	0	3.37079	1.1236	0	0	28.0899	0	0
251	2015	Forest	8.8392	2013-03-06	0	0	0	0	46.1538	25.6	15.3846	7.69231	28.2051	1	28.2051	1.28205	5	6.41026	47.4359	0	0	1.28205	10	12.8205	0	0	0	0	5.12821	0	0	3.84615	0	0	3.84615	0	0	0	0	0	0	0	1.28205	0	0	0	32.0513	0	0
252	2015	Barcadera	9.4488	2015-03-11	0	0	0	0	40.5714	16	11.4286	16	26.2857	2	52.5714	4.57143	2	9.14286	65.1429	3.42857	1.14286	0	0	0	5.71429	17.1429	0	3.42857	1.14286	0	0	5.71429	0	3.42857	0	0	1.14286	0	0	0	0	0	0	0	0	0	0	0	0
253	2015	Barcadera	9.7536	2015-03-11	0	0	0	0	42.1687	22.4	0	8.43373	40.9639	2	81.9277	8.43373	2	16.8675	107.229	8.43373	0	0	0	0	24.0964	13.253	0	0	0	0	0	0	0	0	0	0	0	0	1.20482	0	0	0	0	0	0	0	3.61446	0	0
254	2015	Barcadera	10.0584	2015-03-11	0	0	0	0	56.3218	28.8	1.14943	10.3448	26.4368	3	79.3103	5.74713	3	17.2414	102.299	5.74713	0	0	0	0	34.4828	4.5977	0	4.5977	3.44828	0	0	4.5977	0	2.29885	2.29885	0	0	0	0	0	0	0	0	0	0	0	0	0	0
255	2015	Barcadera	9.7536	2015-03-11	0	0	0	0	22.973	9.6	5.40541	10.8108	54.0541	3	162.162	5.40541	3	16.2162	183.784	5.40541	1.35135	0	0	0	4.05405	16.2162	0	0	0	0	0	0	0	0	0	0	0	0	1.35135	0	0	0	0	1.35135	0	0	0	0	0
256	2015	No Dive Reserve	10.3632	2015-03-12	0	0	0	0	42.0455	20.5714	9.09091	17.0455	13.6364	2	27.2727	15.9091	20	318.182	378.409	10.2273	1.13636	1.13636	20	22.7273	7.95455	3.40909	0	1.13636	0	0	0	4.54545	0	1.13636	0	0	0	0	1.13636	0	0	0	2.27273	0	0	1.13636	19.3182	0	0
257	2015	No Dive Reserve	10.0584	2015-03-12	0	0	0	0	43.617	28.8	5.31915	17.0213	19.1489	1	19.1489	14.8936	20	297.872	330.851	13.8298	0	0	0	0	19.1489	8.51064	0	0	6.38298	0	0	0	0	1.06383	0	0	0	0	1.06383	0	0	0	3.19149	0	0	0	4.25532	0	0
258	2015	No Dive Reserve	10.0584	2015-03-12	0	0	0	0	42.1053	22.4	2.10526	15.7895	16.8421	2	33.6842	23.1579	20	463.158	501.053	4.21053	0	0	0	0	7.36842	2.10526	0	0	2.10526	0	0	2.10526	0	7.36842	0	0	0	0	2.10526	0	0	0	0	0	0	0	18.9474	0	0
259	2015	No Dive Reserve	9.7536	2015-03-12	0	0	0	0	71.7647	35.2	0	7.05882	8.23529	1	8.23529	12.9412	10	129.412	147.059	9.41176	0	0	0	0	23.5294	0	0	0	0	0	0	3.52941	0	5.88235	0	0	0	0	2.35294	0	0	0	7.05882	0	0	2.35294	27.0588	0	0
260	2015	Karpata	8.8392	2015-03-12	0	0	0	0	51.7241	24	4.31034	9.48276	22.4138	2	44.8276	12.069	20	241.379	293.103	6.89655	0	0	0	0	9.48276	15.5172	0	6.03448	5.17241	0	0	2.58621	0	0	0	0	3.44828	0	0.862069	0	0	0	5.17241	0	0	0	3.44828	0	0
261	2015	Karpata	8.5344	2015-03-12	0	0	0	0	54.2056	12.8	4.6729	6.54206	24.2991	1	24.2991	10.2804	20	205.607	234.579	4.6729	0	0	0	0	12.1495	4.6729	0	10.2804	2.80374	0	0	0	0	0	0	3.73832	0	0	3.73832	0	2.80374	0	2.80374	0	0	0	11.215	0	0
262	2015	Karpata	8.5344	2015-03-12	0	0	0	0	39.3939	12.8	1.0101	10.101	33.3333	2	66.6667	16.1616	10	161.616	231.313	3.0303	0	0	0	0	14.1414	7.07071	0	3.0303	4.0404	0	0	0	0	1.0101	0	0	0	0	1.0101	0	0	0	0	0	0	1.0101	8.08081	0	0
263	2015	Karpata	9.4488	2015-03-12	0	0	0	0	42.0455	34.6667	6.81818	10.2273	30.6818	1	30.6818	10.2273	10	102.273	135.227	2.27273	0	0	0	0	10.2273	12.5	0	0	0	0	0	4.54545	0	4.54545	0	0	0	0	2.27273	0	0	0	6.81818	1.13636	0	0	0	0	0
264	2017	Calabas	9.7536	2017-03-05	0	0	0	0	36	38.4	0	2	54	1	54	8	20	160	214	0	0	0	0	0	2	6	0	6	6	0	0	0	0	8	0	0	0	0	2	6	0	0	0	0	0	0	0	0	0
265	2017	Calabas	10.3632	2017-03-05	0	0	0	0	13.1579	16	23.6842	0	47.3684	2	94.7368	15.7895	10	157.895	252.632	0	0	0	0	0	2.63158	7.89474	0	0	2.63158	0	0	0	0	0	0	0	0	0	0	0	0	0	0	0	0	0	0	0	0
266	2017	Calabas	10.9728	2017-03-05	0	0	0	0	46.5753	19.2	4.10959	2.73973	39.726	3	119.178	6.84932	20	136.986	256.164	0	0	0	0	0	0	24.6575	0	12.3288	2.73973	0	0	0	0	0	0	0	5.47945	0	1.36986	0	0	0	0	0	0	0	0	0	0
267	2017	Calabas	9.7536	2017-03-05	0	0	0	0	43.5484	16	9.67742	1.6129	35.4839	2	70.9677	1.6129	10	16.129	87.0968	0	8.06452	0	0	0	9.67742	1.6129	0	25.8065	0	0	0	0	0	0	0	0	1.6129	0	4.83871	0	0	0	0	0	0	0	0	0	0
266	2017	Calabas								9.6
267	2017	Calabas								19.2
266	2017	Calabas								44.8
267	2017	Calabas								28.8
268	2017	Front Porch	10.9728	2017-03-05	0	0	0	0	44.2478	16	21.2389	5.30973	26.5487	2	53.0973	1.76991	5	8.84956	61.9469	0	0.884956	0	0	0	0	8.84956	0	10.6195	0	0	0	0	0	3.53982	0	0	0	0	5.30973	10.6195	0	0	0	0	0	0	0	5.30973	0
269	2017	Front Porch	10.3632	2017-03-05	0	0	0	0	48.474	19.2	7.18133	5.386	37.702	2	75.4039	0.897666	15	13.465	88.8689	0	0.359066	0	0	0	8.97666	10.772	0	7.18133	3.59066	0	7.18133	5.386	0	0	0	0	0	0	3.59066	1.79533	0	0	0	0	0	0	0	0	0
270	2017	Front Porch	10.0584	2017-03-05	0	0	0	0	34.188	9.6	13.6752	10.2564	34.188	1.5	51.2821	0.854701	3	2.5641	53.8462	0	6.83761	0	0	0	5.12821	5.12821	0	0	5.12821	0	0	0	0	1.7094	0	0	0	0	0	0	11.9658	0	0	0	0	0	0	5.12821	0
271	2017	Front Porch	10.0584	2017-03-05	0	0	0	0	52.8571	3.2	5.71429	5.71429	30	1	30	0	0	0	30	0	5.71429	0	0	0	12.8571	10	0	12.8571	2.85714	0	4.28571	4.28571	0	2.85714	0	0	0	0	0	0	0	0	0	0	0	0	0	0	0
270	2017	Front Porch								25.6
271	2017	Front Porch								28.8
270	2017	Front Porch								9.6
271	2017	Front Porch								9.6
272	2017	Oil Slick	9.7536	2017-03-06	0	0	0	0	49.4253	9.6	3.44828	10.3448	26.4368	1	26.4368	5.74713	10	57.4713	83.908	0	4.5977	0	0	0	22.9885	0	0	0	4.5977	0	0	0	0	0	0	0	0	0	0	0	3.44828	0	4.5977	0	0	0	13.7931	0	0
273	2017	Oil Slick	10.668	2017-03-06	0	0	0	0	28.169	38.4	7.04225	11.2676	36.6197	1.5	54.9296	11.2676	20	225.352	280.282	0	5.6338	0	0	0	2.8169	2.8169	0	5.6338	1.40845	0	1.40845	1.40845	0	0	0	0	0	0	0	0	0	0	2.8169	4.22535	0	1.40845	0	0	0
274	2017	Oil Slick	10.0584	2017-03-06	0	0	0	0	65.2174	19.2	4.34783	4.34783	17.3913	1	17.3913	4.34783	5	21.7391	39.1304	0	4.34783	0	0	0	0	7.24638	0	0	10.1449	0	0	0	0	0	1.44928	8.69565	0	0	0	4.34783	13.0435	0	0	2.89855	0	0	17.3913	0	0
275	2017	Oil Slick	10.9728	2017-03-06	0	0	0	0	44.1176	32	2.94118	13.2353	22.0588	2	44.1176	14.7059	20	294.118	342.647	4.41176	2.94118	0	0	0	1.47059	14.7059	0	7.35294	1.47059	0	0	0	0	0	0	0	0	0	2.94118	4.41176	0	0	4.41176	1.47059	0	0	1.47059	0	0
272	2017	Oil Slick								35.2
273	2017	Oil Slick								19.2
274	2017	Oil Slick								9.6
275	2017	Oil Slick								19.2
276	2017	Reef Scientifico	9.7536	2017-03-06	0	0	0	0	55.0296	38.4	8.28402	3.5503	27.2189	2	54.4379	3.5503	10	35.503	89.9408	0	2.36686	0	0	0	16.568	10.0592	0	2.36686	13.0178	0	0	3.5503	0	1.18343	0	0	0	0	0	4.73373	3.5503	0	0	0	0	0	0	0	0
277	2017	Reef Scientifico	9.4488	2017-03-06	0	0	0	0	39.2857	12.8	7.14286	1.78571	41.0714	2	82.1429	1.78571	10	17.8571	100	0	8.92857	0	0	0	0	10.7143	0	10.7143	0	0	0	0	0	3.57143	0	0	0	0	0	0	1.78571	0	3.57143	3.57143	0	0	0	1.78571	0
278	2017	Reef Scientifico	9.144	2017-03-06	0	0	0	0	58.4615	16	6.15385	3.07692	29.2308	1	29.2308	1.53846	5	7.69231	36.9231	0	1.53846	0	0	0	40	0	0	12.3077	1.53846	0	0	0	0	1.53846	0	0	0	0	0	0	0	0	0	0	0	0	0	0	0
279	2017	Reef Scientifico	8.5344	2017-03-06	0	0	0	0	41.1215	25.6	3.73832	1.86916	50.4673	2	100.935	2.80374	5	14.0187	114.953	0	0	0	0	0	5.60748	7.47664	0	7.47664	0	0	0	0	0	0	0	0	0	0	0	0	0	0	14.9533	0	0	0	0	3.73832	0
	2017	Reef Scientifico								22.4
	2017	Reef Scientifico								28.8
	2017	Reef Scientifico								41.6
	2017	Reef Scientifico								35.2
280	2017	18th Palm	9.144	2017-03-06	0	0	0	0	50	19.2	1.16279	4.65116	36.0465	1	36.0465	5.81395	5	29.0698	65.1163	0	2.32558	0	0	0	10.4651	23.2558	0	0	6.97674	0	0	0	0	0	0	0	0	0	2.32558	0	0	0	2.32558	0	0	0	0	0	0
281	2017	18th Palm	9.7536	2017-03-06	0	0	0	0	44.2857	12.8	7.14286	5.71429	40	2	80	2.85714	2	5.71429	85.7143	0	0	0	0	0	0	0	0	10	15.7143	0	4.28571	0	0	4.28571	0	0	0	0	4.28571	0	0	0	4.28571	0	0	1.42857	0	0	0
282	2017	18th Palm	9.7536	2017-03-06	0	0	0	0	37.2549	22.4	3.92157	17.6471	29.4118	2	58.8235	5.88235	3	17.6471	76.4706	0	5.88235	0	0	0	0	9.80392	0	15.6863	5.88235	0	0	0	0	0	0	0	0	0	0	0	0	0	0	0	0	0	0	5.88235	0
283	2017	18th Palm	8.8392	2017-03-06	0	0	0	0	47.0588	19.2	9.41176	2.35294	31.7647	2	63.5294	7.05882	1	7.05882	70.5882	0	2.35294	0	0	0	20	3.52941	0	3.52941	3.52941	0	0	0	0	2.35294	0	0	0	0	4.70588	0	0	0	4.70588	0	0	4.70588	0	0	0
	2017	18th Palm								16
	2017	18th Palm								32
	2017	18th Palm								12.8
	2017	18th Palm								38.4
284	2017	Bachelor's Beach	10.3632	2017-03-07	0	0	0	0	50	12.8	4.28571	8.57143	25.7143	2	51.4286	8.57143	10	85.7143	137.143	0	2.85714	0	0	0	20	22.8571	0	0	1.42857	0	0	0	0	0	0	0	0	0	5.71429	0	0	0	0	0	0	0	0	0	0
285	2017	Bachelor's Beach	9.144	2017-03-07	0	0	0	0	31.3131	19.2	14.1414	9.09091	36.3636	1.5	54.5455	7.07071	5	35.3535	89.899	0	2.0202	0	0	0	20.202	10.101	0	0	1.0101	0	0	0	0	0	0	0	0	0	0	0	0	0	0	0	0	0	0	0	0
286	2017	Bachelor's Beach	9.7536	2017-03-07	0	0	0	0	55	12.8	6	5	24	2	48	8	10	80	128	0	2	0	0	0	5	17	8	3	4	0	0	0	0	0	0	0	0	0	4	0	2	0	8	0	0	1	0	0	0
287	2017	Bachelor's Beach	11.2776	2017-03-07	0	0	0	0	56	22.4	10	13	17	1.5	25.5	2	5	10	35.5	0	2	0	0	0	27	7	0	4	5	0	0	0	0	0	0	0	0	0	0	0	0	0	2	3	1	3	2	0	0
	2017	Bachelor's Beach								12.8
	2017	Bachelor's Beach								16
	2017	Bachelor's Beach								12.8
	2017	Bachelor's Beach								32
288	2017	Windsock	8.8392	2017-03-07	0	0	0	0	42.6667	25.6	0	5.33333	48	3	144	2.66667	5	13.3333	157.333	0	1.33333	0	0	0	18.6667	8	0	0	10.6667	0	0	0	0	0	0	0	0	0	5.33333	0	0	0	0	0	0	0	0	0	0
289	2017	Windsock	8.5344	2017-03-07	0	0	0	0	34.1463	22.4	0	2.43902	56.0976	3	168.293	2.43902	5	12.1951	180.488	0	4.87805	0	0	0	15.8537	7.31707	0	2.43902	1.21951	0	0	0	0	2.43902	0	0	0	0	2.43902	0	0	0	0	1.21951	0	0	1.21951	0	0
290	2017	Windsock	9.7536	2017-03-07	0	0	0	0	41.6	19.2	0	8	46.4	3	139.2	0.8	5	4	143.2	0	3.2	0	0	0	30.4	0	0	6.4	0	0	0	0	0	1.6	0	0	0	0	0	0	0	0	0	0	0	0	0	0	0
291	2017	Windsock	9.4488	2017-03-07	0	0	0	0	55.6818	35.2	6.81818	3.40909	34.0909	2	68.1818	0	0	0	68.1818	0	0	0	0	0	14.7727	17.0455	0	0	4.54545	0	0	0	0	1.13636	0	0	0	0	6.81818	0	0	0	9.09091	0	0	0	0	2.27273	0
	2017	Windsock								35.2
	2017	Windsock								22.4
	2017	Windsock								22.4
	2017	Windsock								48
292	2017	Forest	9.3	2017-03-08	0	0	0	0	59.375	19.2	2.08333	11.4583	22.9167	1	22.9167	4.16667	5	20.8333	43.75	0	3.125	0	0	0	6.25	11.4583	4.16667	5.20833	3.125	0	0	0	0	1.04167	0	0	0	0	1.04167	0	0	0	0	0	0	0	27.0833	0	0
293	2017	Forest	9.8	2017-03-08	0	0	0	0	53.5211	25.6	16.9014	9.85915	16.9014	1.5	25.3521	2.8169	5	14.0845	39.4366	0	2.8169	0	0	0	5.6338	0	2.8169	4.22535	11.2676	0	0	0	0	0	4.22535	0	0	0	4.22535	0	0	0	5.6338	1.40845	0	0	14.0845	0	0
294	2017	Forest	10.9	2017-03-08	0	0	0	0	69.1358	9.6	6.17284	6.17284	12.3457	2	24.6914	6.17284	5	30.8642	55.5556	0	2.46914	0	0	0	11.1111	22.2222	6.17284	3.7037	9.87654	0	0	0	0	0	0	0	0	0	0	0	0	0	0	0	0	0	16.0494	0	0
295	2017	Forest	9.4	2017-03-08	0	0	0	0	48.1481	19.2	14.8148	8.64198	18.5185	1.5	27.7778	7.40741	5	37.037	66.0494	1.23457	2.46914	0	0	0	0	12.3457	3.7037	0	4.93827	0	0	0	0	0	0	0	0	0	7.40741	0	0	0	0	0	0	2.46914	17.284	0	0
	2017	Forest								19.2
	2017	Forest								19.2
	2017	Forest								38.4
	2017	Forest								16
296	2017	Barcadera	10.0584	2017-03-08	0	0	0	0	25	16	2.94118	5.88235	52.9412	3	158.824	5.88235	15	88.2353	247.059	0	7.35294	0	0	0	0	19.1176	0	0	5.88235	0	0	0	0	0	0	0	0	0	0	0	0	0	0	0	0	0	0	0	0
297	2017	Barcadera	9.144	2017-03-08	0	0	0	0	43.6782	6.4	0	2.29885	35.6322	3	106.897	16.092	20	321.839	428.736	0	2.29885	0	0	0	36.7816	0	0	0	1.14943	0	0	0	0	4.5977	0	0	0	0	1.14943	0	0	0	0	0	0	0	0	0	0
298	2017	Barcadera	9.7536	2017-03-08	0	0	0	0	48.1928	0	0	6.0241	38.5542	2	77.1084	6.0241	20	120.482	200	2.40964	1.20482	0	0	0	9.63855	0	0	6.0241	10.8434	0	0	0	0	6.0241	0	0	0	0	6.0241	0	3.61446	0	0	2.40964	0	0	0	3.61446	0
299	2017	Barcadera	9.7536	2017-03-08	0	0	0	0	33.3333	19.2	0	6.66667	51.1111	3	153.333	8.88889	20	177.778	334.444	3.33333	0	0	0	0	14.4444	4.44444	1.11111	4.44444	3.33333	0	0	0	0	0	0	0	0	0	0	0	0	0	0	1.11111	0	0	0	4.44444	0
	2017	Barcadera								6.4
	2017	Barcadera								16
	2017	Barcadera								25.6
	2017	Barcadera								35.2
300	2017	Karpata	8.2296	2017-03-09	0	0	0	0	65	0	2	6	21	1	21	5	5	25	46	0	1	0	0	0	18	26	0	0	0	0	0	0	0	0	0	0	2	0	5	0	0	0	0	4	0	0	10	0	0
301	2017	Karpata	7.62	2017-03-09	0	0	0	0	51.2195	12.8	3.65854	9.7561	28.0488	1.5	42.0732	7.31707	10	73.1707	115.244	0	0	0	0	0	23.1707	3.65854	0	0	7.31707	0	0	0	0	0	2.43902	0	0	0	0	0	3.65854	0	4.87805	0	0	1.21951	4.87805	0	0
302	2017	Karpata	8.5344	2017-03-09	0	0	0	0	65.9794	25.6	3.09278	7.21649	19.5876	2	39.1753	4.12371	10	41.2371	85.567	5.15464	0	0	0	0	22.6804	10.3093	0	3.09278	7.21649	0	0	1.03093	0	3.09278	0	0	0	0	1.03093	0	0	0	9.27835	2.06186	0	0	6.18557	0	0
303	2017	Karpata	7.9248	2017-03-09	0	0	0	0	56.962	44.8	2.53165	7.59494	15.1899	2	30.3797	15.1899	20	303.797	340.506	6.32911	2.53165	0	0	0	36.7089	5.06329	0	0	2.53165	0	0	0	0	2.53165	0	0	0	0	0	0	0	0	6.32911	0	0	0	3.79747	0	0
	2017	Karpata								35.2
	2017	Karpata								16
	2017	Karpata								9.6
	2017	Karpata								22.4
304	2017	No Dive Reserve	10.0584	2017-03-09	0	0	0	0	50.5	9.6	7.5	8	15	2	30	17	15	255	317	2	1	1	30	30	17	0	0	3	9	0	0	0	0	2.5	1	0	0	0	0	0	0	0	0	0	0	0	18	0	0
305	2017	No Dive Reserve	10.0584	2017-03-09	0	0	0	0	56.5566	19.2	5.00501	10.4104	15.015	2	30.03	10.01	20	200.2	283.784	3.5035	0.500501	2.5025	20	50.0501	16.016	8.00801	3.003	3.003	4.004	0	0	0	0	4.5045	0	0	2.002	0	2.002	0	0	0	0	0	0	2.002	11.011	0	0
306	2017	No Dive Reserve	9.144	2017-03-09	0	0	0	0	52.3316	35.2	6.21762	6.21762	23.8342	2	47.6684	9.32642	10	93.2642	167.876	6.21762	1.03627	1.03627	20	20.7254	6.21762	12.4352	0	0	2.59067	0	0	0	0	5.18135	1.03627	0	0	0	2.07254	0	0	0	0	2.07254	0	0	20.7254	0	0
307	2017	No Dive Reserve	10.3632	2017-03-09	0	0	0	0	56.5928	25.6	0	25.6709	13.0688	1	13.0688	4.66744	20	93.3489	115.753	9.33489	0	0	0	0	16.9195	11.6686	3.50058	0	0	0	0	0	0	3.50058	0	0	0	0	2.33372	0	0	0	0	0	0	0	18.6698	0	0
	2017	No Dive Reserve								28.8
	2017	No Dive Reserve								19.2															307
	2017	No Dive Reserve								28.8
	2017	No Dive Reserve								25.6
[truncated: 6 more columns]
