# Supplementary material
Source: Frontiers journal article supplement (https://www.frontiersin.org/articles/451072)
Supplement: Table_2.xlsx [file Table_2.xlsx]

## Sheet: Metadata
Bonaire Report, 2017
Status and Trends of Herbivorous Fish
R. Boenish & M. Wilson
Data collection: March, 2017
Divers: Molly Wilson & Robert Boenish
Methodology: fish identification and sizing via belt transects (30m long by 4m wide)
Species: see 'Species List'
Length-weight conversion equations:
W=10^(a+(b*LOG(L*10)/LOG(10))
W= g L=cm
From Bohnsack & Harper, 1998, Mumby modifications. Consistent with S. Arnold in 2013-2015 Report. See 'Species List' for a and b values by species.
Notes:
* Data from 2003 did not add up to 2003 average reported in subsequent reports, nor did reported Bonaire average in 2003 summary correspond with transect-level summaries. New site and Bonaire-level averages were calculated from individual species biomasses reported for each transect

## Sheet: Raw_Data_2011-2017
Date	Site	Transect	Code	Species	length (cm)	Phase	a	b	Biomass	Family
2011	Bachelor's Beach	1	ocs	Acanthurus bahianus	17		-4.6005	2.9752	108.525	Acanthuridae
2011	Bachelor's Beach	1	ytd	Microspathodon chrysurus	18		-4.7033	3.0825	177.246	Pomacentridae
2011	Bachelor's Beach	1	prp	Scarus taeniopterus	25	t	-3.2257	2.3852	311.793	Scaridae
2011	Bachelor's Beach	1	prp	Scarus taeniopterus	30	t	-3.2257	2.3852	481.648	Scaridae
2011	Bachelor's Beach	1	qup	Scarus vetula	22	i	-5.0162	3.1109	186.57	Scaridae
2011	Bachelor's Beach	1	qup	Scarus vetula	30	i	-5.0162	3.1109	489.64	Scaridae
2011	Bachelor's Beach	1	qup	Scarus vetula	33	t	-5.0162	3.1109	658.635	Scaridae
2011	Bachelor's Beach	1	rdp	Sparisoma aurofrenatum	19	i	-4.0781	2.7438	149.398	Scaridae
2011	Bachelor's Beach	1	stop	Sparisoma viride	26	i	-4.4317	2.9051	383.742	Scaridae
2011	Bachelor's Beach	1	stop	Sparisoma viride	26	i	-4.4317	2.9051	383.742	Scaridae
2011	Bachelor's Beach	2	ocs	Acanthurus bahianus	18		-4.6005	2.9752	128.643	Acanthuridae
2011	Bachelor's Beach	2	ocs	Acanthurus bahianus	18		-4.6005	2.9752	128.643	Acanthuridae
2011	Bachelor's Beach	2	ytd	Microspathodon chrysurus	18		-4.7033	3.0825	177.246	Pomacentridae
2011	Bachelor's Beach	2	strp	Scarus iseri	12	i	-4.8887	3.0548	29.0257	Scaridae
2011	Bachelor's Beach	2	strp	Scarus iseri	15	i	-4.8887	3.0548	57.3883	Scaridae
2011	Bachelor's Beach	2	strp	Scarus iseri	4	j	-4.8887	3.0548	1.01222	Scaridae
2011	Bachelor's Beach	2	strp	Scarus iseri	4	j	-4.8887	3.0548	1.01222	Scaridae
2011	Bachelor's Beach	2	strp	Scarus iseri	4	j	-4.8887	3.0548	1.01222	Scaridae
2011	Bachelor's Beach	2	strp	Scarus iseri	4	j	-4.8887	3.0548	1.01222	Scaridae
2011	Bachelor's Beach	2	strp	Scarus iseri	4	j	-4.8887	3.0548	1.01222	Scaridae
2011	Bachelor's Beach	2	strp	Scarus iseri	4	j	-4.8887	3.0548	1.01222	Scaridae
2011	Bachelor's Beach	2	strp	Scarus iseri	4	j	-4.8887	3.0548	1.01222	Scaridae
2011	Bachelor's Beach	2	strp	Scarus iseri	4	j	-4.8887	3.0548	1.01222	Scaridae
2011	Bachelor's Beach	2	strp	Scarus iseri	4	j	-4.8887	3.0548	1.01222	Scaridae
2011	Bachelor's Beach	2	strp	Scarus iseri	4	j	-4.8887	3.0548	1.01222	Scaridae
2011	Bachelor's Beach	2	strp	Scarus iseri	23	t	-4.8887	3.0548	211.79	Scaridae
2011	Bachelor's Beach	2	prp	Scarus taeniopterus	23	t	-3.2257	2.3852	255.56	Scaridae
2011	Bachelor's Beach	2	rdp	Sparisoma aurofrenatum	20	i	-4.0781	2.7438	171.975	Scaridae
2011	Bachelor's Beach	2	rdp	Sparisoma aurofrenatum	20	i	-4.0781	2.7438	171.975	Scaridae
2011	Bachelor's Beach	2	stop	Sparisoma viride	30	i	-4.4317	2.9051	581.547	Scaridae
2011	Bachelor's Beach	2	stop	Sparisoma viride	32	t	-4.4317	2.9051	701.473	Scaridae
2011	Bachelor's Beach	3	blt	Acanthurus coeruleus	20		-2.8242	2.2638	242.589	Acanthuridae
2011	Bachelor's Beach	3	strp	Scarus iseri	13	j	-4.8887	3.0548	37.0659	Scaridae
2011	Bachelor's Beach	3	strp	Scarus iseri	20	t	-4.8887	3.0548	138.193	Scaridae
2011	Bachelor's Beach	3	prp	Scarus taeniopterus	18	i	-3.2257	2.3852	142.422	Scaridae
2011	Bachelor's Beach	3	prp	Scarus taeniopterus	19	i	-3.2257	2.3852	162.025	Scaridae
2011	Bachelor's Beach	3	prp	Scarus taeniopterus	22	i	-3.2257	2.3852	229.851	Scaridae
2011	Bachelor's Beach	3	prp	Scarus taeniopterus	23	i	-3.2257	2.3852	255.56	Scaridae
2011	Bachelor's Beach	3	prp	Scarus taeniopterus	23	t	-3.2257	2.3852	255.56	Scaridae
2011	Bachelor's Beach	3	qup	Scarus vetula	25	i	-5.0162	3.1109	277.684	Scaridae
2011	Bachelor's Beach	3	qup	Scarus vetula	27	i	-5.0162	3.1109	352.801	Scaridae
2011	Bachelor's Beach	3	rdp	Sparisoma aurofrenatum	18	i	-4.0781	2.7438	128.8	Scaridae
2011	Bachelor's Beach	3	stop	Sparisoma viride	28	i	-4.4317	2.9051	475.925	Scaridae
2011	Bachelor's Beach	3	stop	Sparisoma viride	30	i	-4.4317	2.9051	581.547	Scaridae
2011	Bachelor's Beach	3	stop	Sparisoma viride	32	t	-4.4317	2.9051	701.473	Scaridae
2011	Bachelor's Beach	4	ocs	Acanthurus bahianus	18		-4.6005	2.9752	128.643	Acanthuridae
2011	Bachelor's Beach	4	ytd	Microspathodon chrysurus	13		-4.7033	3.0825	65.0025	Pomacentridae
2011	Bachelor's Beach	4	strp	Scarus iseri	15	i	-4.8887	3.0548	57.3883	Scaridae
2011	Bachelor's Beach	4	strp	Scarus iseri	18	i	-4.8887	3.0548	100.163	Scaridae
2011	Bachelor's Beach	4	prp	Scarus taeniopterus	20	i	-3.2257	2.3852	183.112	Scaridae
2011	Bachelor's Beach	4	prp	Scarus taeniopterus	23	t	-3.2257	2.3852	255.56	Scaridae
2011	Bachelor's Beach	4	qup	Scarus vetula	32	i	-5.0162	3.1109	598.51	Scaridae
2011	Bachelor's Beach	4	qup	Scarus vetula	32	i	-5.0162	3.1109	598.51	Scaridae
2011	Bachelor's Beach	4	rdp	Sparisoma aurofrenatum	20	t	-4.0781	2.7438	171.975	Scaridae
2011	Bachelor's Beach	4	stop	Sparisoma viride	30	i	-4.4317	2.9051	581.547	Scaridae
2011	Bachelor's Beach	5	blt	Acanthurus coeruleus	18		-2.8242	2.2638	191.111	Acanthuridae
2011	Bachelor's Beach	5	ytd	Microspathodon chrysurus	13		-4.7033	3.0825	65.0025	Pomacentridae
2011	Bachelor's Beach	5	ytd	Microspathodon chrysurus	13		-4.7033	3.0825	65.0025	Pomacentridae
2011	Bachelor's Beach	5	strp	Scarus iseri	16	i	-4.8887	3.0548	69.8949	Scaridae
2011	Bachelor's Beach	5	qup	Scarus vetula	20	i	-5.0162	3.1109	138.699	Scaridae
2011	Bachelor's Beach	5	qup	Scarus vetula	30	i	-5.0162	3.1109	489.64	Scaridae
2011	Bachelor's Beach	5	stop	Sparisoma viride	10	i	-4.4317	2.9051	23.9056	Scaridae
2011	Bachelor's Beach	5	stop	Sparisoma viride	26	i	-4.4317	2.9051	383.742	Scaridae
2011	Bachelor's Beach	5	stop	Sparisoma viride	27	i	-4.4317	2.9051	428.208	Scaridae
2011	Bachelor's Beach	5	stop	Sparisoma viride	32	t	-4.4317	2.9051	701.473	Scaridae
2011	Bachelor's Beach	6	ocs	Acanthurus bahianus	18		-4.6005	2.9752	128.643	Acanthuridae
2011	Bachelor's Beach	6	blt	Acanthurus coeruleus	17		-2.8242	2.2638	167.915	Acanthuridae
2011	Bachelor's Beach	6	blt	Acanthurus coeruleus	18		-2.8242	2.2638	191.111	Acanthuridae
2011	Bachelor's Beach	6	ytd	Microspathodon chrysurus	18		-4.7033	3.0825	177.246	Pomacentridae
2011	Bachelor's Beach	6	prp	Scarus taeniopterus	18	i	-3.2257	2.3852	142.422	Scaridae
2011	Bachelor's Beach	6	prp	Scarus taeniopterus	20	i	-3.2257	2.3852	183.112	Scaridae
2011	Bachelor's Beach	6	prp	Scarus taeniopterus	20	i	-3.2257	2.3852	183.112	Scaridae
2011	Bachelor's Beach	6	prp	Scarus taeniopterus	20	i	-3.2257	2.3852	183.112	Scaridae
2011	Bachelor's Beach	6	prp	Scarus taeniopterus	22	i	-3.2257	2.3852	229.851	Scaridae
2011	Bachelor's Beach	6	qup	Scarus vetula	30	i	-5.0162	3.1109	489.64	Scaridae
2011	Bachelor's Beach	6	qup	Scarus vetula	30	i	-5.0162	3.1109	489.64	Scaridae
2011	Bachelor's Beach	6	qup	Scarus vetula	32	i	-5.0162	3.1109	598.51	Scaridae
2011	Bachelor's Beach	6	qup	Scarus vetula	27	t	-5.0162	3.1109	352.801	Scaridae
2011	Bachelor's Beach	6	qup	Scarus vetula	27	t	-5.0162	3.1109	352.801	Scaridae
2011	Bachelor's Beach	6	qup	Scarus vetula	27	t	-5.0162	3.1109	352.801	Scaridae
2011	Bachelor's Beach	6	qup	Scarus vetula	27	t	-5.0162	3.1109	352.801	Scaridae
2011	Bachelor's Beach	6	rdp	Sparisoma aurofrenatum	15	t	-4.0781	2.7438	78.1015	Scaridae
2011	Bachelor's Beach	6	rdp	Sparisoma aurofrenatum	20	t	-4.0781	2.7438	171.975	Scaridae
2011	Bachelor's Beach	6	stop	Sparisoma viride	12	i	-4.4317	2.9051	40.6003	Scaridae
2011	Bachelor's Beach	6	stop	Sparisoma viride	25	i	-4.4317	2.9051	342.417	Scaridae
2011	Bachelor's Beach	6	stop	Sparisoma viride	30	i	-4.4317	2.9051	581.547	Scaridae
2011	Bachelor's Beach	6	stop	Sparisoma viride	30	i	-4.4317	2.9051	581.547	Scaridae
2011	Bachelor's Beach	7	ocs	Acanthurus bahianus	18		-4.6005	2.9752	128.643	Acanthuridae
2011	Bachelor's Beach	7	blt	Acanthurus coeruleus	17		-2.8242	2.2638	167.915	Acanthuridae
2011	Bachelor's Beach	7	blt	Acanthurus coeruleus	18		-2.8242	2.2638	191.111	Acanthuridae
2011	Bachelor's Beach	7	blt	Acanthurus coeruleus	18		-2.8242	2.2638	191.111	Acanthuridae
2011	Bachelor's Beach	7	blt	Acanthurus coeruleus	18		-2.8242	2.2638	191.111	Acanthuridae
2011	Bachelor's Beach	7	ytd	Microspathodon chrysurus	15		-4.7033	3.0825	101.042	Pomacentridae
2011	Bachelor's Beach	7	strp	Scarus iseri	23	t	-4.8887	3.0548	211.79	Scaridae
2011	Bachelor's Beach	7	prp	Scarus taeniopterus	18	i	-3.2257	2.3852	142.422	Scaridae
2011	Bachelor's Beach	7	prp	Scarus taeniopterus	19	i	-3.2257	2.3852	162.025	Scaridae
2011	Bachelor's Beach	7	qup	Scarus vetula	12	i	-5.0162	3.1109	28.309	Scaridae
2011	Bachelor's Beach	7	qup	Scarus vetula	32	t	-5.0162	3.1109	598.51	Scaridae
2011	Bachelor's Beach	7	stop	Sparisoma viride	23	i	-4.4317	2.9051	268.754	Scaridae
2011	Bachelor's Beach	7	stop	Sparisoma viride	28	i	-4.4317	2.9051	475.925	Scaridae
2011	Bachelor's Beach	7	stop	Sparisoma viride	32	t	-4.4317	2.9051	701.473	Scaridae
2011	Bachelor's Beach	7	stop	Sparisoma viride	33	t	-4.4317	2.9051	767.07	Scaridae
2011	Bachelor's Beach	8	ocs	Acanthurus bahianus	17		-4.6005	2.9752	108.525	Acanthuridae
2011	Bachelor's Beach	8	ocs	Acanthurus bahianus	18		-4.6005	2.9752	128.643	Acanthuridae
2011	Bachelor's Beach	8	ocs	Acanthurus bahianus	18		-4.6005	2.9752	128.643	Acanthuridae
2011	Bachelor's Beach	8	dcf	Acanthurus chirurgus	20		-2.4262	2.0768	225.206	Acanthuridae
2011	Bachelor's Beach	8	blt	Acanthurus coeruleus	17		-2.8242	2.2638	167.915	Acanthuridae
2011	Bachelor's Beach	8	blt	Acanthurus coeruleus	18		-2.8242	2.2638	191.111	Acanthuridae
2011	Bachelor's Beach	8	blt	Acanthurus coeruleus	20		-2.8242	2.2638	242.589	Acanthuridae
2011	Bachelor's Beach	8	ytd	Microspathodon chrysurus	13		-4.7033	3.0825	65.0025	Pomacentridae
2011	Bachelor's Beach	8	ytd	Microspathodon chrysurus	15		-4.7033	3.0825	101.042	Pomacentridae
2011	Bachelor's Beach	8	strp	Scarus iseri	20	i	-4.8887	3.0548	138.193	Scaridae
2011	Bachelor's Beach	8	strp	Scarus iseri	23	t	-4.8887	3.0548	211.79	Scaridae
2011	Bachelor's Beach	8	prp	Scarus taeniopterus	10	j	-3.2257	2.3852	35.051	Scaridae
2011	Bachelor's Beach	8	prp	Scarus taeniopterus	23	t	-3.2257	2.3852	255.56	Scaridae
2011	Bachelor's Beach	8	prp	Scarus taeniopterus	23	t	-3.2257	2.3852	255.56	Scaridae
2011	Bachelor's Beach	8	prp	Scarus taeniopterus	23	t	-3.2257	2.3852	255.56	Scaridae
2011	Bachelor's Beach	8	prp	Scarus taeniopterus	25	t	-3.2257	2.3852	311.793	Scaridae
2011	Bachelor's Beach	8	qup	Scarus vetula	28	i	-5.0162	3.1109	395.061	Scaridae
2011	Bachelor's Beach	8	qup	Scarus vetula	10	j	-5.0162	3.1109	16.0546	Scaridae
2011	Bachelor's Beach	8	qup	Scarus vetula	33	t	-5.0162	3.1109	658.635	Scaridae
2011	Bachelor's Beach	8	qup	Scarus vetula	35	t	-5.0162	3.1109	790.936	Scaridae
2011	Bachelor's Beach	8	qup	Scarus vetula	35	t	-5.0162	3.1109	790.936	Scaridae
2011	Bachelor's Beach	8	rdp	Sparisoma aurofrenatum	20	i	-4.0781	2.7438	171.975	Scaridae
2011	Bachelor's Beach	8	rdp	Sparisoma aurofrenatum	20	i	-4.0781	2.7438	171.975	Scaridae
2011	Bachelor's Beach	8	rdp	Sparisoma aurofrenatum	23	t	-4.0781	2.7438	252.353	Scaridae
2011	Bachelor's Beach	8	stop	Sparisoma viride	23	i	-4.4317	2.9051	268.754	Scaridae
2011	Bachelor's Beach	8	stop	Sparisoma viride	32	i	-4.4317	2.9051	701.473	Scaridae
2011	Bachelor's Beach	8	stop	Sparisoma viride	32	t	-4.4317	2.9051	701.473	Scaridae
2011	Bachelor's Beach	8	stop	Sparisoma viride	32	t	-4.4317	2.9051	701.473	Scaridae
2011	Bachelor's Beach	8	ytp	Sparisoma rubripinne	15	t	-4.8701	3.0641	62.7569	Scaridae
2011	Bachelor's Beach	8	ytp	Sparisoma rubripinne	22	t	-4.8701	3.0641	202.916	Scaridae
2011	Bachelor's Beach	8	ytp	Sparisoma rubripinne	22	t	-4.8701	3.0641	202.916	Scaridae
2011	Bachelor's Beach	8	ytp	Sparisoma rubripinne	25	t	-4.8701	3.0641	300.212	Scaridae
2011	Barcadera	1	ytd	Microspathodon chrysurus	17		-4.7033	3.0825	148.614	Pomacentridae
2011	Barcadera	1	strp	Scarus iseri	27	t	-4.8887	3.0548	345.645	Scaridae
2011	Barcadera	1	qup	Scarus vetula	26	i	-5.0162	3.1109	313.719	Scaridae
2011	Barcadera	1	qup	Scarus vetula	30	i	-5.0162	3.1109	489.64	Scaridae
2011	Barcadera	1	qup	Scarus vetula	36	t	-5.0162	3.1109	863.379	Scaridae
2011	Barcadera	1	rdp	Sparisoma aurofrenatum	22	t	-4.0781	2.7438	223.377	Scaridae
2011	Barcadera	1	rdp	Sparisoma aurofrenatum	23	t	-4.0781	2.7438	252.353	Scaridae
2011	Barcadera	1	stop	Sparisoma viride	23	i	-4.4317	2.9051	268.754	Scaridae
2011	Barcadera	1	stop	Sparisoma viride	25	i	-4.4317	2.9051	342.417	Scaridae
2011	Barcadera	2	ytd	Microspathodon chrysurus	13		-4.7033	3.0825	65.0025	Pomacentridae
2011	Barcadera	2	ytd	Microspathodon chrysurus	18		-4.7033	3.0825	177.246	Pomacentridae
2011	Barcadera	2	prp	Scarus taeniopterus	24	t	-3.2257	2.3852	282.865	Scaridae
2011	Barcadera	2	qup	Scarus vetula	32	i	-5.0162	3.1109	598.51	Scaridae
2011	Barcadera	2	qup	Scarus vetula	35	t	-5.0162	3.1109	790.936	Scaridae
2011	Barcadera	2	stop	Sparisoma viride	28	i	-4.4317	2.9051	475.925	Scaridae
2011	Barcadera	2	stop	Sparisoma viride	28	i	-4.4317	2.9051	475.925	Scaridae
2011	Barcadera	2	stop	Sparisoma viride	30	i	-4.4317	2.9051	581.547	Scaridae
2011	Barcadera	3	ytd	Microspathodon chrysurus	15		-4.7033	3.0825	101.042	Pomacentridae
2011	Barcadera	3	ytd	Microspathodon chrysurus	18		-4.7033	3.0825	177.246	Pomacentridae
2011	Barcadera	3	strp	Scarus iseri	20	t	-4.8887	3.0548	138.193	Scaridae
2011	Barcadera	3	strp	Scarus iseri	23	t	-4.8887	3.0548	211.79	Scaridae
2011	Barcadera	3	strp	Scarus iseri	25	t	-4.8887	3.0548	273.229	Scaridae
2011	Barcadera	3	prp	Scarus taeniopterus	20	i	-3.2257	2.3852	183.112	Scaridae
2011	Barcadera	3	prp	Scarus taeniopterus	10	j	-3.2257	2.3852	35.051	Scaridae
2011	Barcadera	3	prp	Scarus taeniopterus	23	t	-3.2257	2.3852	255.56	Scaridae
2011	Barcadera	3	qup	Scarus vetula	26	i	-5.0162	3.1109	313.719	Scaridae
2011	Barcadera	3	qup	Scarus vetula	35	t	-5.0162	3.1109	790.936	Scaridae
2011	Barcadera	3	stop	Sparisoma viride	25	i	-4.4317	2.9051	342.417	Scaridae
2011	Barcadera	3	stop	Sparisoma viride	32	t	-4.4317	2.9051	701.473	Scaridae
2011	Barcadera	4	blt	Acanthurus coeruleus	17		-2.8242	2.2638	167.915	Acanthuridae
2011	Barcadera	4	ytd	Microspathodon chrysurus	13		-4.7033	3.0825	65.0025	Pomacentridae
2011	Barcadera	4	prp	Scarus taeniopterus	12	i	-3.2257	2.3852	54.1456	Scaridae
2011	Barcadera	4	prp	Scarus taeniopterus	20	i	-3.2257	2.3852	183.112	Scaridae
2011	Barcadera	4	prp	Scarus taeniopterus	23	t	-3.2257	2.3852	255.56	Scaridae
2011	Barcadera	4	prp	Scarus taeniopterus	24	t	-3.2257	2.3852	282.865	Scaridae
2011	Barcadera	4	qup	Scarus vetula	35	t	-5.0162	3.1109	790.936	Scaridae
2011	Barcadera	4	qup	Scarus vetula	35	t	-5.0162	3.1109	790.936	Scaridae
2011	Barcadera	4	rdp	Sparisoma aurofrenatum	18	i	-4.0781	2.7438	128.8	Scaridae
2011	Barcadera	4	stop	Sparisoma viride	28	i	-4.4317	2.9051	475.925	Scaridae
2011	Barcadera	4	stop	Sparisoma viride	32	t	-4.4317	2.9051	701.473	Scaridae
2011	Barcadera	5	ytd	Microspathodon chrysurus	12		-4.7033	3.0825	50.7898	Pomacentridae
2011	Barcadera	5	ytd	Microspathodon chrysurus	15		-4.7033	3.0825	101.042	Pomacentridae
2011	Barcadera	5	strp	Scarus iseri	22	t	-4.8887	3.0548	184.898	Scaridae
2011	Barcadera	5	strp	Scarus iseri	23	t	-4.8887	3.0548	211.79	Scaridae
2011	Barcadera	5	strp	Scarus iseri	23	t	-4.8887	3.0548	211.79	Scaridae
2011	Barcadera	5	qup	Scarus vetula	27	i	-5.0162	3.1109	352.801	Scaridae
2011	Barcadera	5	qup	Scarus vetula	34	t	-5.0162	3.1109	722.733	Scaridae
2011	Barcadera	5	qup	Scarus vetula	35	t	-5.0162	3.1109	790.936	Scaridae
2011	Barcadera	5	qup	Scarus vetula	37	t	-5.0162	3.1109	940.197	Scaridae
2011	Barcadera	5	stop	Sparisoma viride	28	i	-4.4317	2.9051	475.925	Scaridae
2011	Barcadera	5	stop	Sparisoma viride	32	t	-4.4317	2.9051	701.473	Scaridae
2011	Barcadera	5	stop	Sparisoma viride	33	t	-4.4317	2.9051	767.07	Scaridae
2011	Barcadera	6	ocs	Acanthurus bahianus	18		-4.6005	2.9752	128.643	Acanthuridae
2011	Barcadera	6	blt	Acanthurus coeruleus	18		-2.8242	2.2638	191.111	Acanthuridae
2011	Barcadera	6	blt	Acanthurus coeruleus	18		-2.8242	2.2638	191.111	Acanthuridae
2011	Barcadera	6	blt	Acanthurus coeruleus	18		-2.8242	2.2638	191.111	Acanthuridae
2011	Barcadera	6	prp	Scarus taeniopterus	28	i	-3.2257	2.3852	408.565	Scaridae
2011	Barcadera	6	prp	Scarus taeniopterus	10	j	-3.2257	2.3852	35.051	Scaridae
2011	Barcadera	6	prp	Scarus taeniopterus	12	j	-3.2257	2.3852	54.1456	Scaridae
2011	Barcadera	6	prp	Scarus taeniopterus	24	t	-3.2257	2.3852	282.865	Scaridae
2011	Barcadera	6	qup	Scarus vetula	25	i	-5.0162	3.1109	277.684	Scaridae
2011	Barcadera	6	qup	Scarus vetula	30	i	-5.0162	3.1109	489.64	Scaridae
2011	Barcadera	6	rdp	Sparisoma aurofrenatum	18	i	-4.0781	2.7438	128.8	Scaridae
2011	Barcadera	6	stop	Sparisoma viride	30	i	-4.4317	2.9051	581.547	Scaridae
2011	Barcadera	6	stop	Sparisoma viride	31	i	-4.4317	2.9051	639.668	Scaridae
2011	Barcadera	6	stop	Sparisoma viride	32	i	-4.4317	2.9051	701.473	Scaridae
2011	Barcadera	7	ocs	Acanthurus bahianus	17		-4.6005	2.9752	108.525	Acanthuridae
2011	Barcadera	7	ocs	Acanthurus bahianus	17		-4.6005	2.9752	108.525	Acanthuridae
2011	Barcadera	7	ytd	Microspathodon chrysurus	17		-4.7033	3.0825	148.614	Pomacentridae
2011	Barcadera	7	strp	Scarus iseri	22	t	-4.8887	3.0548	184.898	Scaridae
2011	Barcadera	7	prp	Scarus taeniopterus	23	t	-3.2257	2.3852	255.56	Scaridae
2011	Barcadera	7	qup	Scarus vetula	22	i	-5.0162	3.1109	186.57	Scaridae
2011	Barcadera	7	qup	Scarus vetula	32	i	-5.0162	3.1109	598.51	Scaridae
2011	Barcadera	7	rdp	Sparisoma aurofrenatum	18	i	-4.0781	2.7438	128.8	Scaridae
2011	Barcadera	7	stop	Sparisoma viride	31	i	-4.4317	2.9051	639.668	Scaridae
2011	Barcadera	7	stop	Sparisoma viride	32	t	-4.4317	2.9051	701.473	Scaridae
2011	Barcadera	7	stop	Sparisoma viride	32	t	-4.4317	2.9051	701.473	Scaridae
2011	Barcadera	7	stop	Sparisoma viride	32	t	-4.4317	2.9051	701.473	Scaridae
2011	Barcadera	8	ocs	Acanthurus bahianus	18		-4.6005	2.9752	128.643	Acanthuridae
2011	Barcadera	8	blt	Acanthurus coeruleus	17		-2.8242	2.2638	167.915	Acanthuridae
2011	Barcadera	8	blt	Acanthurus coeruleus	17		-2.8242	2.2638	167.915	Acanthuridae
2011	Barcadera	8	ytd	Microspathodon chrysurus	15		-4.7033	3.0825	101.042	Pomacentridae
2011	Barcadera	8	ytd	Microspathodon chrysurus	15		-4.7033	3.0825	101.042	Pomacentridae
2011	Barcadera	8	ytd	Microspathodon chrysurus	17		-4.7033	3.0825	148.614	Pomacentridae
2011	Barcadera	8	strp	Scarus iseri	23	t	-4.8887	3.0548	211.79	Scaridae
2011	Barcadera	8	prp	Scarus taeniopterus	23	t	-3.2257	2.3852	255.56	Scaridae
2011	Barcadera	8	qup	Scarus vetula	28	i	-5.0162	3.1109	395.061	Scaridae
2011	Barcadera	8	qup	Scarus vetula	30	i	-5.0162	3.1109	489.64	Scaridae
2011	Barcadera	8	rdp	Sparisoma aurofrenatum	20	i	-4.0781	2.7438	171.975	Scaridae
2011	Barcadera	8	stop	Sparisoma viride	30	i	-4.4317	2.9051	581.547	Scaridae
2011	Barcadera	8	stop	Sparisoma viride	31	i	-4.4317	2.9051	639.668	Scaridae
2011	Barcadera	8	stop	Sparisoma viride	32	i	-4.4317	2.9051	701.473	Scaridae
2011	Barcadera	8	stop	Sparisoma viride	32	t	-4.4317	2.9051	701.473	Scaridae
2011	Calabas	1	blt	Acanthurus coeruleus	18		-2.8242	2.2638	191.111	Acanthuridae
2011	Calabas	1	blt	Acanthurus coeruleus	18		-2.8242	2.2638	191.111	Acanthuridae
2011	Calabas	1	blt	Acanthurus coeruleus	20		-2.8242	2.2638	242.589	Acanthuridae
2011	Calabas	1	blt	Acanthurus coeruleus	23		-2.8242	2.2638	332.874	Acanthuridae
2011	Calabas	1	prp	Scarus taeniopterus	13	i	-3.2257	2.3852	65.5357	Scaridae
2011	Calabas	1	prp	Scarus taeniopterus	19	i	-3.2257	2.3852	162.025	Scaridae
2011	Calabas	1	prp	Scarus taeniopterus	19	i	-3.2257	2.3852	162.025	Scaridae
2011	Calabas	1	prp	Scarus taeniopterus	21	i	-3.2257	2.3852	205.711	Scaridae
2011	Calabas	1	prp	Scarus taeniopterus	23	i	-3.2257	2.3852	255.56	Scaridae
2011	Calabas	1	prp	Scarus taeniopterus	23	i	-3.2257	2.3852	255.56	Scaridae
2011	Calabas	1	prp	Scarus taeniopterus	22	t	-3.2257	2.3852	229.851	Scaridae
2011	Calabas	1	qup	Scarus vetula	12	j	-5.0162	3.1109	28.309	Scaridae
2011	Calabas	1	rdp	Sparisoma aurofrenatum	23	t	-4.0781	2.7438	252.353	Scaridae
2011	Calabas	2	ocs	Acanthurus bahianus	15		-4.6005	2.9752	74.7837	Acanthuridae
2011	Calabas	2	ocs	Acanthurus bahianus	20		-4.6005	2.9752	176.005	Acanthuridae
2011	Calabas	2	ocs	Acanthurus bahianus	23		-4.6005	2.9752	266.755	Acanthuridae
2011	Calabas	2	blt	Acanthurus coeruleus	18		-2.8242	2.2638	191.111	Acanthuridae
2011	Calabas	2	blt	Acanthurus coeruleus	18		-2.8242	2.2638	191.111	Acanthuridae
2011	Calabas	2	blt	Acanthurus coeruleus	20		-2.8242	2.2638	242.589	Acanthuridae
2011	Calabas	2	prp	Scarus taeniopterus	19	i	-3.2257	2.3852	162.025	Scaridae
2011	Calabas	2	prp	Scarus taeniopterus	20	i	-3.2257	2.3852	183.112	Scaridae
2011	Calabas	2	prp	Scarus taeniopterus	20	i	-3.2257	2.3852	183.112	Scaridae
2011	Calabas	2	qup	Scarus vetula	23	i	-5.0162	3.1109	214.239	Scaridae
2011	Calabas	2	qup	Scarus vetula	31	i	-5.0162	3.1109	542.222	Scaridae
2011	Calabas	2	qup	Scarus vetula	38	t	-5.0162	3.1109	1021.52	Scaridae
2011	Calabas	2	rdp	Sparisoma aurofrenatum	22	i	-4.0781	2.7438	223.377	Scaridae
2011	Calabas	2	stop	Sparisoma viride	26	i	-4.4317	2.9051	383.742	Scaridae
2011	Calabas	2	stop	Sparisoma viride	33	i	-4.4317	2.9051	767.07	Scaridae
2011	Calabas	2	stop	Sparisoma viride	33	t	-4.4317	2.9051	767.07	Scaridae
2011	Calabas	3	blt	Acanthurus coeruleus	22		-2.8242	2.2638	301.007	Acanthuridae
2011	Calabas	3	strp	Scarus iseri	13	j	-4.8887	3.0548	37.0659	Scaridae
2011	Calabas	3	prp	Scarus taeniopterus	10	i	-3.2257	2.3852	35.051	Scaridae
2011	Calabas	3	prp	Scarus taeniopterus	22	i	-3.2257	2.3852	229.851	Scaridae
2011	Calabas	3	prp	Scarus taeniopterus	23	i	-3.2257	2.3852	255.56	Scaridae
2011	Calabas	3	prp	Scarus taeniopterus	13	j	-3.2257	2.3852	65.5357	Scaridae
2011	Calabas	3	prp	Scarus taeniopterus	15	j	-3.2257	2.3852	92.1962	Scaridae
2011	Calabas	3	prp	Scarus taeniopterus	20	j	-3.2257	2.3852	183.112	Scaridae
2011	Calabas	3	prp	Scarus taeniopterus	23	t	-3.2257	2.3852	255.56	Scaridae
2011	Calabas	3	qup	Scarus vetula	32	i	-5.0162	3.1109	598.51	Scaridae
2011	Calabas	3	rdp	Sparisoma aurofrenatum	22	i	-4.0781	2.7438	223.377	Scaridae
2011	Calabas	4	ocs	Acanthurus bahianus	19		-4.6005	2.9752	151.094	Acanthuridae
2011	Calabas	4	ocs	Acanthurus bahianus	20		-4.6005	2.9752	176.005	Acanthuridae
2011	Calabas	4	ocs	Acanthurus bahianus	20		-4.6005	2.9752	176.005	Acanthuridae
2011	Calabas	4	ocs	Acanthurus bahianus	20		-4.6005	2.9752	176.005	Acanthuridae
2011	Calabas	4	ocs	Acanthurus bahianus	21		-4.6005	2.9752	203.501	Acanthuridae
2011	Calabas	4	blt	Acanthurus coeruleus	23		-2.8242	2.2638	332.874	Acanthuridae
2011	Calabas	4	blt	Acanthurus coeruleus	23		-2.8242	2.2638	332.874	Acanthuridae
2011	Calabas	4	blt	Acanthurus coeruleus	23		-2.8242	2.2638	332.874	Acanthuridae
2011	Calabas	4	blt	Acanthurus coeruleus	23		-2.8242	2.2638	332.874	Acanthuridae
2011	Calabas	4	blt	Acanthurus coeruleus	23		-2.8242	2.2638	332.874	Acanthuridae
2011	Calabas	4	blt	Acanthurus coeruleus	23		-2.8242	2.2638	332.874	Acanthuridae
2011	Calabas	4	blt	Acanthurus coeruleus	23		-2.8242	2.2638	332.874	Acanthuridae
2011	Calabas	4	blt	Acanthurus coeruleus	23		-2.8242	2.2638	332.874	Acanthuridae
2011	Calabas	4	blt	Acanthurus coeruleus	23		-2.8242	2.2638	332.874	Acanthuridae
2011	Calabas	4	blt	Acanthurus coeruleus	23		-2.8242	2.2638	332.874	Acanthuridae
2011	Calabas	4	blt	Acanthurus coeruleus	23		-2.8242	2.2638	332.874	Acanthuridae
2011	Calabas	4	blt	Acanthurus coeruleus	23		-2.8242	2.2638	332.874	Acanthuridae
2011	Calabas	4	blt	Acanthurus coeruleus	23		-2.8242	2.2638	332.874	Acanthuridae
2011	Calabas	4	blt	Acanthurus coeruleus	23		-2.8242	2.2638	332.874	Acanthuridae
2011	Calabas	4	blt	Acanthurus coeruleus	23		-2.8242	2.2638	332.874	Acanthuridae
2011	Calabas	4	blt	Acanthurus coeruleus	23		-2.8242	2.2638	332.874	Acanthuridae
2011	Calabas	4	blt	Acanthurus coeruleus	23		-2.8242	2.2638	332.874	Acanthuridae
2011	Calabas	4	blt	Acanthurus coeruleus	23		-2.8242	2.2638	332.874	Acanthuridae
2011	Calabas	4	blt	Acanthurus coeruleus	23		-2.8242	2.2638	332.874	Acanthuridae
2011	Calabas	4	blt	Acanthurus coeruleus	23		-2.8242	2.2638	332.874	Acanthuridae
2011	Calabas	4	blt	Acanthurus coeruleus	23		-2.8242	2.2638	332.874	Acanthuridae
2011	Calabas	4	blt	Acanthurus coeruleus	23		-2.8242	2.2638	332.874	Acanthuridae
2011	Calabas	4	blt	Acanthurus coeruleus	23		-2.8242	2.2638	332.874	Acanthuridae
2011	Calabas	4	blt	Acanthurus coeruleus	23		-2.8242	2.2638	332.874	Acanthuridae
2011	Calabas	4	blt	Acanthurus coeruleus	23		-2.8242	2.2638	332.874	Acanthuridae
2011	Calabas	4	blt	Acanthurus coeruleus	23		-2.8242	2.2638	332.874	Acanthuridae
2011	Calabas	4	blt	Acanthurus coeruleus	23		-2.8242	2.2638	332.874	Acanthuridae
2011	Calabas	4	blt	Acanthurus coeruleus	23		-2.8242	2.2638	332.874	Acanthuridae
2011	Calabas	4	blt	Acanthurus coeruleus	23		-2.8242	2.2638	332.874	Acanthuridae
2011	Calabas	4	blt	Acanthurus coeruleus	23		-2.8242	2.2638	332.874	Acanthuridae
2011	Calabas	4	blt	Acanthurus coeruleus	23		-2.8242	2.2638	332.874	Acanthuridae
2011	Calabas	4	blt	Acanthurus coeruleus	23		-2.8242	2.2638	332.874	Acanthuridae
2011	Calabas	4	blt	Acanthurus coeruleus	23		-2.8242	2.2638	332.874	Acanthuridae
2011	Calabas	4	blt	Acanthurus coeruleus	23		-2.8242	2.2638	332.874	Acanthuridae
2011	Calabas	4	blt	Acanthurus coeruleus	23		-2.8242	2.2638	332.874	Acanthuridae
2011	Calabas	4	blt	Acanthurus coeruleus	23		-2.8242	2.2638	332.874	Acanthuridae
2011	Calabas	4	blt	Acanthurus coeruleus	23		-2.8242	2.2638	332.874	Acanthuridae
2011	Calabas	4	blt	Acanthurus coeruleus	23		-2.8242	2.2638	332.874	Acanthuridae
2011	Calabas	4	blt	Acanthurus coeruleus	23		-2.8242	2.2638	332.874	Acanthuridae
2011	Calabas	4	blt	Acanthurus coeruleus	23		-2.8242	2.2638	332.874	Acanthuridae
2011	Calabas	4	ytd	Microspathodon chrysurus	18		-4.7033	3.0825	177.246	Pomacentridae
2011	Calabas	4	strp	Scarus iseri	18	i	-4.8887	3.0548	100.163	Scaridae
2011	Calabas	4	prp	Scarus taeniopterus	15	i	-3.2257	2.3852	92.1962	Scaridae
2011	Calabas	4	prp	Scarus taeniopterus	18	i	-3.2257	2.3852	142.422	Scaridae
2011	Calabas	4	prp	Scarus taeniopterus	30	t	-3.2257	2.3852	481.648	Scaridae
2011	Calabas	4	qup	Scarus vetula	30	i	-5.0162	3.1109	489.64	Scaridae
2011	Calabas	4	qup	Scarus vetula	31	i	-5.0162	3.1109	542.222	Scaridae
2011	Calabas	4	qup	Scarus vetula	35	t	-5.0162	3.1109	790.936	Scaridae
2011	Calabas	4	qup	Scarus vetula	40	t	-5.0162	3.1109	1198.25	Scaridae
2011	Calabas	4	rdp	Sparisoma aurofrenatum	21	i	-4.0781	2.7438	196.61	Scaridae
2011	Calabas	5	dcf	Acanthurus chirurgus	25		-2.4262	2.0768	357.966	Acanthuridae
2011	Calabas	5	blt	Acanthurus coeruleus	24		-2.8242	2.2638	366.541	Acanthuridae
2011	Calabas	5	ytd	Microspathodon chrysurus	13		-4.7033	3.0825	65.0025	Pomacentridae
2011	Calabas	5	ytd	Microspathodon chrysurus	15		-4.7033	3.0825	101.042	Pomacentridae
2011	Calabas	5	prp	Scarus taeniopterus	22	i	-3.2257	2.3852	229.851	Scaridae
2011	Calabas	5	prp	Scarus taeniopterus	22	i	-3.2257	2.3852	229.851	Scaridae
2011	Calabas	5	prp	Scarus taeniopterus	22	i	-3.2257	2.3852	229.851	Scaridae
2011	Calabas	5	prp	Scarus taeniopterus	22	i	-3.2257	2.3852	229.851	Scaridae
2011	Calabas	5	prp	Scarus taeniopterus	22	i	-3.2257	2.3852	229.851	Scaridae
2011	Calabas	5	prp	Scarus taeniopterus	22	i	-3.2257	2.3852	229.851	Scaridae
2011	Calabas	5	prp	Scarus taeniopterus	22	i	-3.2257	2.3852	229.851	Scaridae
2011	Calabas	5	prp	Scarus taeniopterus	22	i	-3.2257	2.3852	229.851	Scaridae
2011	Calabas	5	prp	Scarus taeniopterus	22	i	-3.2257	2.3852	229.851	Scaridae
2011	Calabas	5	prp	Scarus taeniopterus	22	i	-3.2257	2.3852	229.851	Scaridae
2011	Calabas	5	prp	Scarus taeniopterus	22	i	-3.2257	2.3852	229.851	Scaridae
2011	Calabas	5	prp	Scarus taeniopterus	22	i	-3.2257	2.3852	229.851	Scaridae
2011	Calabas	5	prp	Scarus taeniopterus	22	i	-3.2257	2.3852	229.851	Scaridae
2011	Calabas	5	prp	Scarus taeniopterus	22	i	-3.2257	2.3852	229.851	Scaridae
2011	Calabas	5	prp	Scarus taeniopterus	22	i	-3.2257	2.3852	229.851	Scaridae
2011	Calabas	5	prp	Scarus taeniopterus	22	i	-3.2257	2.3852	229.851	Scaridae
2011	Calabas	5	prp	Scarus taeniopterus	22	i	-3.2257	2.3852	229.851	Scaridae
2011	Calabas	5	prp	Scarus taeniopterus	22	i	-3.2257	2.3852	229.851	Scaridae
2011	Calabas	5	prp	Scarus taeniopterus	22	i	-3.2257	2.3852	229.851	Scaridae
2011	Calabas	5	prp	Scarus taeniopterus	22	i	-3.2257	2.3852	229.851	Scaridae
2011	Calabas	5	prp	Scarus taeniopterus	22	i	-3.2257	2.3852	229.851	Scaridae
2011	Calabas	5	prp	Scarus taeniopterus	22	i	-3.2257	2.3852	229.851	Scaridae
2011	Calabas	5	prp	Scarus taeniopterus	22	i	-3.2257	2.3852	229.851	Scaridae
2011	Calabas	5	prp	Scarus taeniopterus	22	i	-3.2257	2.3852	229.851	Scaridae
2011	Calabas	5	prp	Scarus taeniopterus	22	i	-3.2257	2.3852	229.851	Scaridae
2011	Calabas	5	prp	Scarus taeniopterus	22	i	-3.2257	2.3852	229.851	Scaridae
2011	Calabas	5	prp	Scarus taeniopterus	22	i	-3.2257	2.3852	229.851	Scaridae
2011	Calabas	5	prp	Scarus taeniopterus	22	i	-3.2257	2.3852	229.851	Scaridae
2011	Calabas	5	prp	Scarus taeniopterus	22	i	-3.2257	2.3852	229.851	Scaridae
2011	Calabas	5	prp	Scarus taeniopterus	22	i	-3.2257	2.3852	229.851	Scaridae
2011	Calabas	5	prp	Scarus taeniopterus	22	t	-3.2257	2.3852	229.851	Scaridae
2011	Calabas	5	prp	Scarus taeniopterus	23	t	-3.2257	2.3852	255.56	Scaridae
2011	Calabas	5	prp	Scarus taeniopterus	28	t	-3.2257	2.3852	408.565	Scaridae
2011	Calabas	5	qup	Scarus vetula	30	i	-5.0162	3.1109	489.64	Scaridae
2011	Calabas	5	qup	Scarus vetula	30	i	-5.0162	3.1109	489.64	Scaridae
2011	Calabas	5	qup	Scarus vetula	35	t	-5.0162	3.1109	790.936	Scaridae
2011	Calabas	5	rdp	Sparisoma aurofrenatum	22	i	-4.0781	2.7438	223.377	Scaridae
2011	Calabas	5	stop	Sparisoma viride	31	i	-4.4317	2.9051	639.668	Scaridae
2011	Calabas	5	stop	Sparisoma viride	32	t	-4.4317	2.9051	701.473	Scaridae
2011	Calabas	6	blt	Acanthurus coeruleus	20		-2.8242	2.2638	242.589	Acanthuridae
2011	Calabas	6	blt	Acanthurus coeruleus	20		-2.8242	2.2638	242.589	Acanthuridae
2011	Calabas	6	blt	Acanthurus coeruleus	20		-2.8242	2.2638	242.589	Acanthuridae
2011	Calabas	6	blt	Acanthurus coeruleus	23		-2.8242	2.2638	332.874	Acanthuridae
2011	Calabas	6	prp	Scarus taeniopterus	20	i	-3.2257	2.3852	183.112	Scaridae
2011	Calabas	6	prp	Scarus taeniopterus	21	i	-3.2257	2.3852	205.711	Scaridae
2011	Calabas	6	prp	Scarus taeniopterus	22	i	-3.2257	2.3852	229.851	Scaridae
2011	Calabas	6	prp	Scarus taeniopterus	22	i	-3.2257	2.3852	229.851	Scaridae
2011	Calabas	6	prp	Scarus taeniopterus	22	i	-3.2257	2.3852	229.851	Scaridae
2011	Calabas	6	prp	Scarus taeniopterus	22	i	-3.2257	2.3852	229.851	Scaridae
2011	Calabas	6	prp	Scarus taeniopterus	23	i	-3.2257	2.3852	255.56	Scaridae
2011	Calabas	6	prp	Scarus taeniopterus	23	i	-3.2257	2.3852	255.56	Scaridae
2011	Calabas	6	prp	Scarus taeniopterus	23	i	-3.2257	2.3852	255.56	Scaridae
2011	Calabas	6	prp	Scarus taeniopterus	18	j	-3.2257	2.3852	142.422	Scaridae
2011	Calabas	6	prp	Scarus taeniopterus	19	j	-3.2257	2.3852	162.025	Scaridae
2011	Calabas	6	prp	Scarus taeniopterus	23	t	-3.2257	2.3852	255.56	Scaridae
2011	Calabas	6	prp	Scarus taeniopterus	24	t	-3.2257	2.3852	282.865	Scaridae
2011	Calabas	6	qup	Scarus vetula	38	t	-5.0162	3.1109	1021.52	Scaridae
2011	Calabas	6	rdp	Sparisoma aurofrenatum	20	i	-4.0781	2.7438	171.975	Scaridae
2011	Calabas	6	stop	Sparisoma viride	30	i	-4.4317	2.9051	581.547	Scaridae
2011	Calabas	6	stop	Sparisoma viride	33	t	-4.4317	2.9051	767.07	Scaridae
2011	Calabas	7	ocs	Acanthurus bahianus	15		-4.6005	2.9752	74.7837	Acanthuridae
2011	Calabas	7	blt	Acanthurus coeruleus	22		-2.8242	2.2638	301.007	Acanthuridae
2011	Calabas	7	blt	Acanthurus coeruleus	22		-2.8242	2.2638	301.007	Acanthuridae
2011	Calabas	7	prp	Scarus taeniopterus	20	i	-3.2257	2.3852	183.112	Scaridae
2011	Calabas	7	prp	Scarus taeniopterus	22	t	-3.2257	2.3852	229.851	Scaridae
2011	Calabas	7	prp	Scarus taeniopterus	23	t	-3.2257	2.3852	255.56	Scaridae
2011	Calabas	7	prp	Scarus taeniopterus	30	t	-3.2257	2.3852	481.648	Scaridae
2011	Calabas	7	stop	Sparisoma viride	28	i	-4.4317	2.9051	475.925	Scaridae
2011	Calabas	7	stop	Sparisoma viride	30	i	-4.4317	2.9051	581.547	Scaridae
2011	Calabas	7	stop	Sparisoma viride	30	i	-4.4317	2.9051	581.547	Scaridae
2011	Calabas	7	stop	Sparisoma viride	32	i	-4.4317	2.9051	701.473	Scaridae
2011	Calabas	7	stop	Sparisoma viride	32	i	-4.4317	2.9051	701.473	Scaridae
2011	Calabas	7	stop	Sparisoma viride	32	i	-4.4317	2.9051	701.473	Scaridae
2011	Calabas	7	stop	Sparisoma viride	33	t	-4.4317	2.9051	767.07	Scaridae
2011	Calabas	7	stop	Sparisoma viride	33	t	-4.4317	2.9051	767.07	Scaridae
2011	Calabas	8	ocs	Acanthurus bahianus	18		-4.6005	2.9752	128.643	Acanthuridae
2011	Calabas	8	blt	Acanthurus coeruleus	18		-2.8242	2.2638	191.111	Acanthuridae
2011	Calabas	8	blt	Acanthurus coeruleus	18		-2.8242	2.2638	191.111	Acanthuridae
2011	Calabas	8	prp	Scarus taeniopterus	18	i	-3.2257	2.3852	142.422	Scaridae
2011	Calabas	8	prp	Scarus taeniopterus	20	i	-3.2257	2.3852	183.112	Scaridae
2011	Calabas	8	prp	Scarus taeniopterus	20		-3.2257	2.3852	183.112	Scaridae
2011	Calabas	8	qup	Scarus vetula	33	i	-5.0162	3.1109	658.635	Scaridae
2011	Calabas	8	stop	Sparisoma viride	32	i	-4.4317	2.9051	701.473	Scaridae
2011	Calabas	8	stop	Sparisoma viride	32	i	-4.4317	2.9051	701.473	Scaridae
2011	Calabas	8	stop	Sparisoma viride	32	t	-4.4317	2.9051	701.473	Scaridae
2011	Eighteenth Palm	1	blt	Acanthurus coeruleus	18		-2.8242	2.2638	191.111	Acanthuridae
2011	Eighteenth Palm	1	qup	Scarus vetula	35	t	-5.0162	3.1109	790.936	Scaridae
2011	Eighteenth Palm	1	qup	Scarus vetula	35	t	-5.0162	3.1109	790.936	Scaridae
2011	Eighteenth Palm	1	stop	Sparisoma viride	28	i	-4.4317	2.9051	475.925	Scaridae
2011	Eighteenth Palm	1	stop	Sparisoma viride	32	i	-4.4317	2.9051	701.473	Scaridae
2011	Eighteenth Palm	2	ocs	Acanthurus bahianus	18		-4.6005	2.9752	128.643	Acanthuridae
2011	Eighteenth Palm	2	prp	Scarus taeniopterus	18	i	-3.2257	2.3852	142.422	Scaridae
2011	Eighteenth Palm	2	prp	Scarus taeniopterus	18	i	-3.2257	2.3852	142.422	Scaridae
2011	Eighteenth Palm	2	prp	Scarus taeniopterus	20	i	-3.2257	2.3852	183.112	Scaridae
2011	Eighteenth Palm	2	prp	Scarus taeniopterus	20	i	-3.2257	2.3852	183.112	Scaridae
2011	Eighteenth Palm	2	prp	Scarus taeniopterus	23	i	-3.2257	2.3852	255.56	Scaridae
2011	Eighteenth Palm	2	prp	Scarus taeniopterus	23	t	-3.2257	2.3852	255.56	Scaridae
2011	Eighteenth Palm	2	qup	Scarus vetula	34	t	-5.0162	3.1109	722.733	Scaridae
2011	Eighteenth Palm	2	rdp	Sparisoma aurofrenatum	23	t	-4.0781	2.7438	252.353	Scaridae
2011	Eighteenth Palm	2	stop	Sparisoma viride	14	i	-4.4317	2.9051	63.5355	Scaridae
2011	Eighteenth Palm	2	stop	Sparisoma viride	25	i	-4.4317	2.9051	342.417	Scaridae
2011	Eighteenth Palm	2	stop	Sparisoma viride	34	t	-4.4317	2.9051	836.564	Scaridae
2011	Eighteenth Palm	3	ocs	Acanthurus bahianus	16		-4.6005	2.9752	90.6145	Acanthuridae
2011	Eighteenth Palm	3	ocs	Acanthurus bahianus	17		-4.6005	2.9752	108.525	Acanthuridae
2011	Eighteenth Palm	3	blt	Acanthurus coeruleus	15		-2.8242	2.2638	126.484	Acanthuridae
2011	Eighteenth Palm	3	ytd	Microspathodon chrysurus	15		-4.7033	3.0825	101.042	Pomacentridae
2011	Eighteenth Palm	3	prp	Scarus taeniopterus	20	i	-3.2257	2.3852	183.112	Scaridae
2011	Eighteenth Palm	3	prp	Scarus taeniopterus	7	j	-3.2257	2.3852	14.9702	Scaridae
2011	Eighteenth Palm	3	prp	Scarus taeniopterus	12	j	-3.2257	2.3852	54.1456	Scaridae
2011	Eighteenth Palm	3	prp	Scarus taeniopterus	12	j	-3.2257	2.3852	54.1456	Scaridae
2011	Eighteenth Palm	3	prp	Scarus taeniopterus	12	j	-3.2257	2.3852	54.1456	Scaridae
2011	Eighteenth Palm	3	prp	Scarus taeniopterus	12	j	-3.2257	2.3852	54.1456	Scaridae
2011	Eighteenth Palm	3	prp	Scarus taeniopterus	13	j	-3.2257	2.3852	65.5357	Scaridae
2011	Eighteenth Palm	3	prp	Scarus taeniopterus	15	j	-3.2257	2.3852	92.1962	Scaridae
2011	Eighteenth Palm	3	prp	Scarus taeniopterus	23	t	-3.2257	2.3852	255.56	Scaridae
2011	Eighteenth Palm	3	qup	Scarus vetula	20	i	-5.0162	3.1109	138.699	Scaridae
2011	Eighteenth Palm	3	qup	Scarus vetula	28	i	-5.0162	3.1109	395.061	Scaridae
2011	Eighteenth Palm	3	stop	Sparisoma viride	27	i	-4.4317	2.9051	428.208	Scaridae
2011	Eighteenth Palm	3	stop	Sparisoma viride	32	i	-4.4317	2.9051	701.473	Scaridae
2011	Eighteenth Palm	4	ocs	Acanthurus bahianus	18		-4.6005	2.9752	128.643	Acanthuridae
2011	Eighteenth Palm	4	ytd	Microspathodon chrysurus	15		-4.7033	3.0825	101.042	Pomacentridae
2011	Eighteenth Palm	4	prp	Scarus taeniopterus	20	i	-3.2257	2.3852	183.112	Scaridae
2011	Eighteenth Palm	4	prp	Scarus taeniopterus	22	i	-3.2257	2.3852	229.851	Scaridae
2011	Eighteenth Palm	4	prp	Scarus taeniopterus	21	t	-3.2257	2.3852	205.711	Scaridae
2011	Eighteenth Palm	4	prp	Scarus taeniopterus	23	t	-3.2257	2.3852	255.56	Scaridae
2011	Eighteenth Palm	4	prp	Scarus taeniopterus	23	t	-3.2257	2.3852	255.56	Scaridae
2011	Eighteenth Palm	4	qup	Scarus vetula	30	i	-5.0162	3.1109	489.64	Scaridae
2011	Eighteenth Palm	4	stop	Sparisoma viride	30	i	-4.4317	2.9051	581.547	Scaridae
2011	Eighteenth Palm	4	stop	Sparisoma viride	32	t	-4.4317	2.9051	701.473	Scaridae
2011	Eighteenth Palm	4	stop	Sparisoma viride	32	t	-4.4317	2.9051	701.473	Scaridae
2011	Eighteenth Palm	5	prp	Scarus taeniopterus	22	i	-3.2257	2.3852	229.851	Scaridae
2011	Eighteenth Palm	5	prp	Scarus taeniopterus	10	j	-3.2257	2.3852	35.051	Scaridae
2011	Eighteenth Palm	5	prp	Scarus taeniopterus	10	j	-3.2257	2.3852	35.051	Scaridae
2011	Eighteenth Palm	5	prp	Scarus taeniopterus	10	j	-3.2257	2.3852	35.051	Scaridae
2011	Eighteenth Palm	5	prp	Scarus taeniopterus	10	j	-3.2257	2.3852	35.051	Scaridae
2011	Eighteenth Palm	5	prp	Scarus taeniopterus	10	j	-3.2257	2.3852	35.051	Scaridae
2011	Eighteenth Palm	5	prp	Scarus taeniopterus	12	j	-3.2257	2.3852	54.1456	Scaridae
2011	Eighteenth Palm	5	prp	Scarus taeniopterus	12	j	-3.2257	2.3852	54.1456	Scaridae
2011	Eighteenth Palm	5	prp	Scarus taeniopterus	12	j	-3.2257	2.3852	54.1456	Scaridae
2011	Eighteenth Palm	5	prp	Scarus taeniopterus	12	j	-3.2257	2.3852	54.1456	Scaridae
2011	Eighteenth Palm	5	prp	Scarus taeniopterus	12	j	-3.2257	2.3852	54.1456	Scaridae
2011	Eighteenth Palm	5	prp	Scarus taeniopterus	12	j	-3.2257	2.3852	54.1456	Scaridae
2011	Eighteenth Palm	5	prp	Scarus taeniopterus	12	j	-3.2257	2.3852	54.1456	Scaridae
2011	Eighteenth Palm	5	prp	Scarus taeniopterus	12	j	-3.2257	2.3852	54.1456	Scaridae
2011	Eighteenth Palm	5	prp	Scarus taeniopterus	23	t	-3.2257	2.3852	255.56	Scaridae
2011	Eighteenth Palm	5	prp	Scarus taeniopterus	24	t	-3.2257	2.3852	282.865	Scaridae
2011	Eighteenth Palm	5	prp	Scarus taeniopterus	33	t	-3.2257	2.3852	604.588	Scaridae
2011	Eighteenth Palm	5	qup	Scarus vetula	28	i	-5.0162	3.1109	395.061	Scaridae
2011	Eighteenth Palm	5	qup	Scarus vetula	34	t	-5.0162	3.1109	722.733	Scaridae
2011	Eighteenth Palm	5	qup	Scarus vetula	35	t	-5.0162	3.1109	790.936	Scaridae
2011	Eighteenth Palm	5	stop	Sparisoma viride	28	i	-4.4317	2.9051	475.925	Scaridae
2011	Eighteenth Palm	6	strp	Scarus iseri	20	t	-4.8887	3.0548	138.193	Scaridae
2011	Eighteenth Palm	6	prp	Scarus taeniopterus	20	i	-3.2257	2.3852	183.112	Scaridae
2011	Eighteenth Palm	6	qup	Scarus vetula	29	i	-5.0162	3.1109	440.63	Scaridae
2011	Eighteenth Palm	6	qup	Scarus vetula	32	i	-5.0162	3.1109	598.51	Scaridae
2011	Eighteenth Palm	6	qup	Scarus vetula	35	t	-5.0162	3.1109	790.936	Scaridae
2011	Eighteenth Palm	6	rdp	Sparisoma aurofrenatum	22	i	-4.0781	2.7438	223.377	Scaridae
2011	Eighteenth Palm	6	stop	Sparisoma viride	30	i	-4.4317	2.9051	581.547	Scaridae
2011	Eighteenth Palm	6	stop	Sparisoma viride	30	i	-4.4317	2.9051	581.547	Scaridae
2011	Eighteenth Palm	6	stop	Sparisoma viride	32	t	-4.4317	2.9051	701.473	Scaridae
2011	Eighteenth Palm	6	stop	Sparisoma viride	33	t	-4.4317	2.9051	767.07	Scaridae
2011	Eighteenth Palm	7	ocs	Acanthurus bahianus	18		-4.6005	2.9752	128.643	Acanthuridae
2011	Eighteenth Palm	7	blt	Acanthurus coeruleus	15		-2.8242	2.2638	126.484	Acanthuridae
2011	Eighteenth Palm	7	blt	Acanthurus coeruleus	17		-2.8242	2.2638	167.915	Acanthuridae
2011	Eighteenth Palm	7	blt	Acanthurus coeruleus	17		-2.8242	2.2638	167.915	Acanthuridae
2011	Eighteenth Palm	7	blt	Acanthurus coeruleus	17		-2.8242	2.2638	167.915	Acanthuridae
2011	Eighteenth Palm	7	blt	Acanthurus coeruleus	18		-2.8242	2.2638	191.111	Acanthuridae
2011	Eighteenth Palm	7	prp	Scarus taeniopterus	18	i	-3.2257	2.3852	142.422	Scaridae
2011	Eighteenth Palm	7	prp	Scarus taeniopterus	20	i	-3.2257	2.3852	183.112	Scaridae
2011	Eighteenth Palm	7	prp	Scarus taeniopterus	23	t	-3.2257	2.3852	255.56	Scaridae
2011	Eighteenth Palm	7	qup	Scarus vetula	28	i	-5.0162	3.1109	395.061	Scaridae
2011	Eighteenth Palm	7	qup	Scarus vetula	30	i	-5.0162	3.1109	489.64	Scaridae
2011	Eighteenth Palm	7	qup	Scarus vetula	30	i	-5.0162	3.1109	489.64	Scaridae
2011	Eighteenth Palm	7	stop	Sparisoma viride	32	t	-4.4317	2.9051	701.473	Scaridae
2011	Eighteenth Palm	8	strp	Scarus iseri	23	t	-4.8887	3.0548	211.79	Scaridae
2011	Eighteenth Palm	8	prp	Scarus taeniopterus	17	i	-3.2257	2.3852	124.27	Scaridae
2011	Eighteenth Palm	8	prp	Scarus taeniopterus	18	i	-3.2257	2.3852	142.422	Scaridae
2011	Eighteenth Palm	8	prp	Scarus taeniopterus	19	i	-3.2257	2.3852	162.025	Scaridae
2011	Eighteenth Palm	8	prp	Scarus taeniopterus	20	i	-3.2257	2.3852	183.112	Scaridae
2011	Eighteenth Palm	8	prp	Scarus taeniopterus	10	j	-3.2257	2.3852	35.051	Scaridae
2011	Eighteenth Palm	8	prp	Scarus taeniopterus	10	j	-3.2257	2.3852	35.051	Scaridae
2011	Eighteenth Palm	8	prp	Scarus taeniopterus	10	j	-3.2257	2.3852	35.051	Scaridae
2011	Eighteenth Palm	8	prp	Scarus taeniopterus	10	j	-3.2257	2.3852	35.051	Scaridae
2011	Eighteenth Palm	8	prp	Scarus taeniopterus	10	j	-3.2257	2.3852	35.051	Scaridae
2011	Eighteenth Palm	8	prp	Scarus taeniopterus	10	j	-3.2257	2.3852	35.051	Scaridae
2011	Eighteenth Palm	8	prp	Scarus taeniopterus	10	j	-3.2257	2.3852	35.051	Scaridae
2011	Eighteenth Palm	8	prp	Scarus taeniopterus	10	j	-3.2257	2.3852	35.051	Scaridae
2011	Eighteenth Palm	8	prp	Scarus taeniopterus	23	t	-3.2257	2.3852	255.56	Scaridae
2011	Eighteenth Palm	8	qup	Scarus vetula	25	i	-5.0162	3.1109	277.684	Scaridae
2011	Eighteenth Palm	8	rdp	Sparisoma aurofrenatum	20	i	-4.0781	2.7438	171.975	Scaridae
2011	Eighteenth Palm	8	rdp	Sparisoma aurofrenatum	23	i	-4.0781	2.7438	252.353	Scaridae
2011	Eighteenth Palm	8	rtp	Sparisoma chrysopterum	35	t	-3.0509	2.3192	706.81	Scaridae
2011	Eighteenth Palm	8	stop	Sparisoma viride	28	i	-4.4317	2.9051	475.925	Scaridae
2011	Eighteenth Palm	8	stop	Sparisoma viride	30	i	-4.4317	2.9051	581.547	Scaridae
2011	Eighteenth Palm	8	stop	Sparisoma viride	35	t	-4.4317	2.9051	910.064	Scaridae
2011	Forest	1	blt	Acanthurus coeruleus	15		-2.8242	2.2638	126.484	Acanthuridae
2011	Forest	1	blt	Acanthurus coeruleus	18		-2.8242	2.2638	191.111	Acanthuridae
2011	Forest	1	blt	Acanthurus coeruleus	18		-2.8242	2.2638	191.111	Acanthuridae
2011	Forest	1	prp	Scarus taeniopterus	10	i	-3.2257	2.3852	35.051	Scaridae
2011	Forest	1	prp	Scarus taeniopterus	10	i	-3.2257	2.3852	35.051	Scaridae
2011	Forest	1	prp	Scarus taeniopterus	11	i	-3.2257	2.3852	43.9977	Scaridae
2011	Forest	1	prp	Scarus taeniopterus	12	i	-3.2257	2.3852	54.1456	Scaridae
2011	Forest	1	prp	Scarus taeniopterus	12	i	-3.2257	2.3852	54.1456	Scaridae
2011	Forest	1	prp	Scarus taeniopterus	15	i	-3.2257	2.3852	92.1962	Scaridae
2011	Forest	1	prp	Scarus taeniopterus	15	i	-3.2257	2.3852	92.1962	Scaridae
2011	Forest	1	prp	Scarus taeniopterus	18	i	-3.2257	2.3852	142.422	Scaridae
2011	Forest	1	prp	Scarus taeniopterus	5	j	-3.2257	2.3852	6.70939	Scaridae
2011	Forest	1	prp	Scarus taeniopterus	23	t	-3.2257	2.3852	255.56	Scaridae
2011	Forest	1	prp	Scarus taeniopterus	23	t	-3.2257	2.3852	255.56	Scaridae
2011	Forest	1	rdp	Sparisoma aurofrenatum	20	i	-4.0781	2.7438	171.975	Scaridae
2011	Forest	1	stop	Sparisoma viride	25	i	-4.4317	2.9051	342.417	Scaridae
2011	Forest	1	stop	Sparisoma viride	28	i	-4.4317	2.9051	475.925	Scaridae
2011	Forest	1	stop	Sparisoma viride	12	j	-4.4317	2.9051	40.6003	Scaridae
2011	Forest	1	stop	Sparisoma viride	32	t	-4.4317	2.9051	701.473	Scaridae
2011	Forest	2	ytd	Microspathodon chrysurus	18		-4.7033	3.0825	177.246	Pomacentridae
2011	Forest	2	prp	Scarus taeniopterus	20	i	-3.2257	2.3852	183.112	Scaridae
2011	Forest	2	prp	Scarus taeniopterus	20	i	-3.2257	2.3852	183.112	Scaridae
2011	Forest	2	prp	Scarus taeniopterus	20	i	-3.2257	2.3852	183.112	Scaridae
2011	Forest	2	prp	Scarus taeniopterus	22	i	-3.2257	2.3852	229.851	Scaridae
2011	Forest	2	prp	Scarus taeniopterus	10	j	-3.2257	2.3852	35.051	Scaridae
2011	Forest	2	prp	Scarus taeniopterus	17	j	-3.2257	2.3852	124.27	Scaridae
2011	Forest	2	qup	Scarus vetula	30	i	-5.0162	3.1109	489.64	Scaridae
2011	Forest	2	qup	Scarus vetula	34	t	-5.0162	3.1109	722.733	Scaridae
2011	Forest	2	rdp	Sparisoma aurofrenatum	17	i	-4.0781	2.7438	110.105	Scaridae
2011	Forest	2	rdp	Sparisoma aurofrenatum	17	i	-4.0781	2.7438	110.105	Scaridae
2011	Forest	2	rdp	Sparisoma aurofrenatum	18	i	-4.0781	2.7438	128.8	Scaridae
2011	Forest	2	rdp	Sparisoma aurofrenatum	20	i	-4.0781	2.7438	171.975	Scaridae
2011	Forest	2	rdp	Sparisoma aurofrenatum	20	i	-4.0781	2.7438	171.975	Scaridae
2011	Forest	2	rdp	Sparisoma aurofrenatum	23	t	-4.0781	2.7438	252.353	Scaridae
2011	Forest	2	stop	Sparisoma viride	27	i	-4.4317	2.9051	428.208	Scaridae
2011	Forest	2	stop	Sparisoma viride	27	i	-4.4317	2.9051	428.208	Scaridae
2011	Forest	2	stop	Sparisoma viride	28	i	-4.4317	2.9051	475.925	Scaridae
2011	Forest	2	stop	Sparisoma viride	30	i	-4.4317	2.9051	581.547	Scaridae
2011	Forest	3	blt	Acanthurus coeruleus	17		-2.8242	2.2638	167.915	Acanthuridae
2011	Forest	3	blt	Acanthurus coeruleus	18		-2.8242	2.2638	191.111	Acanthuridae
2011	Forest	3	blt	Acanthurus coeruleus	18		-2.8242	2.2638	191.111	Acanthuridae
2011	Forest	3	prp	Scarus taeniopterus	20	i	-3.2257	2.3852	183.112	Scaridae
2011	Forest	3	prp	Scarus taeniopterus	5	j	-3.2257	2.3852	6.70939	Scaridae
2011	Forest	3	prp	Scarus taeniopterus	23	t	-3.2257	2.3852	255.56	Scaridae
2011	Forest	3	prp	Scarus taeniopterus	23	t	-3.2257	2.3852	255.56	Scaridae
2011	Forest	3	qup	Scarus vetula	25	i	-5.0162	3.1109	277.684	Scaridae
2011	Forest	3	qup	Scarus vetula	28	i	-5.0162	3.1109	395.061	Scaridae
2011	Forest	3	rdp	Sparisoma aurofrenatum	22	i	-4.0781	2.7438	223.377	Scaridae
2011	Forest	3	stop	Sparisoma viride	13	i	-4.4317	2.9051	51.2291	Scaridae
2011	Forest	3	stop	Sparisoma viride	20	i	-4.4317	2.9051	179.07	Scaridae
2011	Forest	3	stop	Sparisoma viride	23	i	-4.4317	2.9051	268.754	Scaridae
2011	Forest	3	stop	Sparisoma viride	30	i	-4.4317	2.9051	581.547	Scaridae
2011	Forest	3	stop	Sparisoma viride	30	i	-4.4317	2.9051	581.547	Scaridae
2011	Forest	3	stop	Sparisoma viride	30	i	-4.4317	2.9051	581.547	Scaridae
2011	Forest	3	stop	Sparisoma viride	31	t	-4.4317	2.9051	639.668	Scaridae
2011	Forest	3	stop	Sparisoma viride	32	t	-4.4317	2.9051	701.473	Scaridae
2011	Forest	4	ytd	Microspathodon chrysurus	18		-4.7033	3.0825	177.246	Pomacentridae
2011	Forest	4	prp	Scarus taeniopterus	17	i	-3.2257	2.3852	124.27	Scaridae
2011	Forest	4	prp	Scarus taeniopterus	19	i	-3.2257	2.3852	162.025	Scaridae
2011	Forest	4	prp	Scarus taeniopterus	20	i	-3.2257	2.3852	183.112	Scaridae
2011	Forest	4	prp	Scarus taeniopterus	22	i	-3.2257	2.3852	229.851	Scaridae
2011	Forest	4	prp	Scarus taeniopterus	23	t	-3.2257	2.3852	255.56	Scaridae
2011	Forest	4	qup	Scarus vetula	26	i	-5.0162	3.1109	313.719	Scaridae
2011	Forest	5	prp	Scarus taeniopterus	18	i	-3.2257	2.3852	142.422	Scaridae
2011	Forest	5	prp	Scarus taeniopterus	19	i	-3.2257	2.3852	162.025	Scaridae
2011	Forest	5	prp	Scarus taeniopterus	20	i	-3.2257	2.3852	183.112	Scaridae
2011	Forest	5	prp	Scarus taeniopterus	20	i	-3.2257	2.3852	183.112	Scaridae
2011	Forest	5	prp	Scarus taeniopterus	21	i	-3.2257	2.3852	205.711	Scaridae
2011	Forest	5	prp	Scarus taeniopterus	8	j	-3.2257	2.3852	20.585	Scaridae
2011	Forest	5	prp	Scarus taeniopterus	9	j	-3.2257	2.3852	27.2621	Scaridae
2011	Forest	5	prp	Scarus taeniopterus	10	j	-3.2257	2.3852	35.051	Scaridae
2011	Forest	5	prp	Scarus taeniopterus	12	j	-3.2257	2.3852	54.1456	Scaridae
2011	Forest	5	prp	Scarus taeniopterus	18	j	-3.2257	2.3852	142.422	Scaridae
2011	Forest	5	prp	Scarus taeniopterus	23	t	-3.2257	2.3852	255.56	Scaridae
2011	Forest	5	stop	Sparisoma viride	28	i	-4.4317	2.9051	475.925	Scaridae
2011	Forest	5	stop	Sparisoma viride	28	i	-4.4317	2.9051	475.925	Scaridae
2011	Forest	5	stop	Sparisoma viride	30	i	-4.4317	2.9051	581.547	Scaridae
2011	Forest	6	blt	Acanthurus coeruleus	18		-2.8242	2.2638	191.111	Acanthuridae
2011	Forest	6	prp	Scarus taeniopterus	17	i	-3.2257	2.3852	124.27	Scaridae
2011	Forest	6	prp	Scarus taeniopterus	21	i	-3.2257	2.3852	205.711	Scaridae
2011	Forest	6	prp	Scarus taeniopterus	22	i	-3.2257	2.3852	229.851	Scaridae
2011	Forest	6	prp	Scarus taeniopterus	23	i	-3.2257	2.3852	255.56	Scaridae
2011	Forest	6	prp	Scarus taeniopterus	23	t	-3.2257	2.3852	255.56	Scaridae
2011	Forest	6	qup	Scarus vetula	35	t	-5.0162	3.1109	790.936	Scaridae
2011	Forest	6	rdp	Sparisoma aurofrenatum	13	i	-4.0781	2.7438	52.7397	Scaridae
2011	Forest	6	rdp	Sparisoma aurofrenatum	22	i	-4.0781	2.7438	223.377	Scaridae
2011	Forest	6	rdp	Sparisoma aurofrenatum	20	t	-4.0781	2.7438	171.975	Scaridae
2011	Forest	6	stop	Sparisoma viride	13	i	-4.4317	2.9051	51.2291	Scaridae
2011	Forest	6	stop	Sparisoma viride	20	i	-4.4317	2.9051	179.07	Scaridae
2011	Forest	6	stop	Sparisoma viride	25	i	-4.4317	2.9051	342.417	Scaridae
2011	Forest	6	stop	Sparisoma viride	28	i	-4.4317	2.9051	475.925	Scaridae
2011	Forest	6	stop	Sparisoma viride	30	i	-4.4317	2.9051	581.547	Scaridae
2011	Forest	6	stop	Sparisoma viride	32	t	-4.4317	2.9051	701.473	Scaridae
2011	Forest	6	stop	Sparisoma viride	32	t	-4.4317	2.9051	701.473	Scaridae
2011	Forest	6	stop	Sparisoma viride	32	t	-4.4317	2.9051	701.473	Scaridae
2011	Forest	6	ytp	Sparisoma rubripinne	28	t	-4.8701	3.0641	424.851	Scaridae
2011	Forest	7	blt	Acanthurus coeruleus	18		-2.8242	2.2638	191.111	Acanthuridae
2011	Forest	7	ytd	Microspathodon chrysurus	12		-4.7033	3.0825	50.7898	Pomacentridae
2011	Forest	7	strp	Scarus iseri	10	i	-4.8887	3.0548	16.6303	Scaridae
2011	Forest	7	prp	Scarus taeniopterus	20	i	-3.2257	2.3852	183.112	Scaridae
2011	Forest	7	prp	Scarus taeniopterus	23	i	-3.2257	2.3852	255.56	Scaridae
2011	Forest	7	prp	Scarus taeniopterus	10	j	-3.2257	2.3852	35.051	Scaridae
2011	Forest	7	prp	Scarus taeniopterus	12	j	-3.2257	2.3852	54.1456	Scaridae
2011	Forest	7	rdp	Sparisoma aurofrenatum	23	t	-4.0781	2.7438	252.353	Scaridae
2011	Forest	7	stop	Sparisoma viride	23	i	-4.4317	2.9051	268.754	Scaridae
2011	Forest	7	stop	Sparisoma viride	32	i	-4.4317	2.9051	701.473	Scaridae
2011	Forest	7	stop	Sparisoma viride	32	i	-4.4317	2.9051	701.473	Scaridae
2011	Forest	7	stop	Sparisoma viride	32	t	-4.4317	2.9051	701.473	Scaridae
2011	Forest	7	stop	Sparisoma viride	32	t	-4.4317	2.9051	701.473	Scaridae
2011	Forest	8	prp	Scarus taeniopterus	17	i	-3.2257	2.3852	124.27	Scaridae
2011	Forest	8	prp	Scarus taeniopterus	18	i	-3.2257	2.3852	142.422	Scaridae
2011	Forest	8	prp	Scarus taeniopterus	19	i	-3.2257	2.3852	162.025	Scaridae
2011	Forest	8	prp	Scarus taeniopterus	15	t	-3.2257	2.3852	92.1962	Scaridae
2011	Forest	8	prp	Scarus taeniopterus	23	t	-3.2257	2.3852	255.56	Scaridae
2011	Forest	8	prp	Scarus taeniopterus	23	t	-3.2257	2.3852	255.56	Scaridae
2011	Forest	8	prp	Scarus taeniopterus	23	t	-3.2257	2.3852	255.56	Scaridae
2011	Forest	8	qup	Scarus vetula	28	i	-5.0162	3.1109	395.061	Scaridae
2011	Forest	8	rdp	Sparisoma aurofrenatum	20	t	-4.0781	2.7438	171.975	Scaridae
2011	Forest	8	stop	Sparisoma viride	28	i	-4.4317	2.9051	475.925	Scaridae
2011	Front Porch	1	ocs	Acanthurus bahianus	23		-4.6005	2.9752	266.755	Acanthuridae
2011	Front Porch	1	blt	Acanthurus coeruleus	20		-2.8242	2.2638	242.589	Acanthuridae
2011	Front Porch	1	prp	Scarus taeniopterus	15	j	-3.2257	2.3852	92.1962	Scaridae
2011	Front Porch	1	prp	Scarus taeniopterus	30	t	-3.2257	2.3852	481.648	Scaridae
2011	Front Porch	1	rdp	Sparisoma aurofrenatum	35	t	-4.0781	2.7438	798.572	Scaridae
2011	Front Porch	1	stop	Sparisoma viride	23	i	-4.4317	2.9051	268.754	Scaridae
2011	Front Porch	1	stop	Sparisoma viride	23	i	-4.4317	2.9051	268.754	Scaridae
2011	Front Porch	1	stop	Sparisoma viride	23	i	-4.4317	2.9051	268.754	Scaridae
2011	Front Porch	1	stop	Sparisoma viride	23	i	-4.4317	2.9051	268.754	Scaridae
2011	Front Porch	1	stop	Sparisoma viride	30	i	-4.4317	2.9051	581.547	Scaridae
2011	Front Porch	1	stop	Sparisoma viride	30	i	-4.4317	2.9051	581.547	Scaridae
2011	Front Porch	1	stop	Sparisoma viride	30	i	-4.4317	2.9051	581.547	Scaridae
2011	Front Porch	1	stop	Sparisoma viride	30	i	-4.4317	2.9051	581.547	Scaridae
2011	Front Porch	1	stop	Sparisoma viride	30	i	-4.4317	2.9051	581.547	Scaridae
2011	Front Porch	1	stop	Sparisoma viride	30	i	-4.4317	2.9051	581.547	Scaridae
2011	Front Porch	1	stop	Sparisoma viride	30	i	-4.4317	2.9051	581.547	Scaridae
2011	Front Porch	1	stop	Sparisoma viride	31	i	-4.4317	2.9051	639.668	Scaridae
2011	Front Porch	1	stop	Sparisoma viride	31	i	-4.4317	2.9051	639.668	Scaridae
2011	Front Porch	1	stop	Sparisoma viride	31	i	-4.4317	2.9051	639.668	Scaridae
2011	Front Porch	1	stop	Sparisoma viride	31	i	-4.4317	2.9051	639.668	Scaridae
2011	Front Porch	1	stop	Sparisoma viride	31	i	-4.4317	2.9051	639.668	Scaridae
2011	Front Porch	1	stop	Sparisoma viride	31	i	-4.4317	2.9051	639.668	Scaridae
2011	Front Porch	1	stop	Sparisoma viride	32	i	-4.4317	2.9051	701.473	Scaridae
2011	Front Porch	1	stop	Sparisoma viride	31	t	-4.4317	2.9051	639.668	Scaridae
2011	Front Porch	1	stop	Sparisoma viride	32	t	-4.4317	2.9051	701.473	Scaridae
2011	Front Porch	2	ocs	Acanthurus bahianus	20		-4.6005	2.9752	176.005	Acanthuridae
2011	Front Porch	2	ocs	Acanthurus bahianus	21		-4.6005	2.9752	203.501	Acanthuridae
2011	Front Porch	2	blt	Acanthurus coeruleus	21		-2.8242	2.2638	270.919	Acanthuridae
2011	Front Porch	2	ytd	Microspathodon chrysurus	10		-4.7033	3.0825	28.9534	Pomacentridae
2011	Front Porch	2	prp	Scarus taeniopterus	28	t	-3.2257	2.3852	408.565	Scaridae
2011	Front Porch	2	qup	Scarus vetula	35	t	-5.0162	3.1109	790.936	Scaridae
2011	Front Porch	2	stop	Sparisoma viride	20	i	-4.4317	2.9051	179.07	Scaridae
2011	Front Porch	2	stop	Sparisoma viride	22	i	-4.4317	2.9051	236.196	Scaridae
2011	Front Porch	2	stop	Sparisoma viride	25	i	-4.4317	2.9051	342.417	Scaridae
2011	Front Porch	2	stop	Sparisoma viride	26	i	-4.4317	2.9051	383.742	Scaridae
2011	Front Porch	2	stop	Sparisoma viride	27	i	-4.4317	2.9051	428.208	Scaridae
2011	Front Porch	2	stop	Sparisoma viride	28	i	-4.4317	2.9051	475.925	Scaridae
2011	Front Porch	2	stop	Sparisoma viride	29	i	-4.4317	2.9051	527.002	Scaridae
2011	Front Porch	2	stop	Sparisoma viride	29	i	-4.4317	2.9051	527.002	Scaridae
2011	Front Porch	2	stop	Sparisoma viride	30	i	-4.4317	2.9051	581.547	Scaridae
2011	Front Porch	2	stop	Sparisoma viride	30	i	-4.4317	2.9051	581.547	Scaridae
2011	Front Porch	2	stop	Sparisoma viride	30	i	-4.4317	2.9051	581.547	Scaridae
2011	Front Porch	2	stop	Sparisoma viride	30	i	-4.4317	2.9051	581.547	Scaridae
2011	Front Porch	2	stop	Sparisoma viride	30	i	-4.4317	2.9051	581.547	Scaridae
2011	Front Porch	2	stop	Sparisoma viride	30	i	-4.4317	2.9051	581.547	Scaridae
2011	Front Porch	2	stop	Sparisoma viride	30	i	-4.4317	2.9051	581.547	Scaridae
2011	Front Porch	2	stop	Sparisoma viride	30	i	-4.4317	2.9051	581.547	Scaridae
2011	Front Porch	2	stop	Sparisoma viride	30	i	-4.4317	2.9051	581.547	Scaridae
2011	Front Porch	2	stop	Sparisoma viride	31	i	-4.4317	2.9051	639.668	Scaridae
2011	Front Porch	2	stop	Sparisoma viride	32	i	-4.4317	2.9051	701.473	Scaridae
2011	Front Porch	2	stop	Sparisoma viride	32	i	-4.4317	2.9051	701.473	Scaridae
2011	Front Porch	2	stop	Sparisoma viride	32	i	-4.4317	2.9051	701.473	Scaridae
2011	Front Porch	2	stop	Sparisoma viride	32	i	-4.4317	2.9051	701.473	Scaridae
2011	Front Porch	2	stop	Sparisoma viride	32	i	-4.4317	2.9051	701.473	Scaridae
2011	Front Porch	2	stop	Sparisoma viride	32	i	-4.4317	2.9051	701.473	Scaridae
2011	Front Porch	2	ytp	Sparisoma rubripinne	32	t	-4.8701	3.0641	639.632	Scaridae
2011	Front Porch	3	ocs	Acanthurus bahianus	18		-4.6005	2.9752	128.643	Acanthuridae
2011	Front Porch	3	ocs	Acanthurus bahianus	18		-4.6005	2.9752	128.643	Acanthuridae
2011	Front Porch	3	strp	Scarus iseri	32	t	-4.8887	3.0548	580.807	Scaridae
2011	Front Porch	3	prp	Scarus taeniopterus	20	i	-3.2257	2.3852	183.112	Scaridae
2011	Front Porch	3	prp	Scarus taeniopterus	13	j	-3.2257	2.3852	65.5357	Scaridae
2011	Front Porch	3	prp	Scarus taeniopterus	19	j	-3.2257	2.3852	162.025	Scaridae
2011	Front Porch	3	prp	Scarus taeniopterus	23	t	-3.2257	2.3852	255.56	Scaridae
2011	Front Porch	3	qup	Scarus vetula	30	i	-5.0162	3.1109	489.64	Scaridae
2011	Front Porch	3	rdp	Sparisoma aurofrenatum	18	i	-4.0781	2.7438	128.8	Scaridae
2011	Front Porch	3	stop	Sparisoma viride	22	i	-4.4317	2.9051	236.196	Scaridae
2011	Front Porch	3	stop	Sparisoma viride	24	i	-4.4317	2.9051	304.125	Scaridae
2011	Front Porch	3	stop	Sparisoma viride	25	i	-4.4317	2.9051	342.417	Scaridae
2011	Front Porch	3	stop	Sparisoma viride	27	i	-4.4317	2.9051	428.208	Scaridae
2011	Front Porch	3	stop	Sparisoma viride	28	i	-4.4317	2.9051	475.925	Scaridae
2011	Front Porch	3	stop	Sparisoma viride	28	i	-4.4317	2.9051	475.925	Scaridae
2011	Front Porch	3	stop	Sparisoma viride	28	i	-4.4317	2.9051	475.925	Scaridae
2011	Front Porch	3	stop	Sparisoma viride	30	i	-4.4317	2.9051	581.547	Scaridae
2011	Front Porch	3	stop	Sparisoma viride	30	i	-4.4317	2.9051	581.547	Scaridae
2011	Front Porch	3	stop	Sparisoma viride	30	i	-4.4317	2.9051	581.547	Scaridae
2011	Front Porch	3	stop	Sparisoma viride	30	i	-4.4317	2.9051	581.547	Scaridae
2011	Front Porch	3	stop	Sparisoma viride	30	i	-4.4317	2.9051	581.547	Scaridae
2011	Front Porch	3	stop	Sparisoma viride	30	i	-4.4317	2.9051	581.547	Scaridae
2011	Front Porch	3	stop	Sparisoma viride	30	i	-4.4317	2.9051	581.547	Scaridae
2011	Front Porch	3	stop	Sparisoma viride	30	i	-4.4317	2.9051	581.547	Scaridae
2011	Front Porch	3	stop	Sparisoma viride	30	i	-4.4317	2.9051	581.547	Scaridae
2011	Front Porch	3	stop	Sparisoma viride	30	i	-4.4317	2.9051	581.547	Scaridae
2011	Front Porch	3	stop	Sparisoma viride	31	i	-4.4317	2.9051	639.668	Scaridae
2011	Front Porch	3	stop	Sparisoma viride	32	i	-4.4317	2.9051	701.473	Scaridae
2011	Front Porch	3	stop	Sparisoma viride	32	i	-4.4317	2.9051	701.473	Scaridae
2011	Front Porch	3	stop	Sparisoma viride	32	i	-4.4317	2.9051	701.473	Scaridae
2011	Front Porch	3	stop	Sparisoma viride	35	i	-4.4317	2.9051	910.064	Scaridae
2011	Front Porch	4	ocs	Acanthurus bahianus	25		-4.6005	2.9752	341.862	Acanthuridae
2011	Front Porch	4	prp	Scarus taeniopterus	7	j	-3.2257	2.3852	14.9702	Scaridae
2011	Front Porch	4	prp	Scarus taeniopterus	11	j	-3.2257	2.3852	43.9977	Scaridae
2011	Front Porch	4	prp	Scarus taeniopterus	25	t	-3.2257	2.3852	311.793	Scaridae
2011	Front Porch	4	prp	Scarus taeniopterus	25	t	-3.2257	2.3852	311.793	Scaridae
2011	Front Porch	4	qup	Scarus vetula	33	i	-5.0162	3.1109	658.635	Scaridae
2011	Front Porch	4	qup	Scarus vetula	35	t	-5.0162	3.1109	790.936	Scaridae
2011	Front Porch	4	qup	Scarus vetula	38	t	-5.0162	3.1109	1021.52	Scaridae
2011	Front Porch	4	stop	Sparisoma viride	25	i	-4.4317	2.9051	342.417	Scaridae
2011	Front Porch	4	stop	Sparisoma viride	27	i	-4.4317	2.9051	428.208	Scaridae
2011	Front Porch	4	stop	Sparisoma viride	27	i	-4.4317	2.9051	428.208	Scaridae
2011	Front Porch	4	stop	Sparisoma viride	27	i	-4.4317	2.9051	428.208	Scaridae
2011	Front Porch	4	stop	Sparisoma viride	27	i	-4.4317	2.9051	428.208	Scaridae
2011	Front Porch	4	stop	Sparisoma viride	30	i	-4.4317	2.9051	581.547	Scaridae
2011	Front Porch	4	stop	Sparisoma viride	30	i	-4.4317	2.9051	581.547	Scaridae
2011	Front Porch	4	stop	Sparisoma viride	30	i	-4.4317	2.9051	581.547	Scaridae
2011	Front Porch	4	stop	Sparisoma viride	31	i	-4.4317	2.9051	639.668	Scaridae
2011	Front Porch	4	stop	Sparisoma viride	32	i	-4.4317	2.9051	701.473	Scaridae
2011	Front Porch	4	stop	Sparisoma viride	32	i	-4.4317	2.9051	701.473	Scaridae
2011	Front Porch	4	stop	Sparisoma viride	32	i	-4.4317	2.9051	701.473	Scaridae
2011	Front Porch	4	stop	Sparisoma viride	32	i	-4.4317	2.9051	701.473	Scaridae
2011	Front Porch	4	stop	Sparisoma viride	33	t	-4.4317	2.9051	767.07	Scaridae
2011	Front Porch	4	ytp	Sparisoma rubripinne	20	i	-4.8701	3.0641	151.526	Scaridae
2011	Front Porch	5	dcf	Acanthurus chirurgus	20		-2.4262	2.0768	225.206	Acanthuridae
2011	Front Porch	5	blt	Acanthurus coeruleus	18		-2.8242	2.2638	191.111	Acanthuridae
2011	Front Porch	5	blt	Acanthurus coeruleus	20		-2.8242	2.2638	242.589	Acanthuridae
2011	Front Porch	5	prp	Scarus taeniopterus	25	t	-3.2257	2.3852	311.793	Scaridae
2011	Front Porch	5	prp	Scarus taeniopterus	28	t	-3.2257	2.3852	408.565	Scaridae
2011	Front Porch	5	qup	Scarus vetula	32	i	-5.0162	3.1109	598.51	Scaridae
2011	Front Porch	5	rdp	Sparisoma aurofrenatum	18	i	-4.0781	2.7438	128.8	Scaridae
2011	Front Porch	5	stop	Sparisoma viride	15	i	-4.4317	2.9051	77.6359	Scaridae
2011	Front Porch	5	stop	Sparisoma viride	19	i	-4.4317	2.9051	154.279	Scaridae
2011	Front Porch	5	stop	Sparisoma viride	21	i	-4.4317	2.9051	206.338	Scaridae
2011	Front Porch	5	stop	Sparisoma viride	22	i	-4.4317	2.9051	236.196	Scaridae
2011	Front Porch	5	stop	Sparisoma viride	22	i	-4.4317	2.9051	236.196	Scaridae
2011	Front Porch	5	stop	Sparisoma viride	22	i	-4.4317	2.9051	236.196	Scaridae
2011	Front Porch	5	stop	Sparisoma viride	22	i	-4.4317	2.9051	236.196	Scaridae
2011	Front Porch	5	stop	Sparisoma viride	23	i	-4.4317	2.9051	268.754	Scaridae
2011	Front Porch	5	stop	Sparisoma viride	25	i	-4.4317	2.9051	342.417	Scaridae
2011	Front Porch	5	stop	Sparisoma viride	25	i	-4.4317	2.9051	342.417	Scaridae
2011	Front Porch	5	stop	Sparisoma viride	26	i	-4.4317	2.9051	383.742	Scaridae
2011	Front Porch	5	stop	Sparisoma viride	30	i	-4.4317	2.9051	581.547	Scaridae
2011	Front Porch	5	stop	Sparisoma viride	30	i	-4.4317	2.9051	581.547	Scaridae
2011	Front Porch	5	stop	Sparisoma viride	30	i	-4.4317	2.9051	581.547	Scaridae
2011	Front Porch	5	stop	Sparisoma viride	32	i	-4.4317	2.9051	701.473	Scaridae
2011	Front Porch	5	stop	Sparisoma viride	32	i	-4.4317	2.9051	701.473	Scaridae
2011	Front Porch	5	stop	Sparisoma viride	25	t	-4.4317	2.9051	342.417	Scaridae
2011	Front Porch	5	stop	Sparisoma viride	27	t	-4.4317	2.9051	428.208	Scaridae
2011	Front Porch	5	stop	Sparisoma viride	28	t	-4.4317	2.9051	475.925	Scaridae
2011	Front Porch	5	stop	Sparisoma viride	35	t	-4.4317	2.9051	910.064	Scaridae
2011	Front Porch	6	blt	Acanthurus coeruleus	20		-2.8242	2.2638	242.589	Acanthuridae
2011	Front Porch	6	blt	Acanthurus coeruleus	22		-2.8242	2.2638	301.007	Acanthuridae
2011	Front Porch	6	prp	Scarus taeniopterus	32	t	-3.2257	2.3852	561.803	Scaridae
2011	Front Porch	6	qup	Scarus vetula	30	i	-5.0162	3.1109	489.64	Scaridae
2011	Front Porch	6	qup	Scarus vetula	32	t	-5.0162	3.1109	598.51	Scaridae
2011	Front Porch	6	stop	Sparisoma viride	25	i	-4.4317	2.9051	342.417	Scaridae
2011	Front Porch	6	stop	Sparisoma viride	26	i	-4.4317	2.9051	383.742	Scaridae
2011	Front Porch	6	stop	Sparisoma viride	26	i	-4.4317	2.9051	383.742	Scaridae
2011	Front Porch	6	stop	Sparisoma viride	27	i	-4.4317	2.9051	428.208	Scaridae
2011	Front Porch	6	stop	Sparisoma viride	27	i	-4.4317	2.9051	428.208	Scaridae
2011	Front Porch	6	stop	Sparisoma viride	27	i	-4.4317	2.9051	428.208	Scaridae
2011	Front Porch	6	stop	Sparisoma viride	28	i	-4.4317	2.9051	475.925	Scaridae
2011	Front Porch	6	stop	Sparisoma viride	28	i	-4.4317	2.9051	475.925	Scaridae
2011	Front Porch	6	stop	Sparisoma viride	30	i	-4.4317	2.9051	581.547	Scaridae
2011	Front Porch	6	stop	Sparisoma viride	30	i	-4.4317	2.9051	581.547	Scaridae
2011	Front Porch	6	stop	Sparisoma viride	30	i	-4.4317	2.9051	581.547	Scaridae
2011	Front Porch	6	stop	Sparisoma viride	30	i	-4.4317	2.9051	581.547	Scaridae
2011	Front Porch	6	stop	Sparisoma viride	30	i	-4.4317	2.9051	581.547	Scaridae
2011	Front Porch	6	stop	Sparisoma viride	30	i	-4.4317	2.9051	581.547	Scaridae
2011	Front Porch	6	stop	Sparisoma viride	30	i	-4.4317	2.9051	581.547	Scaridae
2011	Front Porch	6	stop	Sparisoma viride	30	i	-4.4317	2.9051	581.547	Scaridae
2011	Front Porch	6	stop	Sparisoma viride	30	i	-4.4317	2.9051	581.547	Scaridae
2011	Front Porch	6	stop	Sparisoma viride	32	i	-4.4317	2.9051	701.473	Scaridae
2011	Front Porch	6	stop	Sparisoma viride	32	i	-4.4317	2.9051	701.473	Scaridae
2011	Front Porch	6	stop	Sparisoma viride	32	i	-4.4317	2.9051	701.473	Scaridae
2011	Front Porch	6	stop	Sparisoma viride	32	i	-4.4317	2.9051	701.473	Scaridae
2011	Front Porch	6	stop	Sparisoma viride	32	t	-4.4317	2.9051	701.473	Scaridae
2011	Front Porch	6	stop	Sparisoma viride	32	t	-4.4317	2.9051	701.473	Scaridae
2011	Front Porch	7	ocs	Acanthurus bahianus	19		-4.6005	2.9752	151.094	Acanthuridae
2011	Front Porch	7	ocs	Acanthurus bahianus	20		-4.6005	2.9752	176.005	Acanthuridae
2011	Front Porch	7	ocs	Acanthurus bahianus	20		-4.6005	2.9752	176.005	Acanthuridae
2011	Front Porch	7	dcf	Acanthurus chirurgus	20		-2.4262	2.0768	225.206	Acanthuridae
2011	Front Porch	7	dcf	Acanthurus chirurgus	25		-2.4262	2.0768	357.966	Acanthuridae
2011	Front Porch	7	blt	Acanthurus coeruleus	18		-2.8242	2.2638	191.111	Acanthuridae
2011	Front Porch	7	strp	Scarus iseri	20	t	-4.8887	3.0548	138.193	Scaridae
2011	Front Porch	7	prp	Scarus taeniopterus	20	i	-3.2257	2.3852	183.112	Scaridae
2011	Front Porch	7	prp	Scarus taeniopterus	20	t	-3.2257	2.3852	183.112	Scaridae
2011	Front Porch	7	rdp	Sparisoma aurofrenatum	20	i	-4.0781	2.7438	171.975	Scaridae
2011	Front Porch	7	rdp	Sparisoma aurofrenatum	20	t	-4.0781	2.7438	171.975	Scaridae
2011	Front Porch	7	stop	Sparisoma viride	21	i	-4.4317	2.9051	206.338	Scaridae
2011	Front Porch	7	stop	Sparisoma viride	22	i	-4.4317	2.9051	236.196	Scaridae
2011	Front Porch	7	stop	Sparisoma viride	22	i	-4.4317	2.9051	236.196	Scaridae
2011	Front Porch	7	stop	Sparisoma viride	22	i	-4.4317	2.9051	236.196	Scaridae
2011	Front Porch	7	stop	Sparisoma viride	23	i	-4.4317	2.9051	268.754	Scaridae
2011	Front Porch	7	stop	Sparisoma viride	27	i	-4.4317	2.9051	428.208	Scaridae
2011	Front Porch	7	stop	Sparisoma viride	27	i	-4.4317	2.9051	428.208	Scaridae
2011	Front Porch	7	stop	Sparisoma viride	27	i	-4.4317	2.9051	428.208	Scaridae
2011	Front Porch	7	stop	Sparisoma viride	27	i	-4.4317	2.9051	428.208	Scaridae
2011	Front Porch	7	stop	Sparisoma viride	27	i	-4.4317	2.9051	428.208	Scaridae
2011	Front Porch	7	stop	Sparisoma viride	27	i	-4.4317	2.9051	428.208	Scaridae
2011	Front Porch	7	stop	Sparisoma viride	28	i	-4.4317	2.9051	475.925	Scaridae
2011	Front Porch	7	stop	Sparisoma viride	28	i	-4.4317	2.9051	475.925	Scaridae
2011	Front Porch	7	stop	Sparisoma viride	28	i	-4.4317	2.9051	475.925	Scaridae
2011	Front Porch	7	stop	Sparisoma viride	28	i	-4.4317	2.9051	475.925	Scaridae
2011	Front Porch	7	stop	Sparisoma viride	28	i	-4.4317	2.9051	475.925	Scaridae
2011	Front Porch	7	stop	Sparisoma viride	28	i	-4.4317	2.9051	475.925	Scaridae
2011	Front Porch	7	stop	Sparisoma viride	30	i	-4.4317	2.9051	581.547	Scaridae
2011	Front Porch	7	stop	Sparisoma viride	30	i	-4.4317	2.9051	581.547	Scaridae
2011	Front Porch	7	stop	Sparisoma viride	30	i	-4.4317	2.9051	581.547	Scaridae
2011	Front Porch	7	stop	Sparisoma viride	30	t	-4.4317	2.9051	581.547	Scaridae
2011	Front Porch	7	stop	Sparisoma viride	30	t	-4.4317	2.9051	581.547	Scaridae
2011	Front Porch	7	stop	Sparisoma viride	32	t	-4.4317	2.9051	701.473	Scaridae
2011	Front Porch	7	stop	Sparisoma viride	32	t	-4.4317	2.9051	701.473	Scaridae
2011	Front Porch	8	ocs	Acanthurus bahianus	18		-4.6005	2.9752	128.643	Acanthuridae
2011	Front Porch	8	prp	Scarus taeniopterus	20	i	-3.2257	2.3852	183.112	Scaridae
2011	Front Porch	8	prp	Scarus taeniopterus	22	i	-3.2257	2.3852	229.851	Scaridae
2011	Front Porch	8	prp	Scarus taeniopterus	23	t	-3.2257	2.3852	255.56	Scaridae
2011	Front Porch	8	prp	Scarus taeniopterus	23	t	-3.2257	2.3852	255.56	Scaridae
2011	Front Porch	8	qup	Scarus vetula	40	t	-5.0162	3.1109	1198.25	Scaridae
2011	Front Porch	8	rdp	Sparisoma aurofrenatum	18	i	-4.0781	2.7438	128.8	Scaridae
2011	Front Porch	8	rdp	Sparisoma aurofrenatum	23	i	-4.0781	2.7438	252.353	Scaridae
2011	Front Porch	8	rdp	Sparisoma aurofrenatum	25	t	-4.0781	2.7438	317.225	Scaridae
2011	Front Porch	8	stop	Sparisoma viride	21	i	-4.4317	2.9051	206.338	Scaridae
2011	Front Porch	8	stop	Sparisoma viride	22	i	-4.4317	2.9051	236.196	Scaridae
2011	Front Porch	8	stop	Sparisoma viride	23	i	-4.4317	2.9051	268.754	Scaridae
2011	Front Porch	8	stop	Sparisoma viride	23	i	-4.4317	2.9051	268.754	Scaridae
2011	Front Porch	8	stop	Sparisoma viride	23	i	-4.4317	2.9051	268.754	Scaridae
2011	Front Porch	8	stop	Sparisoma viride	24	i	-4.4317	2.9051	304.125	Scaridae
2011	Front Porch	8	stop	Sparisoma viride	25	i	-4.4317	2.9051	342.417	Scaridae
2011	Front Porch	8	stop	Sparisoma viride	25	i	-4.4317	2.9051	342.417	Scaridae
2011	Front Porch	8	stop	Sparisoma viride	28	i	-4.4317	2.9051	475.925	Scaridae
2011	Front Porch	8	stop	Sparisoma viride	28	i	-4.4317	2.9051	475.925	Scaridae
2011	Front Porch	8	stop	Sparisoma viride	28	i	-4.4317	2.9051	475.925	Scaridae
2011	Front Porch	8	stop	Sparisoma viride	28	i	-4.4317	2.9051	475.925	Scaridae
2011	Front Porch	8	stop	Sparisoma viride	28	i	-4.4317	2.9051	475.925	Scaridae
2011	Front Porch	8	stop	Sparisoma viride	30	i	-4.4317	2.9051	581.547	Scaridae
2011	Front Porch	8	stop	Sparisoma viride	35	t	-4.4317	2.9051	910.064	Scaridae
2011	Karpata	1	ytd	Microspathodon chrysurus	15		-4.7033	3.0825	101.042	Pomacentridae
2011	Karpata	1	prp	Scarus taeniopterus	22	i	-3.2257	2.3852	229.851	Scaridae
2011	Karpata	1	qup	Scarus vetula	22	i	-5.0162	3.1109	186.57	Scaridae
2011	Karpata	1	rdp	Sparisoma aurofrenatum	20	i	-4.0781	2.7438	171.975	Scaridae
2011	Karpata	1	stop	Sparisoma viride	31	i	-4.4317	2.9051	639.668	Scaridae
2011	Karpata	1	stop	Sparisoma viride	32	t	-4.4317	2.9051	701.473	Scaridae
2011	Karpata	1	stop	Sparisoma viride	32	t	-4.4317	2.9051	701.473	Scaridae
2011	Karpata	1	stop	Sparisoma viride	32	t	-4.4317	2.9051	701.473	Scaridae
2011	Karpata	2	blt	Acanthurus coeruleus	18		-2.8242	2.2638	191.111	Acanthuridae
2011	Karpata	2	ytd	Microspathodon chrysurus	30		-4.7033	3.0825	855.906	Pomacentridae
2011	Karpata	2	prp	Scarus taeniopterus	18	i	-3.2257	2.3852	142.422	Scaridae
2011	Karpata	2	prp	Scarus taeniopterus	18	i	-3.2257	2.3852	142.422	Scaridae
2011	Karpata	2	prp	Scarus taeniopterus	22	i	-3.2257	2.3852	229.851	Scaridae
2011	Karpata	2	prp	Scarus taeniopterus	6	j	-3.2257	2.3852	10.3645	Scaridae
2011	Karpata	2	prp	Scarus taeniopterus	23	t	-3.2257	2.3852	255.56	Scaridae
2011	Karpata	2	qup	Scarus vetula	32	i	-5.0162	3.1109	598.51	Scaridae
2011	Karpata	2	qup	Scarus vetula	32	t	-5.0162	3.1109	598.51	Scaridae
2011	Karpata	2	stop	Sparisoma viride	31	t	-4.4317	2.9051	639.668	Scaridae
2011	Karpata	2	stop	Sparisoma viride	31	t	-4.4317	2.9051	639.668	Scaridae
2011	Karpata	3	blt	Acanthurus coeruleus	20		-2.8242	2.2638	242.589	Acanthuridae
2011	Karpata	3	blt	Acanthurus coeruleus	20		-2.8242	2.2638	242.589	Acanthuridae
2011	Karpata	3	ytd	Microspathodon chrysurus	14		-4.7033	3.0825	81.6845	Pomacentridae
2011	Karpata	3	prp	Scarus taeniopterus	18	i	-3.2257	2.3852	142.422	Scaridae
2011	Karpata	3	prp	Scarus taeniopterus	18	i	-3.2257	2.3852	142.422	Scaridae
2011	Karpata	3	prp	Scarus taeniopterus	20	i	-3.2257	2.3852	183.112	Scaridae
2011	Karpata	3	prp	Scarus taeniopterus	8	j	-3.2257	2.3852	20.585	Scaridae
2011	Karpata	3	prp	Scarus taeniopterus	10	j	-3.2257	2.3852	35.051	Scaridae
2011	Karpata	3	prp	Scarus taeniopterus	23	t	-3.2257	2.3852	255.56	Scaridae
2011	Karpata	3	qup	Scarus vetula	32	i	-5.0162	3.1109	598.51	Scaridae
2011	Karpata	3	qup	Scarus vetula	32	t	-5.0162	3.1109	598.51	Scaridae
2011	Karpata	3	stop	Sparisoma viride	18	i	-4.4317	2.9051	131.854	Scaridae
2011	Karpata	3	stop	Sparisoma viride	32	t	-4.4317	2.9051	701.473	Scaridae
2011	Karpata	3	stop	Sparisoma viride	32	t	-4.4317	2.9051	701.473	Scaridae
2011	Karpata	4	blt	Acanthurus coeruleus	18		-2.8242	2.2638	191.111	Acanthuridae
2011	Karpata	4	ytd	Microspathodon chrysurus	17		-4.7033	3.0825	148.614	Pomacentridae
2011	Karpata	4	prp	Scarus taeniopterus	18	i	-3.2257	2.3852	142.422	Scaridae
2011	Karpata	4	prp	Scarus taeniopterus	10	j	-3.2257	2.3852	35.051	Scaridae
2011	Karpata	4	prp	Scarus taeniopterus	12	j	-3.2257	2.3852	54.1456	Scaridae
2011	Karpata	4	qup	Scarus vetula	17	i	-5.0162	3.1109	83.6572	Scaridae
2011	Karpata	4	qup	Scarus vetula	25	i	-5.0162	3.1109	277.684	Scaridae
2011	Karpata	4	qup	Scarus vetula	30	i	-5.0162	3.1109	489.64	Scaridae
2011	Karpata	4	stop	Sparisoma viride	15	i	-4.4317	2.9051	77.6359	Scaridae
2011	Karpata	4	stop	Sparisoma viride	35	t	-4.4317	2.9051	910.064	Scaridae
2011	Karpata	5	ytd	Microspathodon chrysurus	13		-4.7033	3.0825	65.0025	Pomacentridae
2011	Karpata	5	ytd	Microspathodon chrysurus	14		-4.7033	3.0825	81.6845	Pomacentridae
2011	Karpata	5	ytd	Microspathodon chrysurus	15		-4.7033	3.0825	101.042	Pomacentridae
2011	Karpata	5	ytd	Microspathodon chrysurus	19		-4.7033	3.0825	209.391	Pomacentridae
2011	Karpata	5	prp	Scarus taeniopterus	19	i	-3.2257	2.3852	162.025	Scaridae
2011	Karpata	5	qup	Scarus vetula	19	i	-5.0162	3.1109	118.243	Scaridae
2011	Karpata	5	qup	Scarus vetula	35	t	-5.0162	3.1109	790.936	Scaridae
2011	Karpata	5	rdp	Sparisoma aurofrenatum	19	t	-4.0781	2.7438	149.398	Scaridae
2011	Karpata	5	stop	Sparisoma viride	22	i	-4.4317	2.9051	236.196	Scaridae
2011	Karpata	5	stop	Sparisoma viride	23	i	-4.4317	2.9051	268.754	Scaridae
2011	Karpata	5	stop	Sparisoma viride	25	i	-4.4317	2.9051	342.417	Scaridae
2011	Karpata	5	stop	Sparisoma viride	32	t	-4.4317	2.9051	701.473	Scaridae
2011	Karpata	5	stop	Sparisoma viride	33	t	-4.4317	2.9051	767.07	Scaridae
2011	Karpata	6	ytd	Microspathodon chrysurus	17		-4.7033	3.0825	148.614	Pomacentridae
2011	Karpata	6	prp	Scarus taeniopterus	20	i	-3.2257	2.3852	183.112	Scaridae
2011	Karpata	6	prp	Scarus taeniopterus	23	i	-3.2257	2.3852	255.56	Scaridae
2011	Karpata	6	prp	Scarus taeniopterus	18	t	-3.2257	2.3852	142.422	Scaridae
2011	Karpata	6	prp	Scarus taeniopterus	23	t	-3.2257	2.3852	255.56	Scaridae
2011	Karpata	6	prp	Scarus taeniopterus	24	t	-3.2257	2.3852	282.865	Scaridae
2011	Karpata	6	qup	Scarus vetula	22	i	-5.0162	3.1109	186.57	Scaridae
2011	Karpata	6	qup	Scarus vetula	32	t	-5.0162	3.1109	598.51	Scaridae
2011	Karpata	6	qup	Scarus vetula	34	t	-5.0162	3.1109	722.733	Scaridae
2011	Karpata	6	stop	Sparisoma viride	30	i	-4.4317	2.9051	581.547	Scaridae
2011	Karpata	7	blt	Acanthurus coeruleus	12		-2.8242	2.2638	76.3221	Acanthuridae
2011	Karpata	7	blt	Acanthurus coeruleus	13		-2.8242	2.2638	91.484	Acanthuridae
2011	Karpata	7	blt	Acanthurus coeruleus	18		-2.8242	2.2638	191.111	Acanthuridae
2011	Karpata	7	prp	Scarus taeniopterus	13	i	-3.2257	2.3852	65.5357	Scaridae
2011	Karpata	7	prp	Scarus taeniopterus	17	i	-3.2257	2.3852	124.27	Scaridae
2011	Karpata	7	prp	Scarus taeniopterus	18	i	-3.2257	2.3852	142.422	Scaridae
2011	Karpata	7	prp	Scarus taeniopterus	20	i	-3.2257	2.3852	183.112	Scaridae
2011	Karpata	7	qup	Scarus vetula	25	i	-5.0162	3.1109	277.684	Scaridae
2011	Karpata	7	rdp	Sparisoma aurofrenatum	12	j	-4.0781	2.7438	42.3406	Scaridae
2011	Karpata	7	stop	Sparisoma viride	11	j	-4.4317	2.9051	31.5319	Scaridae
2011	Karpata	7	stop	Sparisoma viride	32	t	-4.4317	2.9051	701.473	Scaridae
2011	Karpata	7	stop	Sparisoma viride	32	t	-4.4317	2.9051	701.473	Scaridae
2011	Karpata	8	blt	Acanthurus coeruleus	20		-2.8242	2.2638	242.589	Acanthuridae
2011	Karpata	8	ytd	Microspathodon chrysurus	18		-4.7033	3.0825	177.246	Pomacentridae
2011	Karpata	8	prp	Scarus taeniopterus	18	i	-3.2257	2.3852	142.422	Scaridae
2011	Karpata	8	prp	Scarus taeniopterus	23	t	-3.2257	2.3852	255.56	Scaridae
2011	Karpata	8	qup	Scarus vetula	23	i	-5.0162	3.1109	214.239	Scaridae
2011	Karpata	8	qup	Scarus vetula	24	i	-5.0162	3.1109	244.568	Scaridae
2011	Karpata	8	qup	Scarus vetula	35	t	-5.0162	3.1109	790.936	Scaridae
2011	Karpata	8	rdp	Sparisoma aurofrenatum	23	t	-4.0781	2.7438	252.353	Scaridae
2011	Karpata	8	stop	Sparisoma viride	30	i	-4.4317	2.9051	581.547	Scaridae
2011	Karpata	8	stop	Sparisoma viride	32	t	-4.4317	2.9051	701.473	Scaridae
2011	No-Dive Reserve	1	blt	Acanthurus coeruleus	18		-2.8242	2.2638	191.111	Acanthuridae
2011	No-Dive Reserve	1	ytd	Microspathodon chrysurus	13		-4.7033	3.0825	65.0025	Pomacentridae
2011	No-Dive Reserve	1	ytd	Microspathodon chrysurus	13		-4.7033	3.0825	65.0025	Pomacentridae
2011	No-Dive Reserve	1	prp	Scarus taeniopterus	20	i	-3.2257	2.3852	183.112	Scaridae
2011	No-Dive Reserve	1	prp	Scarus taeniopterus	22	i	-3.2257	2.3852	229.851	Scaridae
2011	No-Dive Reserve	1	prp	Scarus taeniopterus	5	j	-3.2257	2.3852	6.70939	Scaridae
2011	No-Dive Reserve	1	prp	Scarus taeniopterus	7	j	-3.2257	2.3852	14.9702	Scaridae
2011	No-Dive Reserve	1	prp	Scarus taeniopterus	7	j	-3.2257	2.3852	14.9702	Scaridae
2011	No-Dive Reserve	1	prp	Scarus taeniopterus	9	j	-3.2257	2.3852	27.2621	Scaridae
2011	No-Dive Reserve	1	prp	Scarus taeniopterus	9	j	-3.2257	2.3852	27.2621	Scaridae
2011	No-Dive Reserve	1	prp	Scarus taeniopterus	10	j	-3.2257	2.3852	35.051	Scaridae
2011	No-Dive Reserve	1	prp	Scarus taeniopterus	12	j	-3.2257	2.3852	54.1456	Scaridae
2011	No-Dive Reserve	1	qup	Scarus vetula	35	t	-5.0162	3.1109	790.936	Scaridae
2011	No-Dive Reserve	1	stop	Sparisoma viride	13	i	-4.4317	2.9051	51.2291	Scaridae
2011	No-Dive Reserve	1	stop	Sparisoma viride	16	i	-4.4317	2.9051	93.6459	Scaridae
2011	No-Dive Reserve	2	prp	Scarus taeniopterus	15	i	-3.2257	2.3852	92.1962	Scaridae
2011	No-Dive Reserve	2	prp	Scarus taeniopterus	18	i	-3.2257	2.3852	142.422	Scaridae
2011	No-Dive Reserve	2	prp	Scarus taeniopterus	18	i	-3.2257	2.3852	142.422	Scaridae
2011	No-Dive Reserve	2	prp	Scarus taeniopterus	20	i	-3.2257	2.3852	183.112	Scaridae
2011	No-Dive Reserve	2	prp	Scarus taeniopterus	23	i	-3.2257	2.3852	255.56	Scaridae
2011	No-Dive Reserve	2	prp	Scarus taeniopterus	23	t	-3.2257	2.3852	255.56	Scaridae
2011	No-Dive Reserve	2	prp	Scarus taeniopterus	23	t	-3.2257	2.3852	255.56	Scaridae
2011	No-Dive Reserve	2	qup	Scarus vetula	20	i	-5.0162	3.1109	138.699	Scaridae
2011	No-Dive Reserve	2	qup	Scarus vetula	25	i	-5.0162	3.1109	277.684	Scaridae
2011	No-Dive Reserve	2	rdp	Sparisoma aurofrenatum	20	i	-4.0781	2.7438	171.975	Scaridae
2011	No-Dive Reserve	2	rdp	Sparisoma aurofrenatum	23	i	-4.0781	2.7438	252.353	Scaridae
2011	No-Dive Reserve	2	stop	Sparisoma viride	12	i	-4.4317	2.9051	40.6003	Scaridae
2011	No-Dive Reserve	2	stop	Sparisoma viride	20	i	-4.4317	2.9051	179.07	Scaridae
2011	No-Dive Reserve	2	stop	Sparisoma viride	23	i	-4.4317	2.9051	268.754	Scaridae
2011	No-Dive Reserve	2	stop	Sparisoma viride	25	i	-4.4317	2.9051	342.417	Scaridae
2011	No-Dive Reserve	2	stop	Sparisoma viride	4	j	-4.4317	2.9051	1.66895	Scaridae
2011	No-Dive Reserve	3	blt	Acanthurus coeruleus	18		-2.8242	2.2638	191.111	Acanthuridae
2011	No-Dive Reserve	3	prp	Scarus taeniopterus	15	i	-3.2257	2.3852	92.1962	Scaridae
2011	No-Dive Reserve	3	prp	Scarus taeniopterus	17	i	-3.2257	2.3852	124.27	Scaridae
2011	No-Dive Reserve	3	prp	Scarus taeniopterus	18	i	-3.2257	2.3852	142.422	Scaridae
2011	No-Dive Reserve	3	prp	Scarus taeniopterus	20	i	-3.2257	2.3852	183.112	Scaridae
2011	No-Dive Reserve	3	prp	Scarus taeniopterus	20	i	-3.2257	2.3852	183.112	Scaridae
2011	No-Dive Reserve	3	prp	Scarus taeniopterus	20	i	-3.2257	2.3852	183.112	Scaridae
2011	No-Dive Reserve	3	prp	Scarus taeniopterus	22	i	-3.2257	2.3852	229.851	Scaridae
2011	No-Dive Reserve	3	prp	Scarus taeniopterus	4	j	-3.2257	2.3852	3.94034	Scaridae
2011	No-Dive Reserve	3	prp	Scarus taeniopterus	5	j	-3.2257	2.3852	6.70939	Scaridae
2011	No-Dive Reserve	3	prp	Scarus taeniopterus	7	j	-3.2257	2.3852	14.9702	Scaridae
2011	No-Dive Reserve	3	prp	Scarus taeniopterus	10	j	-3.2257	2.3852	35.051	Scaridae
2011	No-Dive Reserve	3	prp	Scarus taeniopterus	11	j	-3.2257	2.3852	43.9977	Scaridae
2011	No-Dive Reserve	3	prp	Scarus taeniopterus	12	j	-3.2257	2.3852	54.1456	Scaridae
2011	No-Dive Reserve	3	qup	Scarus vetula	22	i	-5.0162	3.1109	186.57	Scaridae
2011	No-Dive Reserve	3	rdp	Sparisoma aurofrenatum	23	t	-4.0781	2.7438	252.353	Scaridae
2011	No-Dive Reserve	3	stop	Sparisoma viride	9	i	-4.4317	2.9051	17.6023	Scaridae
2011	No-Dive Reserve	3	stop	Sparisoma viride	22	i	-4.4317	2.9051	236.196	Scaridae
2011	No-Dive Reserve	3	stop	Sparisoma viride	7	j	-4.4317	2.9051	8.48192	Scaridae
2011	No-Dive Reserve	3	stop	Sparisoma viride	35	t	-4.4317	2.9051	910.064	Scaridae
2011	No-Dive Reserve	4	blt	Acanthurus coeruleus	20		-2.8242	2.2638	242.589	Acanthuridae
2011	No-Dive Reserve	4	ytd	Microspathodon chrysurus	12		-4.7033	3.0825	50.7898	Pomacentridae
2011	No-Dive Reserve	4	prp	Scarus taeniopterus	18	i	-3.2257	2.3852	142.422	Scaridae
2011	No-Dive Reserve	4	prp	Scarus taeniopterus	20	i	-3.2257	2.3852	183.112	Scaridae
2011	No-Dive Reserve	4	prp	Scarus taeniopterus	10	j	-3.2257	2.3852	35.051	Scaridae
2011	No-Dive Reserve	4	prp	Scarus taeniopterus	10	j	-3.2257	2.3852	35.051	Scaridae
2011	No-Dive Reserve	4	prp	Scarus taeniopterus	12	j	-3.2257	2.3852	54.1456	Scaridae
2011	No-Dive Reserve	4	prp	Scarus taeniopterus	24	t	-3.2257	2.3852	282.865	Scaridae
2011	No-Dive Reserve	4	stop	Sparisoma viride	12	i	-4.4317	2.9051	40.6003	Scaridae
2011	No-Dive Reserve	4	stop	Sparisoma viride	15	i	-4.4317	2.9051	77.6359	Scaridae
2011	No-Dive Reserve	4	stop	Sparisoma viride	25	i	-4.4317	2.9051	342.417	Scaridae
2011	No-Dive Reserve	4	stop	Sparisoma viride	10	j	-4.4317	2.9051	23.9056	Scaridae
2011	No-Dive Reserve	4	stop	Sparisoma viride	12	j	-4.4317	2.9051	40.6003	Scaridae
2011	No-Dive Reserve	5	prp	Scarus taeniopterus	15	i	-3.2257	2.3852	92.1962	Scaridae
2011	No-Dive Reserve	5	prp	Scarus taeniopterus	17	i	-3.2257	2.3852	124.27	Scaridae
2011	No-Dive Reserve	5	prp	Scarus taeniopterus	20	i	-3.2257	2.3852	183.112	Scaridae
2011	No-Dive Reserve	5	prp	Scarus taeniopterus	23	i	-3.2257	2.3852	255.56	Scaridae
2011	No-Dive Reserve	5	prp	Scarus taeniopterus	7	j	-3.2257	2.3852	14.9702	Scaridae
2011	No-Dive Reserve	5	prp	Scarus taeniopterus	8	j	-3.2257	2.3852	20.585	Scaridae
2011	No-Dive Reserve	5	prp	Scarus taeniopterus	9	j	-3.2257	2.3852	27.2621	Scaridae
2011	No-Dive Reserve	5	prp	Scarus taeniopterus	23	t	-3.2257	2.3852	255.56	Scaridae
2011	No-Dive Reserve	5	rdp	Sparisoma aurofrenatum	23	t	-4.0781	2.7438	252.353	Scaridae
2011	No-Dive Reserve	5	rdp	Sparisoma aurofrenatum	23	t	-4.0781	2.7438	252.353	Scaridae
2011	No-Dive Reserve	5	stop	Sparisoma viride	13	i	-4.4317	2.9051	51.2291	Scaridae
2011	No-Dive Reserve	5	stop	Sparisoma viride	32	i	-4.4317	2.9051	701.473	Scaridae
2011	No-Dive Reserve	5	stop	Sparisoma viride	10	j	-4.4317	2.9051	23.9056	Scaridae
2011	No-Dive Reserve	6	blt	Acanthurus coeruleus	18		-2.8242	2.2638	191.111	Acanthuridae
2011	No-Dive Reserve	6	ytd	Microspathodon chrysurus	18		-4.7033	3.0825	177.246	Pomacentridae
2011	No-Dive Reserve	6	prp	Scarus taeniopterus	18	i	-3.2257	2.3852	142.422	Scaridae
2011	No-Dive Reserve	6	prp	Scarus taeniopterus	20	i	-3.2257	2.3852	183.112	Scaridae
2011	No-Dive Reserve	6	prp	Scarus taeniopterus	10	j	-3.2257	2.3852	35.051	Scaridae
2011	No-Dive Reserve	6	prp	Scarus taeniopterus	23	t	-3.2257	2.3852	255.56	Scaridae
2011	No-Dive Reserve	6	stop	Sparisoma viride	28	i	-4.4317	2.9051	475.925	Scaridae
2011	No-Dive Reserve	6	stop	Sparisoma viride	30	i	-4.4317	2.9051	581.547	Scaridae
2011	Oil Slick	1	blt	Acanthurus coeruleus	18		-2.8242	2.2638	191.111	Acanthuridae
2011	Oil Slick	1	blt	Acanthurus coeruleus	19		-2.8242	2.2638	215.994	Acanthuridae
2011	Oil Slick	1	blt	Acanthurus coeruleus	19		-2.8242	2.2638	215.994	Acanthuridae
2011	Oil Slick	1	blt	Acanthurus coeruleus	20		-2.8242	2.2638	242.589	Acanthuridae
2011	Oil Slick	1	ytd	Microspathodon chrysurus	15		-4.7033	3.0825	101.042	Pomacentridae
2011	Oil Slick	1	ytd	Microspathodon chrysurus	18		-4.7033	3.0825	177.246	Pomacentridae
2011	Oil Slick	1	prp	Scarus taeniopterus	23	t	-3.2257	2.3852	255.56	Scaridae
2011	Oil Slick	1	rdp	Sparisoma aurofrenatum	20	t	-4.0781	2.7438	171.975	Scaridae
2011	Oil Slick	1	rdp	Sparisoma aurofrenatum	20	t	-4.0781	2.7438	171.975	Scaridae
2011	Oil Slick	1	rdp	Sparisoma aurofrenatum	21	t	-4.0781	2.7438	196.61	Scaridae
2011	Oil Slick	1	stop	Sparisoma viride	18	i	-4.4317	2.9051	131.854	Scaridae
2011	Oil Slick	1	stop	Sparisoma viride	20	i	-4.4317	2.9051	179.07	Scaridae
2011	Oil Slick	1	stop	Sparisoma viride	32	i	-4.4317	2.9051	701.473	Scaridae
2011	Oil Slick	1	stop	Sparisoma viride	33	i	-4.4317	2.9051	767.07	Scaridae
2011	Oil Slick	1	stop	Sparisoma viride	33	t	-4.4317	2.9051	767.07	Scaridae
2011	Oil Slick	2	ocs	Acanthurus bahianus	20		-4.6005	2.9752	176.005	Acanthuridae
2011	Oil Slick	2	ytd	Microspathodon chrysurus	18		-4.7033	3.0825	177.246	Pomacentridae
2011	Oil Slick	2	prp	Scarus taeniopterus	25	t	-3.2257	2.3852	311.793	Scaridae
2011	Oil Slick	2	qup	Scarus vetula	22	i	-5.0162	3.1109	186.57	Scaridae
2011	Oil Slick	2	qup	Scarus vetula	30	i	-5.0162	3.1109	489.64	Scaridae
2011	Oil Slick	2	qup	Scarus vetula	36	t	-5.0162	3.1109	863.379	Scaridae
2011	Oil Slick	2	stop	Sparisoma viride	28	i	-4.4317	2.9051	475.925	Scaridae
2011	Oil Slick	2	stop	Sparisoma viride	30	i	-4.4317	2.9051	581.547	Scaridae
2011	Oil Slick	2	stop	Sparisoma viride	30	i	-4.4317	2.9051	581.547	Scaridae
2011	Oil Slick	2	stop	Sparisoma viride	31	i	-4.4317	2.9051	639.668	Scaridae
2011	Oil Slick	2	stop	Sparisoma viride	32	i	-4.4317	2.9051	701.473	Scaridae
2011	Oil Slick	2	stop	Sparisoma viride	32	t	-4.4317	2.9051	701.473	Scaridae
2011	Oil Slick	2	stop	Sparisoma viride	32	t	-4.4317	2.9051	701.473	Scaridae
2011	Oil Slick	3	blt	Acanthurus coeruleus	15		-2.8242	2.2638	126.484	Acanthuridae
2011	Oil Slick	3	ytd	Microspathodon chrysurus	15		-4.7033	3.0825	101.042	Pomacentridae
2011	Oil Slick	3	strp	Scarus iseri	18	t	-4.8887	3.0548	100.163	Scaridae
2011	Oil Slick	3	prp	Scarus taeniopterus	15	i	-3.2257	2.3852	92.1962	Scaridae
2011	Oil Slick	3	prp	Scarus taeniopterus	20	i	-3.2257	2.3852	183.112	Scaridae
2011	Oil Slick	3	prp	Scarus taeniopterus	10	j	-3.2257	2.3852	35.051	Scaridae
2011	Oil Slick	3	prp	Scarus taeniopterus	11	j	-3.2257	2.3852	43.9977	Scaridae
2011	Oil Slick	3	prp	Scarus taeniopterus	12	j	-3.2257	2.3852	54.1456	Scaridae
2011	Oil Slick	3	prp	Scarus taeniopterus	20	t	-3.2257	2.3852	183.112	Scaridae
2011	Oil Slick	3	prp	Scarus taeniopterus	20	t	-3.2257	2.3852	183.112	Scaridae
2011	Oil Slick	3	prp	Scarus taeniopterus	25	t	-3.2257	2.3852	311.793	Scaridae
2011	Oil Slick	3	qup	Scarus vetula	35	t	-5.0162	3.1109	790.936	Scaridae
2011	Oil Slick	3	qup	Scarus vetula	35	t	-5.0162	3.1109	790.936	Scaridae
2011	Oil Slick	3	stop	Sparisoma viride	28	i	-4.4317	2.9051	475.925	Scaridae
2011	Oil Slick	3	stop	Sparisoma viride	31	i	-4.4317	2.9051	639.668	Scaridae
2011	Oil Slick	3	stop	Sparisoma viride	33	t	-4.4317	2.9051	767.07	Scaridae
2011	Oil Slick	3	stop	Sparisoma viride	33	t	-4.4317	2.9051	767.07	Scaridae
2011	Oil Slick	4	ocs	Acanthurus bahianus	13		-4.6005	2.9752	48.8545	Acanthuridae
2011	Oil Slick	4	ocs	Acanthurus bahianus	13		-4.6005	2.9752	48.8545	Acanthuridae
2011	Oil Slick	4	ocs	Acanthurus bahianus	13		-4.6005	2.9752	48.8545	Acanthuridae
2011	Oil Slick	4	ocs	Acanthurus bahianus	13		-4.6005	2.9752	48.8545	Acanthuridae
2011	Oil Slick	4	ocs	Acanthurus bahianus	13		-4.6005	2.9752	48.8545	Acanthuridae
2011	Oil Slick	4	ocs	Acanthurus bahianus	13		-4.6005	2.9752	48.8545	Acanthuridae
2011	Oil Slick	4	ocs	Acanthurus bahianus	13		-4.6005	2.9752	48.8545	Acanthuridae
2011	Oil Slick	4	ocs	Acanthurus bahianus	13		-4.6005	2.9752	48.8545	Acanthuridae
2011	Oil Slick	4	ocs	Acanthurus bahianus	13		-4.6005	2.9752	48.8545	Acanthuridae
2011	Oil Slick	4	ocs	Acanthurus bahianus	13		-4.6005	2.9752	48.8545	Acanthuridae
2011	Oil Slick	4	ocs	Acanthurus bahianus	18		-4.6005	2.9752	128.643	Acanthuridae
2011	Oil Slick	4	ocs	Acanthurus bahianus	20		-4.6005	2.9752	176.005	Acanthuridae
2011	Oil Slick	4	blt	Acanthurus coeruleus	18		-2.8242	2.2638	191.111	Acanthuridae
2011	Oil Slick	4	blt	Acanthurus coeruleus	18		-2.8242	2.2638	191.111	Acanthuridae
2011	Oil Slick	4	blt	Acanthurus coeruleus	18		-2.8242	2.2638	191.111	Acanthuridae
2011	Oil Slick	4	blt	Acanthurus coeruleus	18		-2.8242	2.2638	191.111	Acanthuridae
2011	Oil Slick	4	blt	Acanthurus coeruleus	18		-2.8242	2.2638	191.111	Acanthuridae
2011	Oil Slick	4	blt	Acanthurus coeruleus	19		-2.8242	2.2638	215.994	Acanthuridae
2011	Oil Slick	4	blt	Acanthurus coeruleus	19		-2.8242	2.2638	215.994	Acanthuridae
2011	Oil Slick	4	blt	Acanthurus coeruleus	19		-2.8242	2.2638	215.994	Acanthuridae
2011	Oil Slick	4	blt	Acanthurus coeruleus	19		-2.8242	2.2638	215.994	Acanthuridae
2011	Oil Slick	4	blt	Acanthurus coeruleus	19		-2.8242	2.2638	215.994	Acanthuridae
2011	Oil Slick	4	blt	Acanthurus coeruleus	19		-2.8242	2.2638	215.994	Acanthuridae
2011	Oil Slick	4	blt	Acanthurus coeruleus	19		-2.8242	2.2638	215.994	Acanthuridae
2011	Oil Slick	4	blt	Acanthurus coeruleus	19		-2.8242	2.2638	215.994	Acanthuridae
2011	Oil Slick	4	blt	Acanthurus coeruleus	19		-2.8242	2.2638	215.994	Acanthuridae
2011	Oil Slick	4	blt	Acanthurus coeruleus	19		-2.8242	2.2638	215.994	Acanthuridae
2011	Oil Slick	4	ytd	Microspathodon chrysurus	14		-4.7033	3.0825	81.6845	Pomacentridae
2011	Oil Slick	4	ytd	Microspathodon chrysurus	15		-4.7033	3.0825	101.042	Pomacentridae
2011	Oil Slick	4	ytd	Microspathodon chrysurus	18		-4.7033	3.0825	177.246	Pomacentridae
2011	Oil Slick	4	prp	Scarus taeniopterus	16	i	-3.2257	2.3852	107.539	Scaridae
2011	Oil Slick	4	prp	Scarus taeniopterus	7	j	-3.2257	2.3852	14.9702	Scaridae
2011	Oil Slick	4	prp	Scarus taeniopterus	13	j	-3.2257	2.3852	65.5357	Scaridae
2011	Oil Slick	4	prp	Scarus taeniopterus	13	j	-3.2257	2.3852	65.5357	Scaridae
2011	Oil Slick	4	prp	Scarus taeniopterus	14	j	-3.2257	2.3852	78.2068	Scaridae
2011	Oil Slick	4	qup	Scarus vetula	32	i	-5.0162	3.1109	598.51	Scaridae
2011	Oil Slick	4	rdp	Sparisoma aurofrenatum	19	i	-4.0781	2.7438	149.398	Scaridae
2011	Oil Slick	4	rdp	Sparisoma aurofrenatum	19	i	-4.0781	2.7438	149.398	Scaridae
2011	Oil Slick	4	rdp	Sparisoma aurofrenatum	20	i	-4.0781	2.7438	171.975	Scaridae
2011	Oil Slick	4	rdp	Sparisoma aurofrenatum	22	i	-4.0781	2.7438	223.377	Scaridae
2011	Oil Slick	4	rdp	Sparisoma aurofrenatum	20	t	-4.0781	2.7438	171.975	Scaridae
2011	Oil Slick	4	stop	Sparisoma viride	13	i	-4.4317	2.9051	51.2291	Scaridae
2011	Oil Slick	4	stop	Sparisoma viride	28	i	-4.4317	2.9051	475.925	Scaridae
2011	Oil Slick	4	stop	Sparisoma viride	30	i	-4.4317	2.9051	581.547	Scaridae
2011	Oil Slick	5	blt	Acanthurus coeruleus	20		-2.8242	2.2638	242.589	Acanthuridae
2011	Oil Slick	5	ytd	Microspathodon chrysurus	13		-4.7033	3.0825	65.0025	Pomacentridae
2011	Oil Slick	5	ytd	Microspathodon chrysurus	18		-4.7033	3.0825	177.246	Pomacentridae
2011	Oil Slick	5	mdp	Scarus coelestinus	45		-4.8764	3.0618	1766.88	Scaridae
2011	Oil Slick	5	prp	Scarus taeniopterus	23	t	-3.2257	2.3852	255.56	Scaridae
2011	Oil Slick	5	prp	Scarus taeniopterus	25	t	-3.2257	2.3852	311.793	Scaridae
2011	Oil Slick	5	prp	Scarus taeniopterus	28	t	-3.2257	2.3852	408.565	Scaridae
2011	Oil Slick	5	qup	Scarus vetula	30	i	-5.0162	3.1109	489.64	Scaridae
2011	Oil Slick	5	qup	Scarus vetula	34	t	-5.0162	3.1109	722.733	Scaridae
2011	Oil Slick	5	qup	Scarus vetula	35	t	-5.0162	3.1109	790.936	Scaridae
2011	Oil Slick	5	rdp	Sparisoma aurofrenatum	18	i	-4.0781	2.7438	128.8	Scaridae
2011	Oil Slick	5	rdp	Sparisoma aurofrenatum	20	i	-4.0781	2.7438	171.975	Scaridae
2011	Oil Slick	5	rdp	Sparisoma aurofrenatum	23	i	-4.0781	2.7438	252.353	Scaridae
2011	Oil Slick	5	stop	Sparisoma viride	25	i	-4.4317	2.9051	342.417	Scaridae
2011	Oil Slick	5	stop	Sparisoma viride	28	i	-4.4317	2.9051	475.925	Scaridae
2011	Oil Slick	5	stop	Sparisoma viride	28	i	-4.4317	2.9051	475.925	Scaridae
2011	Oil Slick	5	stop	Sparisoma viride	30	i	-4.4317	2.9051	581.547	Scaridae
2011	Oil Slick	5	stop	Sparisoma viride	32	t	-4.4317	2.9051	701.473	Scaridae
2011	Oil Slick	5	stop	Sparisoma viride	32	t	-4.4317	2.9051	701.473	Scaridae
2011	Oil Slick	6	ytd	Microspathodon chrysurus	13		-4.7033	3.0825	65.0025	Pomacentridae
2011	Oil Slick	6	ytd	Microspathodon chrysurus	15		-4.7033	3.0825	101.042	Pomacentridae
2011	Oil Slick	6	ytd	Microspathodon chrysurus	18		-4.7033	3.0825	177.246	Pomacentridae
2011	Oil Slick	6	strp	Scarus iseri	22	t	-4.8887	3.0548	184.898	Scaridae
2011	Oil Slick	6	prp	Scarus taeniopterus	8	j	-3.2257	2.3852	20.585	Scaridae
2011	Oil Slick	6	prp	Scarus taeniopterus	10	j	-3.2257	2.3852	35.051	Scaridae
2011	Oil Slick	6	prp	Scarus taeniopterus	13	j	-3.2257	2.3852	65.5357	Scaridae
2011	Oil Slick	6	prp	Scarus taeniopterus	22	t	-3.2257	2.3852	229.851	Scaridae
2011	Oil Slick	6	prp	Scarus taeniopterus	23	t	-3.2257	2.3852	255.56	Scaridae
2011	Oil Slick	6	prp	Scarus taeniopterus	25	t	-3.2257	2.3852	311.793	Scaridae
2011	Oil Slick	6	rdp	Sparisoma aurofrenatum	13	i	-4.0781	2.7438	52.7397	Scaridae
2011	Oil Slick	6	rdp	Sparisoma aurofrenatum	23	t	-4.0781	2.7438	252.353	Scaridae
2011	Oil Slick	6	stop	Sparisoma viride	20	i	-4.4317	2.9051	179.07	Scaridae
2011	Oil Slick	6	stop	Sparisoma viride	28	i	-4.4317	2.9051	475.925	Scaridae
2011	Oil Slick	6	stop	Sparisoma viride	28	i	-4.4317	2.9051	475.925	Scaridae
2011	Oil Slick	6	stop	Sparisoma viride	31	i	-4.4317	2.9051	639.668	Scaridae
2011	Oil Slick	7	blt	Acanthurus coeruleus	20		-2.8242	2.2638	242.589	Acanthuridae
2011	Oil Slick	7	prp	Scarus taeniopterus	12	j	-3.2257	2.3852	54.1456	Scaridae
2011	Oil Slick	7	qup	Scarus vetula	30	i	-5.0162	3.1109	489.64	Scaridae
2011	Oil Slick	7	qup	Scarus vetula	33	t	-5.0162	3.1109	658.635	Scaridae
2011	Oil Slick	7	stop	Sparisoma viride	32	i	-4.4317	2.9051	701.473	Scaridae
2011	Oil Slick	7	ytp	Sparisoma rubripinne	33	t	-4.8701	3.0641	702.876	Scaridae
2011	Oil Slick	8	ytd	Microspathodon chrysurus	12		-4.7033	3.0825	50.7898	Pomacentridae
2011	Oil Slick	8	ytd	Microspathodon chrysurus	15		-4.7033	3.0825	101.042	Pomacentridae
2011	Oil Slick	8	strp	Scarus iseri	28	t	-4.8887	3.0548	386.259	Scaridae
2011	Oil Slick	8	prp	Scarus taeniopterus	11	j	-3.2257	2.3852	43.9977	Scaridae
2011	Oil Slick	8	prp	Scarus taeniopterus	12	j	-3.2257	2.3852	54.1456	Scaridae
2011	Oil Slick	8	prp	Scarus taeniopterus	28	t	-3.2257	2.3852	408.565	Scaridae
2011	Oil Slick	8	qup	Scarus vetula	25	i	-5.0162	3.1109	277.684	Scaridae
2011	Oil Slick	8	qup	Scarus vetula	30	i	-5.0162	3.1109	489.64	Scaridae
2011	Oil Slick	8	stop	Sparisoma viride	22	i	-4.4317	2.9051	236.196	Scaridae
2011	Oil Slick	8	stop	Sparisoma viride	30	i	-4.4317	2.9051	581.547	Scaridae
2011	Reef Scientifico	1	blt	Acanthurus coeruleus	16		-2.8242	2.2638	146.382	Acanthuridae
2011	Reef Scientifico	1	blt	Acanthurus coeruleus	18		-2.8242	2.2638	191.111	Acanthuridae
2011	Reef Scientifico	1	ytd	Microspathodon chrysurus	11		-4.7033	3.0825	38.8412	Pomacentridae
2011	Reef Scientifico	1	prp	Scarus taeniopterus	10	j	-3.2257	2.3852	35.051	Scaridae
2011	Reef Scientifico	1	prp	Scarus taeniopterus	23	t	-3.2257	2.3852	255.56	Scaridae
2011	Reef Scientifico	1	qup	Scarus vetula	35	t	-5.0162	3.1109	790.936	Scaridae
2011	Reef Scientifico	1	rdp	Sparisoma aurofrenatum	22	i	-4.0781	2.7438	223.377	Scaridae
2011	Reef Scientifico	1	stop	Sparisoma viride	22	i	-4.4317	2.9051	236.196	Scaridae
2011	Reef Scientifico	2	blt	Acanthurus coeruleus	18		-2.8242	2.2638	191.111	Acanthuridae
2011	Reef Scientifico	2	ytd	Microspathodon chrysurus	18		-4.7033	3.0825	177.246	Pomacentridae
2011	Reef Scientifico	2	prp	Scarus taeniopterus	17	i	-3.2257	2.3852	124.27	Scaridae
2011	Reef Scientifico	2	prp	Scarus taeniopterus	25	i	-3.2257	2.3852	311.793	Scaridae
2011	Reef Scientifico	2	prp	Scarus taeniopterus	27	t	-3.2257	2.3852	374.618	Scaridae
2011	Reef Scientifico	2	qup	Scarus vetula	28	i	-5.0162	3.1109	395.061	Scaridae
2011	Reef Scientifico	2	qup	Scarus vetula	31	i	-5.0162	3.1109	542.222	Scaridae
2011	Reef Scientifico	2	qup	Scarus vetula	35	t	-5.0162	3.1109	790.936	Scaridae
2011	Reef Scientifico	2	rdp	Sparisoma aurofrenatum	10	j	-4.0781	2.7438	25.6744	Scaridae
2011	Reef Scientifico	2	stop	Sparisoma viride	28	i	-4.4317	2.9051	475.925	Scaridae
2011	Reef Scientifico	2	stop	Sparisoma viride	32	t	-4.4317	2.9051	701.473	Scaridae
2011	Reef Scientifico	3	blt	Acanthurus coeruleus	19		-2.8242	2.2638	215.994	Acanthuridae
2011	Reef Scientifico	3	blt	Acanthurus coeruleus	19		-2.8242	2.2638	215.994	Acanthuridae
2011	Reef Scientifico	3	blt	Acanthurus coeruleus	20		-2.8242	2.2638	242.589	Acanthuridae
2011	Reef Scientifico	3	ytd	Microspathodon chrysurus	12		-4.7033	3.0825	50.7898	Pomacentridae
2011	Reef Scientifico	3	prp	Scarus taeniopterus	12	i	-3.2257	2.3852	54.1456	Scaridae
2011	Reef Scientifico	3	prp	Scarus taeniopterus	20	i	-3.2257	2.3852	183.112	Scaridae
2011	Reef Scientifico	3	prp	Scarus taeniopterus	22	i	-3.2257	2.3852	229.851	Scaridae
2011	Reef Scientifico	3	prp	Scarus taeniopterus	22	i	-3.2257	2.3852	229.851	Scaridae
2011	Reef Scientifico	3	prp	Scarus taeniopterus	23	i	-3.2257	2.3852	255.56	Scaridae
2011	Reef Scientifico	3	prp	Scarus taeniopterus	12	j	-3.2257	2.3852	54.1456	Scaridae
2011	Reef Scientifico	3	qup	Scarus vetula	30	i	-5.0162	3.1109	489.64	Scaridae
2011	Reef Scientifico	3	qup	Scarus vetula	28	t	-5.0162	3.1109	395.061	Scaridae
2011	Reef Scientifico	3	stop	Sparisoma viride	30	i	-4.4317	2.9051	581.547	Scaridae
2011	Reef Scientifico	3	stop	Sparisoma viride	30	i	-4.4317	2.9051	581.547	Scaridae
2011	Reef Scientifico	3	stop	Sparisoma viride	32	t	-4.4317	2.9051	701.473	Scaridae
2011	Reef Scientifico	4	blt	Acanthurus coeruleus	18		-2.8242	2.2638	191.111	Acanthuridae
2011	Reef Scientifico	4	blt	Acanthurus coeruleus	18		-2.8242	2.2638	191.111	Acanthuridae
2011	Reef Scientifico	4	ytd	Microspathodon chrysurus	12		-4.7033	3.0825	50.7898	Pomacentridae
2011	Reef Scientifico	4	prp	Scarus taeniopterus	20	i	-3.2257	2.3852	183.112	Scaridae
2011	Reef Scientifico	4	prp	Scarus taeniopterus	24	t	-3.2257	2.3852	282.865	Scaridae
2011	Reef Scientifico	4	prp	Scarus taeniopterus	25	t	-3.2257	2.3852	311.793	Scaridae
2011	Reef Scientifico	4	qup	Scarus vetula	28	i	-5.0162	3.1109	395.061	Scaridae
2011	Reef Scientifico	4	qup	Scarus vetula	34	t	-5.0162	3.1109	722.733	Scaridae
2011	Reef Scientifico	4	stop	Sparisoma viride	30	i	-4.4317	2.9051	581.547	Scaridae
2011	Reef Scientifico	5	blt	Acanthurus coeruleus	17		-2.8242	2.2638	167.915	Acanthuridae
2011	Reef Scientifico	5	blt	Acanthurus coeruleus	18		-2.8242	2.2638	191.111	Acanthuridae
2011	Reef Scientifico	5	blt	Acanthurus coeruleus	18		-2.8242	2.2638	191.111	Acanthuridae
2011	Reef Scientifico	5	blt	Acanthurus coeruleus	20		-2.8242	2.2638	242.589	Acanthuridae
2011	Reef Scientifico	5	prp	Scarus taeniopterus	22	i	-3.2257	2.3852	229.851	Scaridae
2011	Reef Scientifico	5	prp	Scarus taeniopterus	24	t	-3.2257	2.3852	282.865	Scaridae
2011	Reef Scientifico	5	qup	Scarus vetula	35	t	-5.0162	3.1109	790.936	Scaridae
2011	Reef Scientifico	5	stop	Sparisoma viride	32	t	-4.4317	2.9051	701.473	Scaridae
2011	Reef Scientifico	5	stop	Sparisoma viride	33	t	-4.4317	2.9051	767.07	Scaridae
2011	Reef Scientifico	6	ocs	Acanthurus bahianus	18		-4.6005	2.9752	128.643	Acanthuridae
2011	Reef Scientifico	6	ocs	Acanthurus bahianus	18		-4.6005	2.9752	128.643	Acanthuridae
2011	Reef Scientifico	6	blt	Acanthurus coeruleus	17		-2.8242	2.2638	167.915	Acanthuridae
2011	Reef Scientifico	6	blt	Acanthurus coeruleus	19		-2.8242	2.2638	215.994	Acanthuridae
2011	Reef Scientifico	6	prp	Scarus taeniopterus	19	i	-3.2257	2.3852	162.025	Scaridae
2011	Reef Scientifico	6	prp	Scarus taeniopterus	7	j	-3.2257	2.3852	14.9702	Scaridae
2011	Reef Scientifico	6	prp	Scarus taeniopterus	22	t	-3.2257	2.3852	229.851	Scaridae
2011	Reef Scientifico	6	qup	Scarus vetula	29	i	-5.0162	3.1109	440.63	Scaridae
2011	Reef Scientifico	6	stop	Sparisoma viride	30	i	-4.4317	2.9051	581.547	Scaridae
2011	Reef Scientifico	6	stop	Sparisoma viride	32	t	-4.4317	2.9051	701.473	Scaridae
2011	Reef Scientifico	6	stop	Sparisoma viride	32	t	-4.4317	2.9051	701.473	Scaridae
2011	Reef Scientifico	7	ocs	Acanthurus bahianus	20		-4.6005	2.9752	176.005	Acanthuridae
2011	Reef Scientifico	7	dcf	Acanthurus chirurgus	20		-2.4262	2.0768	225.206	Acanthuridae
2011	Reef Scientifico	7	dcf	Acanthurus chirurgus	20		-2.4262	2.0768	225.206	Acanthuridae
2011	Reef Scientifico	7	dcf	Acanthurus chirurgus	22		-2.4262	2.0768	274.501	Acanthuridae
2011	Reef Scientifico	7	blt	Acanthurus coeruleus	18		-2.8242	2.2638	191.111	Acanthuridae
2011	Reef Scientifico	7	blt	Acanthurus coeruleus	20		-2.8242	2.2638	242.589	Acanthuridae
2011	Reef Scientifico	7	blt	Acanthurus coeruleus	20		-2.8242	2.2638	242.589	Acanthuridae
2011	Reef Scientifico	7	blt	Acanthurus coeruleus	22		-2.8242	2.2638	301.007	Acanthuridae
2011	Reef Scientifico	7	prp	Scarus taeniopterus	12	i	-3.2257	2.3852	54.1456	Scaridae
2011	Reef Scientifico	7	prp	Scarus taeniopterus	10	j	-3.2257	2.3852	35.051	Scaridae
2011	Reef Scientifico	7	prp	Scarus taeniopterus	11	j	-3.2257	2.3852	43.9977	Scaridae
2011	Reef Scientifico	7	prp	Scarus taeniopterus	28	t	-3.2257	2.3852	408.565	Scaridae
2011	Reef Scientifico	7	stop	Sparisoma viride	30	i	-4.4317	2.9051	581.547	Scaridae
2011	Reef Scientifico	7	stop	Sparisoma viride	28	t	-4.4317	2.9051	475.925	Scaridae
2011	Reef Scientifico	8	ocs	Acanthurus bahianus	15		-4.6005	2.9752	74.7837	Acanthuridae
2011	Reef Scientifico	8	dcf	Acanthurus chirurgus	18		-2.4262	2.0768	180.946	Acanthuridae
2011	Reef Scientifico	8	dcf	Acanthurus chirurgus	22		-2.4262	2.0768	274.501	Acanthuridae
2011	Reef Scientifico	8	dcf	Acanthurus chirurgus	22		-2.4262	2.0768	274.501	Acanthuridae
2011	Reef Scientifico	8	dcf	Acanthurus chirurgus	22		-2.4262	2.0768	274.501	Acanthuridae
2011	Reef Scientifico	8	blt	Acanthurus coeruleus	15		-2.8242	2.2638	126.484	Acanthuridae
2011	Reef Scientifico	8	blt	Acanthurus coeruleus	16		-2.8242	2.2638	146.382	Acanthuridae
2011	Reef Scientifico	8	blt	Acanthurus coeruleus	18		-2.8242	2.2638	191.111	Acanthuridae
2011	Reef Scientifico	8	ytd	Microspathodon chrysurus	15		-4.7033	3.0825	101.042	Pomacentridae
2011	Reef Scientifico	8	prp	Scarus taeniopterus	19	i	-3.2257	2.3852	162.025	Scaridae
2011	Reef Scientifico	8	prp	Scarus taeniopterus	20	i	-3.2257	2.3852	183.112	Scaridae
2011	Reef Scientifico	8	prp	Scarus taeniopterus	25	t	-3.2257	2.3852	311.793	Scaridae
2011	Reef Scientifico	8	qup	Scarus vetula	30	i	-5.0162	3.1109	489.64	Scaridae
2011	Reef Scientifico	8	stop	Sparisoma viride	20	i	-4.4317	2.9051	179.07	Scaridae
2011	Reef Scientifico	8	stop	Sparisoma viride	22	i	-4.4317	2.9051	236.196	Scaridae
2011	Reef Scientifico	8	stop	Sparisoma viride	30	i	-4.4317	2.9051	581.547	Scaridae
2011	Reef Scientifico	8	stop	Sparisoma viride	32	t	-4.4317	2.9051	701.473	Scaridae
2013	Bachelor's Beach	1	ocs	Acanthurus bahianus	18		-4.6005	2.9752	128.643	Acanthuridae
2013	Bachelor's Beach	1	blt	Acanthurus coeruleus	15		-2.8242	2.2638	126.484	Acanthuridae
2013	Bachelor's Beach	1	blt	Acanthurus coeruleus	16		-2.8242	2.2638	146.382	Acanthuridae
2013	Bachelor's Beach	1	blt	Acanthurus coeruleus	19		-2.8242	2.2638	215.994	Acanthuridae
2013	Bachelor's Beach	1	blt	Acanthurus coeruleus	19		-2.8242	2.2638	215.994	Acanthuridae
2013	Bachelor's Beach	1	blt	Acanthurus coeruleus	20		-2.8242	2.2638	242.589	Acanthuridae
2013	Bachelor's Beach	1	prp	Scarus taeniopterus	18	i	-3.2257	2.3852	142.422	Scaridae
2013	Bachelor's Beach	1	prp	Scarus taeniopterus	20	i	-3.2257	2.3852	183.112	Scaridae
2013	Bachelor's Beach	1	prp	Scarus taeniopterus	12	j	-3.2257	2.3852	54.1456	Scaridae
2013	Bachelor's Beach	1	prp	Scarus taeniopterus	23	t	-3.2257	2.3852	255.56	Scaridae
2013	Bachelor's Beach	1	prp	Scarus taeniopterus	23	t	-3.2257	2.3852	255.56	Scaridae
2013	Bachelor's Beach	1	prp	Scarus taeniopterus	10		-3.2257	2.3852	35.051	Scaridae
2013	Bachelor's Beach	1	qup	Scarus vetula	23	i	-5.0162	3.1109	214.239	Scaridae
2013	Bachelor's Beach	1	qup	Scarus vetula	25	i	-5.0162	3.1109	277.684	Scaridae
2013	Bachelor's Beach	1	qup	Scarus vetula	30	t	-5.0162	3.1109	489.64	Scaridae
2013	Bachelor's Beach	1	qup	Scarus vetula	35	t	-5.0162	3.1109	790.936	Scaridae
2013	Bachelor's Beach	1	stop	Sparisoma viride	23	i	-4.4317	2.9051	268.754	Scaridae
2013	Bachelor's Beach	1	stop	Sparisoma viride	32	t	-4.4317	2.9051	701.473	Scaridae
2013	Bachelor's Beach	2	ocs	Acanthurus bahianus	15		-4.6005	2.9752	74.7837	Acanthuridae
2013	Bachelor's Beach	2	ocs	Acanthurus bahianus	15		-4.6005	2.9752	74.7837	Acanthuridae
2013	Bachelor's Beach	2	ocs	Acanthurus bahianus	17		-4.6005	2.9752	108.525	Acanthuridae
2013	Bachelor's Beach	2	ocs	Acanthurus bahianus	19		-4.6005	2.9752	151.094	Acanthuridae
2013	Bachelor's Beach	2	ocs	Acanthurus bahianus	20		-4.6005	2.9752	176.005	Acanthuridae
2013	Bachelor's Beach	2	ytd	Microspathodon chrysurus	12		-4.7033	3.0825	50.7898	Pomacentridae
2013	Bachelor's Beach	2	prp	Scarus taeniopterus	13	i	-3.2257	2.3852	65.5357	Scaridae
2013	Bachelor's Beach	2	prp	Scarus taeniopterus	15	i	-3.2257	2.3852	92.1962	Scaridae
2013	Bachelor's Beach	2	qup	Scarus vetula	30	i	-5.0162	3.1109	489.64	Scaridae
2013	Bachelor's Beach	2	stop	Sparisoma viride	25	i	-4.4317	2.9051	342.417	Scaridae
2013	Bachelor's Beach	2	stop	Sparisoma viride	25	i	-4.4317	2.9051	342.417	Scaridae
2013	Bachelor's Beach	2	stop	Sparisoma viride	34	t	-4.4317	2.9051	836.564	Scaridae
2013	Bachelor's Beach	3	dcf	Acanthurus chirurgus	22		-2.4262	2.0768	274.501	Acanthuridae
2013	Bachelor's Beach	3	dcf	Acanthurus chirurgus	22		-2.4262	2.0768	274.501	Acanthuridae
2013	Bachelor's Beach	3	dcf	Acanthurus chirurgus	22		-2.4262	2.0768	274.501	Acanthuridae
2013	Bachelor's Beach	3	blt	Acanthurus coeruleus	17		-2.8242	2.2638	167.915	Acanthuridae
2013	Bachelor's Beach	3	blt	Acanthurus coeruleus	18		-2.8242	2.2638	191.111	Acanthuridae
2013	Bachelor's Beach	3	blt	Acanthurus coeruleus	19		-2.8242	2.2638	215.994	Acanthuridae
2013	Bachelor's Beach	3	blt	Acanthurus coeruleus	20		-2.8242	2.2638	242.589	Acanthuridae
2013	Bachelor's Beach	3	blt	Acanthurus coeruleus	20		-2.8242	2.2638	242.589	Acanthuridae
2013	Bachelor's Beach	3	blt	Acanthurus coeruleus	20		-2.8242	2.2638	242.589	Acanthuridae
2013	Bachelor's Beach	3	blt	Acanthurus coeruleus	20		-2.8242	2.2638	242.589	Acanthuridae
2013	Bachelor's Beach	3	blt	Acanthurus coeruleus	20		-2.8242	2.2638	242.589	Acanthuridae
2013	Bachelor's Beach	3	blt	Acanthurus coeruleus	20		-2.8242	2.2638	242.589	Acanthuridae
2013	Bachelor's Beach	3	blt	Acanthurus coeruleus	20		-2.8242	2.2638	242.589	Acanthuridae
2013	Bachelor's Beach	3	blt	Acanthurus coeruleus	20		-2.8242	2.2638	242.589	Acanthuridae
2013	Bachelor's Beach	3	blt	Acanthurus coeruleus	20		-2.8242	2.2638	242.589	Acanthuridae
2013	Bachelor's Beach	3	blt	Acanthurus coeruleus	20		-2.8242	2.2638	242.589	Acanthuridae
2013	Bachelor's Beach	3	blt	Acanthurus coeruleus	20		-2.8242	2.2638	242.589	Acanthuridae
2013	Bachelor's Beach	3	blt	Acanthurus coeruleus	20		-2.8242	2.2638	242.589	Acanthuridae
2013	Bachelor's Beach	3	blt	Acanthurus coeruleus	20		-2.8242	2.2638	242.589	Acanthuridae
2013	Bachelor's Beach	3	blt	Acanthurus coeruleus	20		-2.8242	2.2638	242.589	Acanthuridae
2013	Bachelor's Beach	3	blt	Acanthurus coeruleus	20		-2.8242	2.2638	242.589	Acanthuridae
2013	Bachelor's Beach	3	blt	Acanthurus coeruleus	20		-2.8242	2.2638	242.589	Acanthuridae
2013	Bachelor's Beach	3	blt	Acanthurus coeruleus	20		-2.8242	2.2638	242.589	Acanthuridae
2013	Bachelor's Beach	3	blt	Acanthurus coeruleus	20		-2.8242	2.2638	242.589	Acanthuridae
2013	Bachelor's Beach	3	blt	Acanthurus coeruleus	20		-2.8242	2.2638	242.589	Acanthuridae
2013	Bachelor's Beach	3	blt	Acanthurus coeruleus	20		-2.8242	2.2638	242.589	Acanthuridae
2013	Bachelor's Beach	3	blt	Acanthurus coeruleus	20		-2.8242	2.2638	242.589	Acanthuridae
2013	Bachelor's Beach	3	blt	Acanthurus coeruleus	20		-2.8242	2.2638	242.589	Acanthuridae
2013	Bachelor's Beach	3	blt	Acanthurus coeruleus	20		-2.8242	2.2638	242.589	Acanthuridae
2013	Bachelor's Beach	3	blt	Acanthurus coeruleus	20		-2.8242	2.2638	242.589	Acanthuridae
2013	Bachelor's Beach	3	blt	Acanthurus coeruleus	20		-2.8242	2.2638	242.589	Acanthuridae
2013	Bachelor's Beach	3	blt	Acanthurus coeruleus	20		-2.8242	2.2638	242.589	Acanthuridae
2013	Bachelor's Beach	3	blt	Acanthurus coeruleus	20		-2.8242	2.2638	242.589	Acanthuridae
2013	Bachelor's Beach	3	blt	Acanthurus coeruleus	20		-2.8242	2.2638	242.589	Acanthuridae
2013	Bachelor's Beach	3	blt	Acanthurus coeruleus	20		-2.8242	2.2638	242.589	Acanthuridae
2013	Bachelor's Beach	3	blt	Acanthurus coeruleus	20		-2.8242	2.2638	242.589	Acanthuridae
2013	Bachelor's Beach	3	blt	Acanthurus coeruleus	20		-2.8242	2.2638	242.589	Acanthuridae
2013	Bachelor's Beach	3	blt	Acanthurus coeruleus	20		-2.8242	2.2638	242.589	Acanthuridae
2013	Bachelor's Beach	3	blt	Acanthurus coeruleus	20		-2.8242	2.2638	242.589	Acanthuridae
2013	Bachelor's Beach	3	blt	Acanthurus coeruleus	20		-2.8242	2.2638	242.589	Acanthuridae
2013	Bachelor's Beach	3	blt	Acanthurus coeruleus	20		-2.8242	2.2638	242.589	Acanthuridae
2013	Bachelor's Beach	3	blt	Acanthurus coeruleus	20		-2.8242	2.2638	242.589	Acanthuridae
2013	Bachelor's Beach	3	blt	Acanthurus coeruleus	20		-2.8242	2.2638	242.589	Acanthuridae
2013	Bachelor's Beach	3	blt	Acanthurus coeruleus	20		-2.8242	2.2638	242.589	Acanthuridae
2013	Bachelor's Beach	3	blt	Acanthurus coeruleus	20		-2.8242	2.2638	242.589	Acanthuridae
2013	Bachelor's Beach	3	blt	Acanthurus coeruleus	20		-2.8242	2.2638	242.589	Acanthuridae
2013	Bachelor's Beach	3	blt	Acanthurus coeruleus	20		-2.8242	2.2638	242.589	Acanthuridae
2013	Bachelor's Beach	3	ytd	Microspathodon chrysurus	12		-4.7033	3.0825	50.7898	Pomacentridae
2013	Bachelor's Beach	3	prp	Scarus taeniopterus	21	i	-3.2257	2.3852	205.711	Scaridae
2013	Bachelor's Beach	3	prp	Scarus taeniopterus	22	i	-3.2257	2.3852	229.851	Scaridae
2013	Bachelor's Beach	3	prp	Scarus taeniopterus	23	t	-3.2257	2.3852	255.56	Scaridae
2013	Bachelor's Beach	3	prp	Scarus taeniopterus	25	t	-3.2257	2.3852	311.793	Scaridae
2013	Bachelor's Beach	3	qup	Scarus vetula	25	i	-5.0162	3.1109	277.684	Scaridae
2013	Bachelor's Beach	3	qup	Scarus vetula	29	i	-5.0162	3.1109	440.63	Scaridae
2013	Bachelor's Beach	3	qup	Scarus vetula	33	t	-5.0162	3.1109	658.635	Scaridae
2013	Bachelor's Beach	3	rdp	Sparisoma aurofrenatum	22	t	-4.0781	2.7438	223.377	Scaridae
2013	Bachelor's Beach	3	stop	Sparisoma viride	28	i	-4.4317	2.9051	475.925	Scaridae
2013	Bachelor's Beach	4	dcf	Acanthurus chirurgus	19		-2.4262	2.0768	202.449	Acanthuridae
2013	Bachelor's Beach	4	blt	Acanthurus coeruleus	17		-2.8242	2.2638	167.915	Acanthuridae
2013	Bachelor's Beach	4	ytd	Microspathodon chrysurus	18		-4.7033	3.0825	177.246	Pomacentridae
2013	Bachelor's Beach	4	strp	Scarus iseri	22	t	-4.8887	3.0548	184.898	Scaridae
2013	Bachelor's Beach	4	strp	Scarus iseri	25	t	-4.8887	3.0548	273.229	Scaridae
2013	Bachelor's Beach	4	prp	Scarus taeniopterus	12	i	-3.2257	2.3852	54.1456	Scaridae
2013	Bachelor's Beach	4	prp	Scarus taeniopterus	15	i	-3.2257	2.3852	92.1962	Scaridae
2013	Bachelor's Beach	4	prp	Scarus taeniopterus	17	i	-3.2257	2.3852	124.27	Scaridae
2013	Bachelor's Beach	4	prp	Scarus taeniopterus	20	i	-3.2257	2.3852	183.112	Scaridae
2013	Bachelor's Beach	4	qup	Scarus vetula	25	i	-5.0162	3.1109	277.684	Scaridae
2013	Bachelor's Beach	4	qup	Scarus vetula	30	i	-5.0162	3.1109	489.64	Scaridae
2013	Bachelor's Beach	4	qup	Scarus vetula	35	t	-5.0162	3.1109	790.936	Scaridae
2013	Bachelor's Beach	4	stop	Sparisoma viride	20	i	-4.4317	2.9051	179.07	Scaridae
2013	Bachelor's Beach	4	stop	Sparisoma viride	35	t	-4.4317	2.9051	910.064	Scaridae
2013	Bachelor's Beach	5	ytd	Microspathodon chrysurus	12		-4.7033	3.0825	50.7898	Pomacentridae
2013	Bachelor's Beach	5	prp	Scarus taeniopterus	10	i	-3.2257	2.3852	35.051	Scaridae
2013	Bachelor's Beach	5	prp	Scarus taeniopterus	17	i	-3.2257	2.3852	124.27	Scaridae
2013	Bachelor's Beach	5	prp	Scarus taeniopterus	18	i	-3.2257	2.3852	142.422	Scaridae
2013	Bachelor's Beach	5	prp	Scarus taeniopterus	19	i	-3.2257	2.3852	162.025	Scaridae
2013	Bachelor's Beach	5	prp	Scarus taeniopterus	20	i	-3.2257	2.3852	183.112	Scaridae
2013	Bachelor's Beach	5	qup	Scarus vetula	23	i	-5.0162	3.1109	214.239	Scaridae
2013	Bachelor's Beach	5	qup	Scarus vetula	30	i	-5.0162	3.1109	489.64	Scaridae
2013	Bachelor's Beach	5	qup	Scarus vetula	33	t	-5.0162	3.1109	658.635	Scaridae
2013	Bachelor's Beach	5	rdp	Sparisoma aurofrenatum	23	t	-4.0781	2.7438	252.353	Scaridae
2013	Bachelor's Beach	6	ocs	Acanthurus bahianus	15		-4.6005	2.9752	74.7837	Acanthuridae
2013	Bachelor's Beach	6	ocs	Acanthurus bahianus	17		-4.6005	2.9752	108.525	Acanthuridae
2013	Bachelor's Beach	6	blt	Acanthurus coeruleus	20		-2.8242	2.2638	242.589	Acanthuridae
2013	Bachelor's Beach	6	blt	Acanthurus coeruleus	22		-2.8242	2.2638	301.007	Acanthuridae
2013	Bachelor's Beach	6	ytd	Microspathodon chrysurus	12		-4.7033	3.0825	50.7898	Pomacentridae
2013	Bachelor's Beach	6	strp	Scarus iseri	23	t	-4.8887	3.0548	211.79	Scaridae
2013	Bachelor's Beach	6	prp	Scarus taeniopterus	15	i	-3.2257	2.3852	92.1962	Scaridae
2013	Bachelor's Beach	6	prp	Scarus taeniopterus	20	i	-3.2257	2.3852	183.112	Scaridae
2013	Bachelor's Beach	6	prp	Scarus taeniopterus	20	i	-3.2257	2.3852	183.112	Scaridae
2013	Bachelor's Beach	6	prp	Scarus taeniopterus	20	i	-3.2257	2.3852	183.112	Scaridae
2013	Bachelor's Beach	6	qup	Scarus vetula	28	i	-5.0162	3.1109	395.061	Scaridae
2013	Bachelor's Beach	6	qup	Scarus vetula	30	t	-5.0162	3.1109	489.64	Scaridae
2013	Bachelor's Beach	6	qup	Scarus vetula	33	t	-5.0162	3.1109	658.635	Scaridae
2013	Bachelor's Beach	6	qup	Scarus vetula	35	t	-5.0162	3.1109	790.936	Scaridae
2013	Bachelor's Beach	6	rdp	Sparisoma aurofrenatum	20	t	-4.0781	2.7438	171.975	Scaridae
2013	Bachelor's Beach	6	rdp	Sparisoma aurofrenatum	23	t	-4.0781	2.7438	252.353	Scaridae
2013	Bachelor's Beach	6	stop	Sparisoma viride	23	i	-4.4317	2.9051	268.754	Scaridae
2013	Bachelor's Beach	6	stop	Sparisoma viride	25	i	-4.4317	2.9051	342.417	Scaridae
2013	Bachelor's Beach	6	stop	Sparisoma viride	32	t	-4.4317	2.9051	701.473	Scaridae
2013	Bachelor's Beach	7	ocs	Acanthurus bahianus	15		-4.6005	2.9752	74.7837	Acanthuridae
2013	Bachelor's Beach	7	ocs	Acanthurus bahianus	20		-4.6005	2.9752	176.005	Acanthuridae
2013	Bachelor's Beach	7	ocs	Acanthurus bahianus	20		-4.6005	2.9752	176.005	Acanthuridae
2013	Bachelor's Beach	7	blt	Acanthurus coeruleus	12		-2.8242	2.2638	76.3221	Acanthuridae
2013	Bachelor's Beach	7	blt	Acanthurus coeruleus	15		-2.8242	2.2638	126.484	Acanthuridae
2013	Bachelor's Beach	7	blt	Acanthurus coeruleus	19		-2.8242	2.2638	215.994	Acanthuridae
2013	Bachelor's Beach	7	ytd	Microspathodon chrysurus	13		-4.7033	3.0825	65.0025	Pomacentridae
2013	Bachelor's Beach	7	strp	Scarus iseri	23	t	-4.8887	3.0548	211.79	Scaridae
2013	Bachelor's Beach	7	strp	Scarus iseri	23	t	-4.8887	3.0548	211.79	Scaridae
2013	Bachelor's Beach	7	prp	Scarus taeniopterus	15	i	-3.2257	2.3852	92.1962	Scaridae
2013	Bachelor's Beach	7	prp	Scarus taeniopterus	15	i	-3.2257	2.3852	92.1962	Scaridae
2013	Bachelor's Beach	7	prp	Scarus taeniopterus	19	i	-3.2257	2.3852	162.025	Scaridae
2013	Bachelor's Beach	7	prp	Scarus taeniopterus	20	i	-3.2257	2.3852	183.112	Scaridae
2013	Bachelor's Beach	7	prp	Scarus taeniopterus	21	i	-3.2257	2.3852	205.711	Scaridae
2013	Bachelor's Beach	7	prp	Scarus taeniopterus	22	i	-3.2257	2.3852	229.851	Scaridae
2013	Bachelor's Beach	7	prp	Scarus taeniopterus	23	t	-3.2257	2.3852	255.56	Scaridae
2013	Bachelor's Beach	7	qup	Scarus vetula	23	i	-5.0162	3.1109	214.239	Scaridae
2013	Bachelor's Beach	7	qup	Scarus vetula	25	i	-5.0162	3.1109	277.684	Scaridae
2013	Bachelor's Beach	7	qup	Scarus vetula	30	i	-5.0162	3.1109	489.64	Scaridae
2013	Bachelor's Beach	7	qup	Scarus vetula	35	t	-5.0162	3.1109	790.936	Scaridae
2013	Bachelor's Beach	7	rdp	Sparisoma aurofrenatum	20	t	-4.0781	2.7438	171.975	Scaridae
2013	Bachelor's Beach	7	stop	Sparisoma viride	24	i	-4.4317	2.9051	304.125	Scaridae
2013	Bachelor's Beach	7	stop	Sparisoma viride	25	i	-4.4317	2.9051	342.417	Scaridae
2013	Bachelor's Beach	7	stop	Sparisoma viride	25	i	-4.4317	2.9051	342.417	Scaridae
2013	Bachelor's Beach	8	ocs	Acanthurus bahianus	12		-4.6005	2.9752	38.5017	Acanthuridae
2013	Bachelor's Beach	8	ocs	Acanthurus bahianus	13		-4.6005	2.9752	48.8545	Acanthuridae
2013	Bachelor's Beach	8	ocs	Acanthurus bahianus	15		-4.6005	2.9752	74.7837	Acanthuridae
2013	Bachelor's Beach	8	ocs	Acanthurus bahianus	18		-4.6005	2.9752	128.643	Acanthuridae
2013	Bachelor's Beach	8	blt	Acanthurus coeruleus	18		-2.8242	2.2638	191.111	Acanthuridae
2013	Bachelor's Beach	8	ytd	Microspathodon chrysurus	15		-4.7033	3.0825	101.042	Pomacentridae
2013	Bachelor's Beach	8	strp	Scarus iseri	23	t	-4.8887	3.0548	211.79	Scaridae
2013	Bachelor's Beach	8	prp	Scarus taeniopterus	10	i	-3.2257	2.3852	35.051	Scaridae
2013	Bachelor's Beach	8	prp	Scarus taeniopterus	12	i	-3.2257	2.3852	54.1456	Scaridae
2013	Bachelor's Beach	8	prp	Scarus taeniopterus	15	i	-3.2257	2.3852	92.1962	Scaridae
2013	Bachelor's Beach	8	prp	Scarus taeniopterus	20	i	-3.2257	2.3852	183.112	Scaridae
2013	Bachelor's Beach	8	prp	Scarus taeniopterus	23	t	-3.2257	2.3852	255.56	Scaridae
2013	Bachelor's Beach	8	prp	Scarus taeniopterus	23	t	-3.2257	2.3852	255.56	Scaridae
2013	Bachelor's Beach	8	qup	Scarus vetula	25	i	-5.0162	3.1109	277.684	Scaridae
2013	Bachelor's Beach	8	qup	Scarus vetula	34	t	-5.0162	3.1109	722.733	Scaridae
2013	Bachelor's Beach	8	stop	Sparisoma viride	25	i	-4.4317	2.9051	342.417	Scaridae
2013	Bachelor's Beach	8	stop	Sparisoma viride	28	i	-4.4317	2.9051	475.925	Scaridae
2013	Bachelor's Beach	8	stop	Sparisoma viride	30	i	-4.4317	2.9051	581.547	Scaridae
2013	Bachelor's Beach	9	blt	Acanthurus coeruleus	15		-2.8242	2.2638	126.484	Acanthuridae
2013	Bachelor's Beach	9	blt	Acanthurus coeruleus	17		-2.8242	2.2638	167.915	Acanthuridae
2013	Bachelor's Beach	9	blt	Acanthurus coeruleus	20		-2.8242	2.2638	242.589	Acanthuridae
2013	Bachelor's Beach	9	ytd	Microspathodon chrysurus	12		-4.7033	3.0825	50.7898	Pomacentridae
2013	Bachelor's Beach	9	ytd	Microspathodon chrysurus	15		-4.7033	3.0825	101.042	Pomacentridae
2013	Bachelor's Beach	9	prp	Scarus taeniopterus	12	i	-3.2257	2.3852	54.1456	Scaridae
2013	Bachelor's Beach	9	prp	Scarus taeniopterus	15	i	-3.2257	2.3852	92.1962	Scaridae
2013	Bachelor's Beach	9	prp	Scarus taeniopterus	17	i	-3.2257	2.3852	124.27	Scaridae
2013	Bachelor's Beach	9	prp	Scarus taeniopterus	20	i	-3.2257	2.3852	183.112	Scaridae
2013	Bachelor's Beach	9	qup	Scarus vetula	28	i	-5.0162	3.1109	395.061	Scaridae
2013	Bachelor's Beach	9	qup	Scarus vetula	28	i	-5.0162	3.1109	395.061	Scaridae
2013	Bachelor's Beach	9	qup	Scarus vetula	30	i	-5.0162	3.1109	489.64	Scaridae
2013	Bachelor's Beach	9	qup	Scarus vetula	35	t	-5.0162	3.1109	790.936	Scaridae
2013	Bachelor's Beach	9	rdp	Sparisoma aurofrenatum	15	i	-4.0781	2.7438	78.1015	Scaridae
2013	Bachelor's Beach	9	rdp	Sparisoma aurofrenatum	17	t	-4.0781	2.7438	110.105	Scaridae
2013	Bachelor's Beach	9	rdp	Sparisoma aurofrenatum	20	t	-4.0781	2.7438	171.975	Scaridae
2013	Bachelor's Beach	9	stop	Sparisoma viride	28	i	-4.4317	2.9051	475.925	Scaridae
2013	Bachelor's Beach	9	stop	Sparisoma viride	30	i	-4.4317	2.9051	581.547	Scaridae
2013	Bachelor's Beach	9	stop	Sparisoma viride	32	t	-4.4317	2.9051	701.473	Scaridae
2013	Bachelor's Beach	9	stop	Sparisoma viride	32	t	-4.4317	2.9051	701.473	Scaridae
2013	Barcadera	1	dcf	Acanthurus chirurgus	17		-2.4262	2.0768	160.693	Acanthuridae
2013	Barcadera	1	prp	Scarus taeniopterus	13	i	-3.2257	2.3852	65.5357	Scaridae
2013	Barcadera	1	prp	Scarus taeniopterus	15	i	-3.2257	2.3852	92.1962	Scaridae
2013	Barcadera	1	prp	Scarus taeniopterus	23	t	-3.2257	2.3852	255.56	Scaridae
2013	Barcadera	1	prp	Scarus taeniopterus	24	t	-3.2257	2.3852	282.865	Scaridae
2013	Barcadera	1	qup	Scarus vetula	35	t	-5.0162	3.1109	790.936	Scaridae
2013	Barcadera	1	rdp	Sparisoma aurofrenatum	22	t	-4.0781	2.7438	223.377	Scaridae
2013	Barcadera	1	stop	Sparisoma viride	28	i	-4.4317	2.9051	475.925	Scaridae
2013	Barcadera	1	stop	Sparisoma viride	29	i	-4.4317	2.9051	527.002	Scaridae
2013	Barcadera	2	prp	Scarus taeniopterus	20	i	-3.2257	2.3852	183.112	Scaridae
2013	Barcadera	2	qup	Scarus vetula	26	i	-5.0162	3.1109	313.719	Scaridae
2013	Barcadera	2	qup	Scarus vetula	35	t	-5.0162	3.1109	790.936	Scaridae
2013	Barcadera	2	rtp	Sparisoma chrysopterum	23	t	-3.0509	2.3192	266.943	Scaridae
2013	Barcadera	2	stop	Sparisoma viride	24	i	-4.4317	2.9051	304.125	Scaridae
2013	Barcadera	2	stop	Sparisoma viride	28	i	-4.4317	2.9051	475.925	Scaridae
2013	Barcadera	2	stop	Sparisoma viride	32	t	-4.4317	2.9051	701.473	Scaridae
2013	Barcadera	2	stop	Sparisoma viride	34	t	-4.4317	2.9051	836.564	Scaridae
2013	Barcadera	3	ytd	Microspathodon chrysurus	18		-4.7033	3.0825	177.246	Pomacentridae
2013	Barcadera	3	prp	Scarus taeniopterus	18	i	-3.2257	2.3852	142.422	Scaridae
2013	Barcadera	3	prp	Scarus taeniopterus	23	t	-3.2257	2.3852	255.56	Scaridae
2013	Barcadera	3	qup	Scarus vetula	30	i	-5.0162	3.1109	489.64	Scaridae
2013	Barcadera	3	qup	Scarus vetula	32	i	-5.0162	3.1109	598.51	Scaridae
2013	Barcadera	3	qup	Scarus vetula	34	t	-5.0162	3.1109	722.733	Scaridae
2013	Barcadera	3	qup	Scarus vetula	35	t	-5.0162	3.1109	790.936	Scaridae
2013	Barcadera	3	stop	Sparisoma viride	28	i	-4.4317	2.9051	475.925	Scaridae
2013	Barcadera	3	stop	Sparisoma viride	29	i	-4.4317	2.9051	527.002	Scaridae
2013	Barcadera	3	stop	Sparisoma viride	32	t	-4.4317	2.9051	701.473	Scaridae
2013	Barcadera	3	stop	Sparisoma viride	33	t	-4.4317	2.9051	767.07	Scaridae
2013	Barcadera	4	blt	Acanthurus coeruleus	19		-2.8242	2.2638	215.994	Acanthuridae
2013	Barcadera	4	blt	Acanthurus coeruleus	19		-2.8242	2.2638	215.994	Acanthuridae
2013	Barcadera	4	blt	Acanthurus coeruleus	20		-2.8242	2.2638	242.589	Acanthuridae
2013	Barcadera	4	ytd	Microspathodon chrysurus	13		-4.7033	3.0825	65.0025	Pomacentridae
2013	Barcadera	4	ytd	Microspathodon chrysurus	13		-4.7033	3.0825	65.0025	Pomacentridae
2013	Barcadera	4	prp	Scarus taeniopterus	15	i	-3.2257	2.3852	92.1962	Scaridae
2013	Barcadera	4	prp	Scarus taeniopterus	18	i	-3.2257	2.3852	142.422	Scaridae
2013	Barcadera	4	prp	Scarus taeniopterus	19	i	-3.2257	2.3852	162.025	Scaridae
2013	Barcadera	4	prp	Scarus taeniopterus	23	t	-3.2257	2.3852	255.56	Scaridae
2013	Barcadera	4	prp	Scarus taeniopterus	23	t	-3.2257	2.3852	255.56	Scaridae
2013	Barcadera	4	qup	Scarus vetula	28	i	-5.0162	3.1109	395.061	Scaridae
2013	Barcadera	4	qup	Scarus vetula	30	i	-5.0162	3.1109	489.64	Scaridae
2013	Barcadera	4	stop	Sparisoma viride	28	i	-4.4317	2.9051	475.925	Scaridae
2013	Barcadera	4	stop	Sparisoma viride	29	i	-4.4317	2.9051	527.002	Scaridae
2013	Barcadera	4	stop	Sparisoma viride	32	i	-4.4317	2.9051	701.473	Scaridae
2013	Barcadera	5	ocs	Acanthurus bahianus	20		-4.6005	2.9752	176.005	Acanthuridae
2013	Barcadera	5	ytd	Microspathodon chrysurus	13		-4.7033	3.0825	65.0025	Pomacentridae
2013	Barcadera	5	strp	Scarus iseri	24	t	-4.8887	3.0548	241.196	Scaridae
2013	Barcadera	5	prp	Scarus taeniopterus	10	i	-3.2257	2.3852	35.051	Scaridae
2013	Barcadera	5	prp	Scarus taeniopterus	11	i	-3.2257	2.3852	43.9977	Scaridae
2013	Barcadera	5	prp	Scarus taeniopterus	7	j	-3.2257	2.3852	14.9702	Scaridae
2013	Barcadera	5	prp	Scarus taeniopterus	23	t	-3.2257	2.3852	255.56	Scaridae
2013	Barcadera	5	prp	Scarus taeniopterus	23	t	-3.2257	2.3852	255.56	Scaridae
2013	Barcadera	5	qup	Scarus vetula	31	i	-5.0162	3.1109	542.222	Scaridae
2013	Barcadera	5	stop	Sparisoma viride	26	i	-4.4317	2.9051	383.742	Scaridae
2013	Barcadera	5	stop	Sparisoma viride	29	i	-4.4317	2.9051	527.002	Scaridae
2013	Barcadera	5	stop	Sparisoma viride	32	i	-4.4317	2.9051	701.473	Scaridae
2013	Barcadera	6	dcf	Acanthurus chirurgus	16		-2.4262	2.0768	141.683	Acanthuridae
2013	Barcadera	6	blt	Acanthurus coeruleus	16		-2.8242	2.2638	146.382	Acanthuridae
2013	Barcadera	6	prp	Scarus taeniopterus	23	t	-3.2257	2.3852	255.56	Scaridae
2013	Barcadera	6	qup	Scarus vetula	33	i	-5.0162	3.1109	658.635	Scaridae
2013	Barcadera	6	qup	Scarus vetula	34	t	-5.0162	3.1109	722.733	Scaridae
2013	Barcadera	6	qup	Scarus vetula	35	t	-5.0162	3.1109	790.936	Scaridae
2013	Barcadera	6	stop	Sparisoma viride	30	i	-4.4317	2.9051	581.547	Scaridae
2013	Barcadera	6	stop	Sparisoma viride	30	i	-4.4317	2.9051	581.547	Scaridae
2013	Barcadera	6	stop	Sparisoma viride	30	i	-4.4317	2.9051	581.547	Scaridae
2013	Barcadera	6	stop	Sparisoma viride	31	i	-4.4317	2.9051	639.668	Scaridae
2013	Barcadera	6	stop	Sparisoma viride	32	t	-4.4317	2.9051	701.473	Scaridae
2013	Barcadera	7	blt	Acanthurus coeruleus	15		-2.8242	2.2638	126.484	Acanthuridae
2013	Barcadera	7	blt	Acanthurus coeruleus	16		-2.8242	2.2638	146.382	Acanthuridae
2013	Barcadera	7	prp	Scarus taeniopterus	10	i	-3.2257	2.3852	35.051	Scaridae
2013	Barcadera	7	prp	Scarus taeniopterus	15	i	-3.2257	2.3852	92.1962	Scaridae
2013	Barcadera	7	prp	Scarus taeniopterus	23	t	-3.2257	2.3852	255.56	Scaridae
2013	Barcadera	7	prp	Scarus taeniopterus	23	t	-3.2257	2.3852	255.56	Scaridae
2013	Barcadera	7	qup	Scarus vetula	32	i	-5.0162	3.1109	598.51	Scaridae
2013	Barcadera	7	qup	Scarus vetula	30	t	-5.0162	3.1109	489.64	Scaridae
2013	Barcadera	7	qup	Scarus vetula	35	t	-5.0162	3.1109	790.936	Scaridae
2013	Barcadera	7	stop	Sparisoma viride	28	i	-4.4317	2.9051	475.925	Scaridae
2013	Barcadera	7	stop	Sparisoma viride	30	i	-4.4317	2.9051	581.547	Scaridae
2013	Barcadera	7	stop	Sparisoma viride	31	t	-4.4317	2.9051	639.668	Scaridae
2013	Barcadera	7	stop	Sparisoma viride	32	t	-4.4317	2.9051	701.473	Scaridae
2013	Barcadera	8	ytd	Microspathodon chrysurus	12		-4.7033	3.0825	50.7898	Pomacentridae
2013	Barcadera	8	prp	Scarus taeniopterus	18	i	-3.2257	2.3852	142.422	Scaridae
2013	Barcadera	8	prp	Scarus taeniopterus	19	i	-3.2257	2.3852	162.025	Scaridae
2013	Barcadera	8	prp	Scarus taeniopterus	19	i	-3.2257	2.3852	162.025	Scaridae
2013	Barcadera	8	prp	Scarus taeniopterus	23	t	-3.2257	2.3852	255.56	Scaridae
2013	Barcadera	8	prp	Scarus taeniopterus	24	t	-3.2257	2.3852	282.865	Scaridae
2013	Barcadera	8	qup	Scarus vetula	28	i	-5.0162	3.1109	395.061	Scaridae
2013	Barcadera	8	stop	Sparisoma viride	30	i	-4.4317	2.9051	581.547	Scaridae
2013	Barcadera	8	stop	Sparisoma viride	30	i	-4.4317	2.9051	581.547	Scaridae
2013	Barcadera	8	stop	Sparisoma viride	30	i	-4.4317	2.9051	581.547	Scaridae
2013	Barcadera	8	stop	Sparisoma viride	31	i	-4.4317	2.9051	639.668	Scaridae
2013	Barcadera	9	blt	Acanthurus coeruleus	19		-2.8242	2.2638	215.994	Acanthuridae
2013	Barcadera	9	strp	Scarus iseri	12	i	-4.8887	3.0548	29.0257	Scaridae
2013	Barcadera	9	strp	Scarus iseri	23	t	-4.8887	3.0548	211.79	Scaridae
2013	Barcadera	9	prp	Scarus taeniopterus	23	t	-3.2257	2.3852	255.56	Scaridae
2013	Barcadera	9	qup	Scarus vetula	28	i	-5.0162	3.1109	395.061	Scaridae
2013	Barcadera	9	qup	Scarus vetula	28	i	-5.0162	3.1109	395.061	Scaridae
2013	Barcadera	9	qup	Scarus vetula	32	i	-5.0162	3.1109	598.51	Scaridae
2013	Barcadera	9	qup	Scarus vetula	34	t	-5.0162	3.1109	722.733	Scaridae
2013	Barcadera	9	rdp	Sparisoma aurofrenatum	22	t	-4.0781	2.7438	223.377	Scaridae
2013	Barcadera	9	stop	Sparisoma viride	22	i	-4.4317	2.9051	236.196	Scaridae
2013	Barcadera	9	stop	Sparisoma viride	24	i	-4.4317	2.9051	304.125	Scaridae
2013	Barcadera	9	stop	Sparisoma viride	28	i	-4.4317	2.9051	475.925	Scaridae
2013	Barcadera	9	stop	Sparisoma viride	30	i	-4.4317	2.9051	581.547	Scaridae
2013	Barcadera	9	stop	Sparisoma viride	31	i	-4.4317	2.9051	639.668	Scaridae
2013	Calabas	1	ocs	Acanthurus bahianus	15		-4.6005	2.9752	74.7837	Acanthuridae
2013	Calabas	1	ocs	Acanthurus bahianus	18		-4.6005	2.9752	128.643	Acanthuridae
2013	Calabas	1	blt	Acanthurus coeruleus	18		-2.8242	2.2638	191.111	Acanthuridae
2013	Calabas	1	strp	Scarus iseri	14	i	-4.8887	3.0548	46.4828	Scaridae
2013	Calabas	1	prp	Scarus taeniopterus	21	i	-3.2257	2.3852	205.711	Scaridae
2013	Calabas	1	prp	Scarus taeniopterus	12	j	-3.2257	2.3852	54.1456	Scaridae
2013	Calabas	1	prp	Scarus taeniopterus	12	j	-3.2257	2.3852	54.1456	Scaridae
2013	Calabas	1	prp	Scarus taeniopterus	23	t	-3.2257	2.3852	255.56	Scaridae
2013	Calabas	1	prp	Scarus taeniopterus	23	t	-3.2257	2.3852	255.56	Scaridae
2013	Calabas	1	qup	Scarus vetula	28	i	-5.0162	3.1109	395.061	Scaridae
2013	Calabas	1	qup	Scarus vetula	35	t	-5.0162	3.1109	790.936	Scaridae
2013	Calabas	1	rdp	Sparisoma aurofrenatum	17	i	-4.0781	2.7438	110.105	Scaridae
2013	Calabas	1	rdp	Sparisoma aurofrenatum	20	i	-4.0781	2.7438	171.975	Scaridae
2013	Calabas	1	rdp	Sparisoma aurofrenatum	20	i	-4.0781	2.7438	171.975	Scaridae
2013	Calabas	1	stop	Sparisoma viride	25	i	-4.4317	2.9051	342.417	Scaridae
2013	Calabas	1	stop	Sparisoma viride	31	i	-4.4317	2.9051	639.668	Scaridae
2013	Calabas	1	stop	Sparisoma viride	32	t	-4.4317	2.9051	701.473	Scaridae
2013	Calabas	2	ocs	Acanthurus bahianus	19		-4.6005	2.9752	151.094	Acanthuridae
2013	Calabas	2	blt	Acanthurus coeruleus	17		-2.8242	2.2638	167.915	Acanthuridae
2013	Calabas	2	prp	Scarus taeniopterus	12	i	-3.2257	2.3852	54.1456	Scaridae
2013	Calabas	2	prp	Scarus taeniopterus	18	i	-3.2257	2.3852	142.422	Scaridae
2013	Calabas	2	prp	Scarus taeniopterus	20	i	-3.2257	2.3852	183.112	Scaridae
2013	Calabas	2	prp	Scarus taeniopterus	20	i	-3.2257	2.3852	183.112	Scaridae
2013	Calabas	2	prp	Scarus taeniopterus	8	j	-3.2257	2.3852	20.585	Scaridae
2013	Calabas	2	prp	Scarus taeniopterus	10	j	-3.2257	2.3852	35.051	Scaridae
2013	Calabas	2	prp	Scarus taeniopterus	10	j	-3.2257	2.3852	35.051	Scaridae
2013	Calabas	2	prp	Scarus taeniopterus	23	t	-3.2257	2.3852	255.56	Scaridae
2013	Calabas	2	qup	Scarus vetula	32	i	-5.0162	3.1109	598.51	Scaridae
2013	Calabas	2	qup	Scarus vetula	33	i	-5.0162	3.1109	658.635	Scaridae
2013	Calabas	2	qup	Scarus vetula	34	t	-5.0162	3.1109	722.733	Scaridae
2013	Calabas	2	rdp	Sparisoma aurofrenatum	21	i	-4.0781	2.7438	196.61	Scaridae
2013	Calabas	2	rdp	Sparisoma aurofrenatum	23	t	-4.0781	2.7438	252.353	Scaridae
2013	Calabas	2	rtp	Sparisoma chrysopterum	30	t	-3.0509	2.3192	494.356	Scaridae
2013	Calabas	2	stop	Sparisoma viride	24	i	-4.4317	2.9051	304.125	Scaridae
2013	Calabas	2	stop	Sparisoma viride	28	i	-4.4317	2.9051	475.925	Scaridae
2013	Calabas	3	dcf	Acanthurus chirurgus	15		-2.4262	2.0768	123.91	Acanthuridae
2013	Calabas	3	prp	Scarus taeniopterus	10	i	-3.2257	2.3852	35.051	Scaridae
2013	Calabas	3	prp	Scarus taeniopterus	17	i	-3.2257	2.3852	124.27	Scaridae
2013	Calabas	3	prp	Scarus taeniopterus	18	i	-3.2257	2.3852	142.422	Scaridae
2013	Calabas	3	prp	Scarus taeniopterus	20	i	-3.2257	2.3852	183.112	Scaridae
2013	Calabas	3	prp	Scarus taeniopterus	21	i	-3.2257	2.3852	205.711	Scaridae
2013	Calabas	3	prp	Scarus taeniopterus	22	i	-3.2257	2.3852	229.851	Scaridae
2013	Calabas	3	prp	Scarus taeniopterus	23	i	-3.2257	2.3852	255.56	Scaridae
2013	Calabas	3	prp	Scarus taeniopterus	10	j	-3.2257	2.3852	35.051	Scaridae
2013	Calabas	3	prp	Scarus taeniopterus	12	j	-3.2257	2.3852	54.1456	Scaridae
2013	Calabas	3	prp	Scarus taeniopterus	23	t	-3.2257	2.3852	255.56	Scaridae
2013	Calabas	3	prp	Scarus taeniopterus	24	t	-3.2257	2.3852	282.865	Scaridae
2013	Calabas	3	qup	Scarus vetula	18	i	-5.0162	3.1109	99.9372	Scaridae
2013	Calabas	3	qup	Scarus vetula	24	i	-5.0162	3.1109	244.568	Scaridae
2013	Calabas	3	qup	Scarus vetula	28	i	-5.0162	3.1109	395.061	Scaridae
2013	Calabas	3	qup	Scarus vetula	32	i	-5.0162	3.1109	598.51	Scaridae
2013	Calabas	3	qup	Scarus vetula	34	t	-5.0162	3.1109	722.733	Scaridae
2013	Calabas	3	rdp	Sparisoma aurofrenatum	21	i	-4.0781	2.7438	196.61	Scaridae
2013	Calabas	3	stop	Sparisoma viride	20	i	-4.4317	2.9051	179.07	Scaridae
2013	Calabas	3	stop	Sparisoma viride	28	i	-4.4317	2.9051	475.925	Scaridae
2013	Calabas	3	stop	Sparisoma viride	30	i	-4.4317	2.9051	581.547	Scaridae
2013	Calabas	3	stop	Sparisoma viride	30	i	-4.4317	2.9051	581.547	Scaridae
2013	Calabas	3	stop	Sparisoma viride	32	i	-4.4317	2.9051	701.473	Scaridae
2013	Calabas	4	dcf	Acanthurus chirurgus	17		-2.4262	2.0768	160.693	Acanthuridae
2013	Calabas	4	blt	Acanthurus coeruleus	15		-2.8242	2.2638	126.484	Acanthuridae
2013	Calabas	4	blt	Acanthurus coeruleus	15		-2.8242	2.2638	126.484	Acanthuridae
2013	Calabas	4	blt	Acanthurus coeruleus	17		-2.8242	2.2638	167.915	Acanthuridae
2013	Calabas	4	blt	Acanthurus coeruleus	18		-2.8242	2.2638	191.111	Acanthuridae
2013	Calabas	4	blt	Acanthurus coeruleus	19		-2.8242	2.2638	215.994	Acanthuridae
2013	Calabas	4	strp	Scarus iseri	22	t	-4.8887	3.0548	184.898	Scaridae
2013	Calabas	4	prp	Scarus taeniopterus	18	i	-3.2257	2.3852	142.422	Scaridae
2013	Calabas	4	prp	Scarus taeniopterus	20	i	-3.2257	2.3852	183.112	Scaridae
2013	Calabas	4	prp	Scarus taeniopterus	9	j	-3.2257	2.3852	27.2621	Scaridae
2013	Calabas	4	prp	Scarus taeniopterus	10	j	-3.2257	2.3852	35.051	Scaridae
2013	Calabas	4	prp	Scarus taeniopterus	12	j	-3.2257	2.3852	54.1456	Scaridae
2013	Calabas	4	prp	Scarus taeniopterus	23	t	-3.2257	2.3852	255.56	Scaridae
2013	Calabas	4	qup	Scarus vetula	32	i	-5.0162	3.1109	598.51	Scaridae
2013	Calabas	4	qup	Scarus vetula	35	t	-5.0162	3.1109	790.936	Scaridae
2013	Calabas	4	rdp	Sparisoma aurofrenatum	19	i	-4.0781	2.7438	149.398	Scaridae
2013	Calabas	4	stop	Sparisoma viride	25	i	-4.4317	2.9051	342.417	Scaridae
2013	Calabas	5	ocs	Acanthurus bahianus	20		-4.6005	2.9752	176.005	Acanthuridae
2013	Calabas	5	blt	Acanthurus coeruleus	18		-2.8242	2.2638	191.111	Acanthuridae
2013	Calabas	5	prp	Scarus taeniopterus	15	i	-3.2257	2.3852	92.1962	Scaridae
2013	Calabas	5	prp	Scarus taeniopterus	20	i	-3.2257	2.3852	183.112	Scaridae
2013	Calabas	5	prp	Scarus taeniopterus	23	t	-3.2257	2.3852	255.56	Scaridae
2013	Calabas	5	prp	Scarus taeniopterus	23	t	-3.2257	2.3852	255.56	Scaridae
2013	Calabas	5	rdp	Sparisoma aurofrenatum	20	i	-4.0781	2.7438	171.975	Scaridae
2013	Calabas	5	rdp	Sparisoma aurofrenatum	22	i	-4.0781	2.7438	223.377	Scaridae
2013	Calabas	5	stop	Sparisoma viride	32	t	-4.4317	2.9051	701.473	Scaridae
2013	Calabas	6	ocs	Acanthurus bahianus	16		-4.6005	2.9752	90.6145	Acanthuridae
2013	Calabas	6	dcf	Acanthurus chirurgus	17		-2.4262	2.0768	160.693	Acanthuridae
2013	Calabas	6	blt	Acanthurus coeruleus	16		-2.8242	2.2638	146.382	Acanthuridae
2013	Calabas	6	strp	Scarus iseri	24	t	-4.8887	3.0548	241.196	Scaridae
2013	Calabas	6	prp	Scarus taeniopterus	10	i	-3.2257	2.3852	35.051	Scaridae
2013	Calabas	6	prp	Scarus taeniopterus	12	i	-3.2257	2.3852	54.1456	Scaridae
2013	Calabas	6	prp	Scarus taeniopterus	15	i	-3.2257	2.3852	92.1962	Scaridae
2013	Calabas	6	prp	Scarus taeniopterus	15	i	-3.2257	2.3852	92.1962	Scaridae
2013	Calabas	6	prp	Scarus taeniopterus	15	i	-3.2257	2.3852	92.1962	Scaridae
2013	Calabas	6	prp	Scarus taeniopterus	16	i	-3.2257	2.3852	107.539	Scaridae
2013	Calabas	6	prp	Scarus taeniopterus	17	i	-3.2257	2.3852	124.27	Scaridae
2013	Calabas	6	prp	Scarus taeniopterus	17	i	-3.2257	2.3852	124.27	Scaridae
2013	Calabas	6	prp	Scarus taeniopterus	18	i	-3.2257	2.3852	142.422	Scaridae
2013	Calabas	6	prp	Scarus taeniopterus	18	i	-3.2257	2.3852	142.422	Scaridae
2013	Calabas	6	prp	Scarus taeniopterus	9	j	-3.2257	2.3852	27.2621	Scaridae
2013	Calabas	6	prp	Scarus taeniopterus	10	j	-3.2257	2.3852	35.051	Scaridae
2013	Calabas	6	prp	Scarus taeniopterus	10	j	-3.2257	2.3852	35.051	Scaridae
2013	Calabas	6	prp	Scarus taeniopterus	23	t	-3.2257	2.3852	255.56	Scaridae
2013	Calabas	6	prp	Scarus taeniopterus	24	t	-3.2257	2.3852	282.865	Scaridae
2013	Calabas	6	qup	Scarus vetula	30	i	-5.0162	3.1109	489.64	Scaridae
2013	Calabas	6	qup	Scarus vetula	36	t	-5.0162	3.1109	863.379	Scaridae
2013	Calabas	6	rdp	Sparisoma aurofrenatum	23	t	-4.0781	2.7438	252.353	Scaridae
2013	Calabas	6	stop	Sparisoma viride	15	i	-4.4317	2.9051	77.6359	Scaridae
2013	Calabas	7	blt	Acanthurus coeruleus	20		-2.8242	2.2638	242.589	Acanthuridae
2013	Calabas	7	strp	Scarus iseri	20	i	-4.8887	3.0548	138.193	Scaridae
2013	Calabas	7	strp	Scarus iseri	20	i	-4.8887	3.0548	138.193	Scaridae
2013	Calabas	7	prp	Scarus taeniopterus	10	i	-3.2257	2.3852	35.051	Scaridae
2013	Calabas	7	prp	Scarus taeniopterus	12	i	-3.2257	2.3852	54.1456	Scaridae
2013	Calabas	7	prp	Scarus taeniopterus	12	i	-3.2257	2.3852	54.1456	Scaridae
2013	Calabas	7	prp	Scarus taeniopterus	12	i	-3.2257	2.3852	54.1456	Scaridae
2013	Calabas	7	prp	Scarus taeniopterus	13	i	-3.2257	2.3852	65.5357	Scaridae
2013	Calabas	7	prp	Scarus taeniopterus	15	i	-3.2257	2.3852	92.1962	Scaridae
2013	Calabas	7	prp	Scarus taeniopterus	18	i	-3.2257	2.3852	142.422	Scaridae
2013	Calabas	7	prp	Scarus taeniopterus	20	i	-3.2257	2.3852	183.112	Scaridae
2013	Calabas	7	prp	Scarus taeniopterus	23	t	-3.2257	2.3852	255.56	Scaridae
2013	Calabas	7	prp	Scarus taeniopterus	24	t	-3.2257	2.3852	282.865	Scaridae
2013	Calabas	7	prp	Scarus taeniopterus	24	t	-3.2257	2.3852	282.865	Scaridae
2013	Calabas	7	qup	Scarus vetula	28	i	-5.0162	3.1109	395.061	Scaridae
2013	Calabas	7	qup	Scarus vetula	32	i	-5.0162	3.1109	598.51	Scaridae
2013	Calabas	7	qup	Scarus vetula	33	t	-5.0162	3.1109	658.635	Scaridae
2013	Calabas	7	qup	Scarus vetula	35	t	-5.0162	3.1109	790.936	Scaridae
2013	Calabas	7	rdp	Sparisoma aurofrenatum	18	i	-4.0781	2.7438	128.8	Scaridae
2013	Calabas	7	rdp	Sparisoma aurofrenatum	20	i	-4.0781	2.7438	171.975	Scaridae
2013	Calabas	7	stop	Sparisoma viride	25	i	-4.4317	2.9051	342.417	Scaridae
2013	Calabas	7	stop	Sparisoma viride	25	i	-4.4317	2.9051	342.417	Scaridae
2013	Calabas	7	stop	Sparisoma viride	27	i	-4.4317	2.9051	428.208	Scaridae
2013	Calabas	7	stop	Sparisoma viride	8	j	-4.4317	2.9051	12.5016	Scaridae
2013	Calabas	7	stop	Sparisoma viride	24		-4.4317	2.9051	304.125	Scaridae
2013	Calabas	8	prp	Scarus taeniopterus	15	i	-3.2257	2.3852	92.1962	Scaridae
2013	Calabas	8	prp	Scarus taeniopterus	17	i	-3.2257	2.3852	124.27	Scaridae
2013	Calabas	8	prp	Scarus taeniopterus	20	i	-3.2257	2.3852	183.112	Scaridae
2013	Calabas	8	prp	Scarus taeniopterus	20	i	-3.2257	2.3852	183.112	Scaridae
2013	Calabas	8	prp	Scarus taeniopterus	7	j	-3.2257	2.3852	14.9702	Scaridae
2013	Calabas	8	prp	Scarus taeniopterus	23	t	-3.2257	2.3852	255.56	Scaridae
2013	Calabas	8	prp	Scarus taeniopterus	23	t	-3.2257	2.3852	255.56	Scaridae
2013	Calabas	8	qup	Scarus vetula	30	i	-5.0162	3.1109	489.64	Scaridae
2013	Calabas	8	qup	Scarus vetula	30	i	-5.0162	3.1109	489.64	Scaridae
2013	Calabas	8	qup	Scarus vetula	30	i	-5.0162	3.1109	489.64	Scaridae
2013	Calabas	8	stop	Sparisoma viride	15	i	-4.4317	2.9051	77.6359	Scaridae
2013	Calabas	8	stop	Sparisoma viride	25	i	-4.4317	2.9051	342.417	Scaridae
2013	Calabas	8	stop	Sparisoma viride	30	i	-4.4317	2.9051	581.547	Scaridae
2013	Calabas	8	stop	Sparisoma viride	30	i	-4.4317	2.9051	581.547	Scaridae
2013	Calabas	9	ocs	Acanthurus bahianus	17		-4.6005	2.9752	108.525	Acanthuridae
2013	Calabas	9	prp	Scarus taeniopterus	18	i	-3.2257	2.3852	142.422	Scaridae
2013	Calabas	9	prp	Scarus taeniopterus	20	i	-3.2257	2.3852	183.112	Scaridae
2013	Calabas	9	prp	Scarus taeniopterus	20	i	-3.2257	2.3852	183.112	Scaridae
2013	Calabas	9	prp	Scarus taeniopterus	8	j	-3.2257	2.3852	20.585	Scaridae
2013	Calabas	9	prp	Scarus taeniopterus	10	j	-3.2257	2.3852	35.051	Scaridae
2013	Calabas	9	prp	Scarus taeniopterus	10	j	-3.2257	2.3852	35.051	Scaridae
2013	Calabas	9	prp	Scarus taeniopterus	23	t	-3.2257	2.3852	255.56	Scaridae
2013	Calabas	9	prp	Scarus taeniopterus	24	t	-3.2257	2.3852	282.865	Scaridae
2013	Calabas	9	qup	Scarus vetula	25	i	-5.0162	3.1109	277.684	Scaridae
2013	Calabas	9	qup	Scarus vetula	28	i	-5.0162	3.1109	395.061	Scaridae
2013	Calabas	9	qup	Scarus vetula	30	i	-5.0162	3.1109	489.64	Scaridae
2013	Calabas	9	qup	Scarus vetula	35	t	-5.0162	3.1109	790.936	Scaridae
2013	Calabas	9	qup	Scarus vetula	36	t	-5.0162	3.1109	863.379	Scaridae
2013	Calabas	9	rdp	Sparisoma aurofrenatum	23	t	-4.0781	2.7438	252.353	Scaridae
2013	Calabas	9	stop	Sparisoma viride	22	i	-4.4317	2.9051	236.196	Scaridae
2013	Calabas	9	stop	Sparisoma viride	25	i	-4.4317	2.9051	342.417	Scaridae
2013	Calabas	9	stop	Sparisoma viride	26	i	-4.4317	2.9051	383.742	Scaridae
2013	Calabas	9	stop	Sparisoma viride	28	i	-4.4317	2.9051	475.925	Scaridae
2013	Calabas	9	stop	Sparisoma viride	30	i	-4.4317	2.9051	581.547	Scaridae
2013	Calabas	9	stop	Sparisoma viride	31	i	-4.4317	2.9051	639.668	Scaridae
2013	Eighteenth Palm	1	dcf	Acanthurus chirurgus	20		-2.4262	2.0768	225.206	Acanthuridae
2013	Eighteenth Palm	1	blt	Acanthurus coeruleus	15		-2.8242	2.2638	126.484	Acanthuridae
2013	Eighteenth Palm	1	strp	Scarus iseri	9	j	-4.8887	3.0548	12.0537	Scaridae
2013	Eighteenth Palm	1	prp	Scarus taeniopterus	12	i	-3.2257	2.3852	54.1456	Scaridae
2013	Eighteenth Palm	1	prp	Scarus taeniopterus	20	i	-3.2257	2.3852	183.112	Scaridae
2013	Eighteenth Palm	1	prp	Scarus taeniopterus	25	t	-3.2257	2.3852	311.793	Scaridae
2013	Eighteenth Palm	1	qup	Scarus vetula	24	i	-5.0162	3.1109	244.568	Scaridae
2013	Eighteenth Palm	1	qup	Scarus vetula	25	i	-5.0162	3.1109	277.684	Scaridae
2013	Eighteenth Palm	1	qup	Scarus vetula	25	i	-5.0162	3.1109	277.684	Scaridae
2013	Eighteenth Palm	1	qup	Scarus vetula	35	t	-5.0162	3.1109	790.936	Scaridae
2013	Eighteenth Palm	1	rdp	Sparisoma aurofrenatum	20	i	-4.0781	2.7438	171.975	Scaridae
2013	Eighteenth Palm	1	rdp	Sparisoma aurofrenatum	19	t	-4.0781	2.7438	149.398	Scaridae
2013	Eighteenth Palm	1	rtp	Sparisoma chrysopterum	30	t	-3.0509	2.3192	494.356	Scaridae
2013	Eighteenth Palm	2	ocs	Acanthurus bahianus	14		-4.6005	2.9752	60.906	Acanthuridae
2013	Eighteenth Palm	2	ocs	Acanthurus bahianus	15		-4.6005	2.9752	74.7837	Acanthuridae
2013	Eighteenth Palm	2	ocs	Acanthurus bahianus	15		-4.6005	2.9752	74.7837	Acanthuridae
2013	Eighteenth Palm	2	blt	Acanthurus coeruleus	15		-2.8242	2.2638	126.484	Acanthuridae
2013	Eighteenth Palm	2	prp	Scarus taeniopterus	20	i	-3.2257	2.3852	183.112	Scaridae
2013	Eighteenth Palm	2	prp	Scarus taeniopterus	10	j	-3.2257	2.3852	35.051	Scaridae
2013	Eighteenth Palm	2	qup	Scarus vetula	23	i	-5.0162	3.1109	214.239	Scaridae
2013	Eighteenth Palm	2	qup	Scarus vetula	28	i	-5.0162	3.1109	395.061	Scaridae
2013	Eighteenth Palm	2	qup	Scarus vetula	35	t	-5.0162	3.1109	790.936	Scaridae
2013	Eighteenth Palm	2	rdp	Sparisoma aurofrenatum	20	i	-4.0781	2.7438	171.975	Scaridae
2013	Eighteenth Palm	2	rdp	Sparisoma aurofrenatum	25	i	-4.0781	2.7438	317.225	Scaridae
2013	Eighteenth Palm	2	stop	Sparisoma viride	25	i	-4.4317	2.9051	342.417	Scaridae
2013	Eighteenth Palm	2	stop	Sparisoma viride	28	i	-4.4317	2.9051	475.925	Scaridae
2013	Eighteenth Palm	3	ocs	Acanthurus bahianus	16		-4.6005	2.9752	90.6145	Acanthuridae
2013	Eighteenth Palm	3	prp	Scarus taeniopterus	10	i	-3.2257	2.3852	35.051	Scaridae
2013	Eighteenth Palm	3	prp	Scarus taeniopterus	13	i	-3.2257	2.3852	65.5357	Scaridae
2013	Eighteenth Palm	3	prp	Scarus taeniopterus	18	i	-3.2257	2.3852	142.422	Scaridae
2013	Eighteenth Palm	3	prp	Scarus taeniopterus	8	j	-3.2257	2.3852	20.585	Scaridae
2013	Eighteenth Palm	3	prp	Scarus taeniopterus	10	j	-3.2257	2.3852	35.051	Scaridae
2013	Eighteenth Palm	3	prp	Scarus taeniopterus	12	j	-3.2257	2.3852	54.1456	Scaridae
2013	Eighteenth Palm	3	prp	Scarus taeniopterus	20	t	-3.2257	2.3852	183.112	Scaridae
2013	Eighteenth Palm	3	prp	Scarus taeniopterus	23	t	-3.2257	2.3852	255.56	Scaridae
2013	Eighteenth Palm	3	qup	Scarus vetula	25	i	-5.0162	3.1109	277.684	Scaridae
2013	Eighteenth Palm	3	qup	Scarus vetula	25	i	-5.0162	3.1109	277.684	Scaridae
2013	Eighteenth Palm	3	qup	Scarus vetula	35	t	-5.0162	3.1109	790.936	Scaridae
2013	Eighteenth Palm	3	rdp	Sparisoma aurofrenatum	21	t	-4.0781	2.7438	196.61	Scaridae
2013	Eighteenth Palm	3	rdp	Sparisoma aurofrenatum	25	t	-4.0781	2.7438	317.225	Scaridae
2013	Eighteenth Palm	3	stop	Sparisoma viride	25	i	-4.4317	2.9051	342.417	Scaridae
2013	Eighteenth Palm	3	stop	Sparisoma viride	25	i	-4.4317	2.9051	342.417	Scaridae
2013	Eighteenth Palm	3	stop	Sparisoma viride	28	i	-4.4317	2.9051	475.925	Scaridae
2013	Eighteenth Palm	3	stop	Sparisoma viride	23	t	-4.4317	2.9051	268.754	Scaridae
2013	Eighteenth Palm	3	stop	Sparisoma viride	32	t	-4.4317	2.9051	701.473	Scaridae
2013	Eighteenth Palm	3	stop	Sparisoma viride	32	t	-4.4317	2.9051	701.473	Scaridae
2013	Eighteenth Palm	4	ocs	Acanthurus bahianus	18		-4.6005	2.9752	128.643	Acanthuridae
2013	Eighteenth Palm	4	strp	Scarus iseri	14	i	-4.8887	3.0548	46.4828	Scaridae
2013	Eighteenth Palm	4	strp	Scarus iseri	20	i	-4.8887	3.0548	138.193	Scaridae
2013	Eighteenth Palm	4	strp	Scarus iseri	21	i	-4.8887	3.0548	160.404	Scaridae
2013	Eighteenth Palm	4	strp	Scarus iseri	4	j	-4.8887	3.0548	1.01222	Scaridae
2013	Eighteenth Palm	4	strp	Scarus iseri	10	j	-4.8887	3.0548	16.6303	Scaridae
2013	Eighteenth Palm	4	strp	Scarus iseri	11	j	-4.8887	3.0548	22.2508	Scaridae
2013	Eighteenth Palm	4	prp	Scarus taeniopterus	9	j	-3.2257	2.3852	27.2621	Scaridae
2013	Eighteenth Palm	4	prp	Scarus taeniopterus	10	j	-3.2257	2.3852	35.051	Scaridae
2013	Eighteenth Palm	4	prp	Scarus taeniopterus	10	j	-3.2257	2.3852	35.051	Scaridae
2013	Eighteenth Palm	4	prp	Scarus taeniopterus	11	j	-3.2257	2.3852	43.9977	Scaridae
2013	Eighteenth Palm	4	prp	Scarus taeniopterus	15	j	-3.2257	2.3852	92.1962	Scaridae
2013	Eighteenth Palm	4	prp	Scarus taeniopterus	19	j	-3.2257	2.3852	162.025	Scaridae
2013	Eighteenth Palm	4	prp	Scarus taeniopterus	24	t	-3.2257	2.3852	282.865	Scaridae
2013	Eighteenth Palm	4	qup	Scarus vetula	24	i	-5.0162	3.1109	244.568	Scaridae
2013	Eighteenth Palm	4	qup	Scarus vetula	28	i	-5.0162	3.1109	395.061	Scaridae
2013	Eighteenth Palm	4	qup	Scarus vetula	35	t	-5.0162	3.1109	790.936	Scaridae
2013	Eighteenth Palm	4	rdp	Sparisoma aurofrenatum	23	t	-4.0781	2.7438	252.353	Scaridae
2013	Eighteenth Palm	4	rdp	Sparisoma aurofrenatum	23	t	-4.0781	2.7438	252.353	Scaridae
2013	Eighteenth Palm	4	stop	Sparisoma viride	13	i	-4.4317	2.9051	51.2291	Scaridae
2013	Eighteenth Palm	4	stop	Sparisoma viride	28	i	-4.4317	2.9051	475.925	Scaridae
2013	Eighteenth Palm	4	stop	Sparisoma viride	30	i	-4.4317	2.9051	581.547	Scaridae
2013	Eighteenth Palm	4	stop	Sparisoma viride	30	t	-4.4317	2.9051	581.547	Scaridae
2013	Eighteenth Palm	5	strp	Scarus iseri	23	t	-4.8887	3.0548	211.79	Scaridae
2013	Eighteenth Palm	5	prp	Scarus taeniopterus	17	j	-3.2257	2.3852	124.27	Scaridae
2013	Eighteenth Palm	5	prp	Scarus taeniopterus	24	t	-3.2257	2.3852	282.865	Scaridae
2013	Eighteenth Palm	5	qup	Scarus vetula	24	i	-5.0162	3.1109	244.568	Scaridae
2013	Eighteenth Palm	5	qup	Scarus vetula	26	i	-5.0162	3.1109	313.719	Scaridae
2013	Eighteenth Palm	5	qup	Scarus vetula	33	t	-5.0162	3.1109	658.635	Scaridae
2013	Eighteenth Palm	5	rdp	Sparisoma aurofrenatum	23	t	-4.0781	2.7438	252.353	Scaridae
2013	Eighteenth Palm	6	ocs	Acanthurus bahianus	17		-4.6005	2.9752	108.525	Acanthuridae
2013	Eighteenth Palm	6	dcf	Acanthurus chirurgus	17		-2.4262	2.0768	160.693	Acanthuridae
2013	Eighteenth Palm	6	blt	Acanthurus coeruleus	17		-2.8242	2.2638	167.915	Acanthuridae
2013	Eighteenth Palm	6	blt	Acanthurus coeruleus	18		-2.8242	2.2638	191.111	Acanthuridae
2013	Eighteenth Palm	6	blt	Acanthurus coeruleus	19		-2.8242	2.2638	215.994	Acanthuridae
2013	Eighteenth Palm	6	blt	Acanthurus coeruleus	19		-2.8242	2.2638	215.994	Acanthuridae
2013	Eighteenth Palm	6	prp	Scarus taeniopterus	20	i	-3.2257	2.3852	183.112	Scaridae
2013	Eighteenth Palm	6	prp	Scarus taeniopterus	12	j	-3.2257	2.3852	54.1456	Scaridae
2013	Eighteenth Palm	6	prp	Scarus taeniopterus	13	j	-3.2257	2.3852	65.5357	Scaridae
2013	Eighteenth Palm	6	prp	Scarus taeniopterus	13	j	-3.2257	2.3852	65.5357	Scaridae
2013	Eighteenth Palm	6	prp	Scarus taeniopterus	15	j	-3.2257	2.3852	92.1962	Scaridae
2013	Eighteenth Palm	6	prp	Scarus taeniopterus	22	t	-3.2257	2.3852	229.851	Scaridae
2013	Eighteenth Palm	6	prp	Scarus taeniopterus	23		-3.2257	2.3852	255.56	Scaridae
2013	Eighteenth Palm	6	qup	Scarus vetula	34	i	-5.0162	3.1109	722.733	Scaridae
2013	Eighteenth Palm	6	rdp	Sparisoma aurofrenatum	17	i	-4.0781	2.7438	110.105	Scaridae
2013	Eighteenth Palm	6	rdp	Sparisoma aurofrenatum	23	t	-4.0781	2.7438	252.353	Scaridae
2013	Eighteenth Palm	6	stop	Sparisoma viride	28	t	-4.4317	2.9051	475.925	Scaridae
2013	Eighteenth Palm	7	ocs	Acanthurus bahianus	16		-4.6005	2.9752	90.6145	Acanthuridae
2013	Eighteenth Palm	7	ocs	Acanthurus bahianus	17		-4.6005	2.9752	108.525	Acanthuridae
2013	Eighteenth Palm	7	blt	Acanthurus coeruleus	20		-2.8242	2.2638	242.589	Acanthuridae
2013	Eighteenth Palm	7	ytd	Microspathodon chrysurus	16		-4.7033	3.0825	123.282	Pomacentridae
2013	Eighteenth Palm	7	strp	Scarus iseri	23	t	-4.8887	3.0548	211.79	Scaridae
2013	Eighteenth Palm	7	prp	Scarus taeniopterus	20	i	-3.2257	2.3852	183.112	Scaridae
2013	Eighteenth Palm	7	prp	Scarus taeniopterus	23	t	-3.2257	2.3852	255.56	Scaridae
2013	Eighteenth Palm	7	prp	Scarus taeniopterus	24	t	-3.2257	2.3852	282.865	Scaridae
2013	Eighteenth Palm	7	prp	Scarus taeniopterus	24	t	-3.2257	2.3852	282.865	Scaridae
2013	Eighteenth Palm	7	qup	Scarus vetula	28	i	-5.0162	3.1109	395.061	Scaridae
2013	Eighteenth Palm	7	stop	Sparisoma viride	15	i	-4.4317	2.9051	77.6359	Scaridae
2013	Eighteenth Palm	7	stop	Sparisoma viride	23	i	-4.4317	2.9051	268.754	Scaridae
2013	Eighteenth Palm	7	stop	Sparisoma viride	33	t	-4.4317	2.9051	767.07	Scaridae
2013	Eighteenth Palm	8	ocs	Acanthurus bahianus	18		-4.6005	2.9752	128.643	Acanthuridae
2013	Eighteenth Palm	8	prp	Scarus taeniopterus	10	i	-3.2257	2.3852	35.051	Scaridae
2013	Eighteenth Palm	8	prp	Scarus taeniopterus	17	i	-3.2257	2.3852	124.27	Scaridae
2013	Eighteenth Palm	8	prp	Scarus taeniopterus	18	i	-3.2257	2.3852	142.422	Scaridae
2013	Eighteenth Palm	8	prp	Scarus taeniopterus	18	i	-3.2257	2.3852	142.422	Scaridae
2013	Eighteenth Palm	8	prp	Scarus taeniopterus	19	i	-3.2257	2.3852	162.025	Scaridae
2013	Eighteenth Palm	8	prp	Scarus taeniopterus	20	i	-3.2257	2.3852	183.112	Scaridae
2013	Eighteenth Palm	8	prp	Scarus taeniopterus	20	i	-3.2257	2.3852	183.112	Scaridae
2013	Eighteenth Palm	8	prp	Scarus taeniopterus	20	i	-3.2257	2.3852	183.112	Scaridae
2013	Eighteenth Palm	8	qup	Scarus vetula	33	t	-5.0162	3.1109	658.635	Scaridae
2013	Eighteenth Palm	8	rdp	Sparisoma aurofrenatum	10	j	-4.0781	2.7438	25.6744	Scaridae
2013	Eighteenth Palm	8	rdp	Sparisoma aurofrenatum	22	t	-4.0781	2.7438	223.377	Scaridae
2013	Eighteenth Palm	8	rdp	Sparisoma aurofrenatum	22	t	-4.0781	2.7438	223.377	Scaridae
2013	Eighteenth Palm	8	rdp	Sparisoma aurofrenatum	23	t	-4.0781	2.7438	252.353	Scaridae
2013	Eighteenth Palm	9	ocs	Acanthurus bahianus	19		-4.6005	2.9752	151.094	Acanthuridae
2013	Eighteenth Palm	9	blt	Acanthurus coeruleus	20		-2.8242	2.2638	242.589	Acanthuridae
2013	Eighteenth Palm	9	prp	Scarus taeniopterus	15	i	-3.2257	2.3852	92.1962	Scaridae
2013	Eighteenth Palm	9	prp	Scarus taeniopterus	19	i	-3.2257	2.3852	162.025	Scaridae
2013	Eighteenth Palm	9	prp	Scarus taeniopterus	20	i	-3.2257	2.3852	183.112	Scaridae
2013	Eighteenth Palm	9	prp	Scarus taeniopterus	21	i	-3.2257	2.3852	205.711	Scaridae
2013	Eighteenth Palm	9	prp	Scarus taeniopterus	10	j	-3.2257	2.3852	35.051	Scaridae
2013	Eighteenth Palm	9	prp	Scarus taeniopterus	12	j	-3.2257	2.3852	54.1456	Scaridae
2013	Eighteenth Palm	9	prp	Scarus taeniopterus	12	j	-3.2257	2.3852	54.1456	Scaridae
2013	Eighteenth Palm	9	prp	Scarus taeniopterus	13	j	-3.2257	2.3852	65.5357	Scaridae
2013	Eighteenth Palm	9	prp	Scarus taeniopterus	13	j	-3.2257	2.3852	65.5357	Scaridae
2013	Eighteenth Palm	9	prp	Scarus taeniopterus	15	j	-3.2257	2.3852	92.1962	Scaridae
2013	Eighteenth Palm	9	prp	Scarus taeniopterus	23	t	-3.2257	2.3852	255.56	Scaridae
2013	Eighteenth Palm	9	prp	Scarus taeniopterus	25	t	-3.2257	2.3852	311.793	Scaridae
2013	Eighteenth Palm	9	rdp	Sparisoma aurofrenatum	23	t	-4.0781	2.7438	252.353	Scaridae
2013	Eighteenth Palm	9	stop	Sparisoma viride	20	i	-4.4317	2.9051	179.07	Scaridae
2013	Eighteenth Palm	9	stop	Sparisoma viride	23	i	-4.4317	2.9051	268.754	Scaridae
2013	Eighteenth Palm	9	stop	Sparisoma viride	25	i	-4.4317	2.9051	342.417	Scaridae
2013	Eighteenth Palm	9	stop	Sparisoma viride	25	i	-4.4317	2.9051	342.417	Scaridae
2013	Eighteenth Palm	9	stop	Sparisoma viride	28	i	-4.4317	2.9051	475.925	Scaridae
2013	Eighteenth Palm	10	ocs	Acanthurus bahianus	15		-4.6005	2.9752	74.7837	Acanthuridae
2013	Eighteenth Palm	10	blt	Acanthurus coeruleus	19		-2.8242	2.2638	215.994	Acanthuridae
2013	Eighteenth Palm	10	blt	Acanthurus coeruleus	20		-2.8242	2.2638	242.589	Acanthuridae
2013	Eighteenth Palm	10	strp	Scarus iseri	10	j	-4.8887	3.0548	16.6303	Scaridae
2013	Eighteenth Palm	10	strp	Scarus iseri	13	j	-4.8887	3.0548	37.0659	Scaridae
2013	Eighteenth Palm	10	prp	Scarus taeniopterus	12	i	-3.2257	2.3852	54.1456	Scaridae
2013	Eighteenth Palm	10	prp	Scarus taeniopterus	15	i	-3.2257	2.3852	92.1962	Scaridae
2013	Eighteenth Palm	10	prp	Scarus taeniopterus	19	i	-3.2257	2.3852	162.025	Scaridae
2013	Eighteenth Palm	10	prp	Scarus taeniopterus	20	i	-3.2257	2.3852	183.112	Scaridae
2013	Eighteenth Palm	10	prp	Scarus taeniopterus	21	i	-3.2257	2.3852	205.711	Scaridae
2013	Eighteenth Palm	10	prp	Scarus taeniopterus	10	j	-3.2257	2.3852	35.051	Scaridae
2013	Eighteenth Palm	10	prp	Scarus taeniopterus	10	j	-3.2257	2.3852	35.051	Scaridae
2013	Eighteenth Palm	10	prp	Scarus taeniopterus	10	j	-3.2257	2.3852	35.051	Scaridae
2013	Eighteenth Palm	10	prp	Scarus taeniopterus	10	j	-3.2257	2.3852	35.051	Scaridae
2013	Eighteenth Palm	10	prp	Scarus taeniopterus	10	j	-3.2257	2.3852	35.051	Scaridae
2013	Eighteenth Palm	10	prp	Scarus taeniopterus	10	j	-3.2257	2.3852	35.051	Scaridae
2013	Eighteenth Palm	10	prp	Scarus taeniopterus	10	j	-3.2257	2.3852	35.051	Scaridae
2013	Eighteenth Palm	10	prp	Scarus taeniopterus	10	j	-3.2257	2.3852	35.051	Scaridae
2013	Eighteenth Palm	10	prp	Scarus taeniopterus	23	t	-3.2257	2.3852	255.56	Scaridae
2013	Eighteenth Palm	10	qup	Scarus vetula	32	t	-5.0162	3.1109	598.51	Scaridae
2013	Eighteenth Palm	10	stop	Sparisoma viride	28	i	-4.4317	2.9051	475.925	Scaridae
2013	Eighteenth Palm	10	stop	Sparisoma viride	33	t	-4.4317	2.9051	767.07	Scaridae
2013	Forest	1	ytd	Microspathodon chrysurus	12		-4.7033	3.0825	50.7898	Pomacentridae
2013	Forest	1	prp	Scarus taeniopterus	12	i	-3.2257	2.3852	54.1456	Scaridae
2013	Forest	1	prp	Scarus taeniopterus	15	i	-3.2257	2.3852	92.1962	Scaridae
2013	Forest	1	prp	Scarus taeniopterus	18	i	-3.2257	2.3852	142.422	Scaridae
2013	Forest	1	prp	Scarus taeniopterus	20	i	-3.2257	2.3852	183.112	Scaridae
2013	Forest	1	prp	Scarus taeniopterus	24	t	-3.2257	2.3852	282.865	Scaridae
2013	Forest	1	prp	Scarus taeniopterus	24	t	-3.2257	2.3852	282.865	Scaridae
2013	Forest	1	qup	Scarus vetula	23	i	-5.0162	3.1109	214.239	Scaridae
2013	Forest	1	qup	Scarus vetula	25	i	-5.0162	3.1109	277.684	Scaridae
2013	Forest	1	qup	Scarus vetula	30	t	-5.0162	3.1109	489.64	Scaridae
2013	Forest	1	qup	Scarus vetula	34	t	-5.0162	3.1109	722.733	Scaridae
2013	Forest	1	stop	Sparisoma viride	12	i	-4.4317	2.9051	40.6003	Scaridae
2013	Forest	1	stop	Sparisoma viride	22	i	-4.4317	2.9051	236.196	Scaridae
2013	Forest	1	stop	Sparisoma viride	31	t	-4.4317	2.9051	639.668	Scaridae
2013	Forest	1	stop	Sparisoma viride	32	t	-4.4317	2.9051	701.473	Scaridae
2013	Forest	2	blt	Acanthurus coeruleus	15		-2.8242	2.2638	126.484	Acanthuridae
2013	Forest	2	prp	Scarus taeniopterus	14	i	-3.2257	2.3852	78.2068	Scaridae
2013	Forest	2	prp	Scarus taeniopterus	15	i	-3.2257	2.3852	92.1962	Scaridae
2013	Forest	2	prp	Scarus taeniopterus	16	i	-3.2257	2.3852	107.539	Scaridae
2013	Forest	2	prp	Scarus taeniopterus	17	i	-3.2257	2.3852	124.27	Scaridae
2013	Forest	2	prp	Scarus taeniopterus	18	i	-3.2257	2.3852	142.422	Scaridae
2013	Forest	2	prp	Scarus taeniopterus	19	i	-3.2257	2.3852	162.025	Scaridae
2013	Forest	2	prp	Scarus taeniopterus	20	i	-3.2257	2.3852	183.112	Scaridae
2013	Forest	2	qup	Scarus vetula	21	i	-5.0162	3.1109	161.433	Scaridae
2013	Forest	2	qup	Scarus vetula	35	t	-5.0162	3.1109	790.936	Scaridae
2013	Forest	2	rdp	Sparisoma aurofrenatum	22	t	-4.0781	2.7438	223.377	Scaridae
2013	Forest	2	rdp	Sparisoma aurofrenatum	23	t	-4.0781	2.7438	252.353	Scaridae
2013	Forest	2	stop	Sparisoma viride	32	i	-4.4317	2.9051	701.473	Scaridae
2013	Forest	3	prp	Scarus taeniopterus	19	i	-3.2257	2.3852	162.025	Scaridae
2013	Forest	3	prp	Scarus taeniopterus	24	t	-3.2257	2.3852	282.865	Scaridae
2013	Forest	3	qup	Scarus vetula	20	i	-5.0162	3.1109	138.699	Scaridae
2013	Forest	3	qup	Scarus vetula	24	i	-5.0162	3.1109	244.568	Scaridae
2013	Forest	3	qup	Scarus vetula	25	i	-5.0162	3.1109	277.684	Scaridae
2013	Forest	3	qup	Scarus vetula	34	t	-5.0162	3.1109	722.733	Scaridae
2013	Forest	3	stop	Sparisoma viride	22	i	-4.4317	2.9051	236.196	Scaridae
2013	Forest	3	stop	Sparisoma viride	31	i	-4.4317	2.9051	639.668	Scaridae
2013	Forest	3	stop	Sparisoma viride	31	i	-4.4317	2.9051	639.668	Scaridae
2013	Forest	3	stop	Sparisoma viride	32	t	-4.4317	2.9051	701.473	Scaridae
2013	Forest	3	stop	Sparisoma viride	32	t	-4.4317	2.9051	701.473	Scaridae
2013	Forest	3	stop	Sparisoma viride	32	t	-4.4317	2.9051	701.473	Scaridae
2013	Forest	4	prp	Scarus taeniopterus	15	i	-3.2257	2.3852	92.1962	Scaridae
2013	Forest	4	prp	Scarus taeniopterus	15	i	-3.2257	2.3852	92.1962	Scaridae
2013	Forest	4	prp	Scarus taeniopterus	19	i	-3.2257	2.3852	162.025	Scaridae
2013	Forest	4	prp	Scarus taeniopterus	20	i	-3.2257	2.3852	183.112	Scaridae
2013	Forest	4	prp	Scarus taeniopterus	23	i	-3.2257	2.3852	255.56	Scaridae
2013	Forest	4	prp	Scarus taeniopterus	30	i	-3.2257	2.3852	481.648	Scaridae
2013	Forest	4	prp	Scarus taeniopterus	24	t	-3.2257	2.3852	282.865	Scaridae
2013	Forest	4	qup	Scarus vetula	22	i	-5.0162	3.1109	186.57	Scaridae
2013	Forest	4	qup	Scarus vetula	24	i	-5.0162	3.1109	244.568	Scaridae
2013	Forest	4	qup	Scarus vetula	32	t	-5.0162	3.1109	598.51	Scaridae
2013	Forest	4	rdp	Sparisoma aurofrenatum	21	t	-4.0781	2.7438	196.61	Scaridae
2013	Forest	4	rdp	Sparisoma aurofrenatum	22	t	-4.0781	2.7438	223.377	Scaridae
2013	Forest	4	rdp	Sparisoma aurofrenatum	22	t	-4.0781	2.7438	223.377	Scaridae
2013	Forest	4	rdp	Sparisoma aurofrenatum	23	t	-4.0781	2.7438	252.353	Scaridae
2013	Forest	4	stop	Sparisoma viride	30	i	-4.4317	2.9051	581.547	Scaridae
2013	Forest	4	stop	Sparisoma viride	33	t	-4.4317	2.9051	767.07	Scaridae
2013	Forest	5	blt	Acanthurus coeruleus	15		-2.8242	2.2638	126.484	Acanthuridae
2013	Forest	5	prp	Scarus taeniopterus	19	i	-3.2257	2.3852	162.025	Scaridae
2013	Forest	5	prp	Scarus taeniopterus	19	i	-3.2257	2.3852	162.025	Scaridae
2013	Forest	5	prp	Scarus taeniopterus	10	j	-3.2257	2.3852	35.051	Scaridae
2013	Forest	5	prp	Scarus taeniopterus	12	j	-3.2257	2.3852	54.1456	Scaridae
2013	Forest	5	prp	Scarus taeniopterus	22	t	-3.2257	2.3852	229.851	Scaridae
2013	Forest	5	prp	Scarus taeniopterus	23	t	-3.2257	2.3852	255.56	Scaridae
2013	Forest	5	qup	Scarus vetula	25	i	-5.0162	3.1109	277.684	Scaridae
2013	Forest	5	qup	Scarus vetula	27	i	-5.0162	3.1109	352.801	Scaridae
2013	Forest	5	qup	Scarus vetula	35	t	-5.0162	3.1109	790.936	Scaridae
2013	Forest	5	rdp	Sparisoma aurofrenatum	12	i	-4.0781	2.7438	42.3406	Scaridae
2013	Forest	5	rdp	Sparisoma aurofrenatum	15	i	-4.0781	2.7438	78.1015	Scaridae
2013	Forest	5	rdp	Sparisoma aurofrenatum	15	i	-4.0781	2.7438	78.1015	Scaridae
2013	Forest	5	rdp	Sparisoma aurofrenatum	17	i	-4.0781	2.7438	110.105	Scaridae
2013	Forest	5	rdp	Sparisoma aurofrenatum	23	t	-4.0781	2.7438	252.353	Scaridae
2013	Forest	5	stop	Sparisoma viride	12	i	-4.4317	2.9051	40.6003	Scaridae
2013	Forest	5	stop	Sparisoma viride	27	i	-4.4317	2.9051	428.208	Scaridae
2013	Forest	5	stop	Sparisoma viride	30	i	-4.4317	2.9051	581.547	Scaridae
2013	Forest	5	stop	Sparisoma viride	30	i	-4.4317	2.9051	581.547	Scaridae
2013	Forest	6	blt	Acanthurus coeruleus	15		-2.8242	2.2638	126.484	Acanthuridae
2013	Forest	6	ytd	Microspathodon chrysurus	14		-4.7033	3.0825	81.6845	Pomacentridae
2013	Forest	6	prp	Scarus taeniopterus	12	i	-3.2257	2.3852	54.1456	Scaridae
2013	Forest	6	prp	Scarus taeniopterus	15	i	-3.2257	2.3852	92.1962	Scaridae
2013	Forest	6	prp	Scarus taeniopterus	15	i	-3.2257	2.3852	92.1962	Scaridae
2013	Forest	6	prp	Scarus taeniopterus	20	i	-3.2257	2.3852	183.112	Scaridae
2013	Forest	6	prp	Scarus taeniopterus	6	j	-3.2257	2.3852	10.3645	Scaridae
2013	Forest	6	prp	Scarus taeniopterus	7	j	-3.2257	2.3852	14.9702	Scaridae
2013	Forest	6	prp	Scarus taeniopterus	7	j	-3.2257	2.3852	14.9702	Scaridae
2013	Forest	6	prp	Scarus taeniopterus	10	j	-3.2257	2.3852	35.051	Scaridae
2013	Forest	6	prp	Scarus taeniopterus	12	j	-3.2257	2.3852	54.1456	Scaridae
2013	Forest	6	prp	Scarus taeniopterus	23	t	-3.2257	2.3852	255.56	Scaridae
2013	Forest	6	prp	Scarus taeniopterus	23	t	-3.2257	2.3852	255.56	Scaridae
2013	Forest	6	rdp	Sparisoma aurofrenatum	21	t	-4.0781	2.7438	196.61	Scaridae
2013	Forest	6	stop	Sparisoma viride	28	i	-4.4317	2.9051	475.925	Scaridae
2013	Forest	7	blt	Acanthurus coeruleus	15		-2.8242	2.2638	126.484	Acanthuridae
2013	Forest	7	ytd	Microspathodon chrysurus	15		-4.7033	3.0825	101.042	Pomacentridae
2013	Forest	7	prp	Scarus taeniopterus	17	i	-3.2257	2.3852	124.27	Scaridae
2013	Forest	7	prp	Scarus taeniopterus	18	i	-3.2257	2.3852	142.422	Scaridae
2013	Forest	7	prp	Scarus taeniopterus	20	i	-3.2257	2.3852	183.112	Scaridae
2013	Forest	7	prp	Scarus taeniopterus	5	j	-3.2257	2.3852	6.70939	Scaridae
2013	Forest	7	prp	Scarus taeniopterus	7	j	-3.2257	2.3852	14.9702	Scaridae
2013	Forest	7	prp	Scarus taeniopterus	22	t	-3.2257	2.3852	229.851	Scaridae
2013	Forest	7	qup	Scarus vetula	29	i	-5.0162	3.1109	440.63	Scaridae
2013	Forest	7	qup	Scarus vetula	34	t	-5.0162	3.1109	722.733	Scaridae
2013	Forest	7	rdp	Sparisoma aurofrenatum	17	i	-4.0781	2.7438	110.105	Scaridae
2013	Forest	7	rdp	Sparisoma aurofrenatum	23	t	-4.0781	2.7438	252.353	Scaridae
2013	Forest	7	stop	Sparisoma viride	21	i	-4.4317	2.9051	206.338	Scaridae
[truncated: 4,582 more rows]

## Sheet: Summary_2017
Appendix X. Herbivorous fish summary data
	Biomass		Density		Fork Length
	(g per 100m2)		(# per 100m2)		(cm)
	mean	SE	mean	SE	mean	SE
Bachelor's Beach (n=7)
Acanthurus bahianus	0	0	0	0	NA	NA
Acanthurus chirurgus	143.886	39.8377	1.30952	0.400774	14.375	0.438137
Acanthurus coeruleus	81.5347	37.6809	0.833333	0.363696	12.9583	0.891427
Microspathodon chrysurus	80.0639	30.2025	1.07143	0.350467	13.2667	0.440058
Scarus coelestinus	0	0	0	0	NA	NA
Scarus coeruleus	0	0	0	0	NA	NA
Scarus guacamaia	0	0	0	0	NA	NA
Scarus iseri	158.819	48.0613	1.19048	0.400774	19.8333	0.695792
Scarus taeniopterus	856.801	56.3061	7.14286	0.62618	16.0423	0.394322
Scarus vetula	743.604	180.463	2.61905	0.614759	23.25	1.70701
Sparisoma aurofrenatum	166.796	36.1264	1.90476	0.350467	14.3452	1.09931
Sparisoma chrysopterum	95.8908	46.0376	0.357143	0.168359	23	0.654654
Sparisoma viride	897.825	86.754	3.21429	0.558383	23.1357	1.74065
Sparisoma rubripinne	0	0	0	0	NA	NA
Acanthurids	225.421	60.6834	2.14286	0.599193	13.8722	0.375302
Scarids	2919.74	244.155	16.4286	1.56129	18.3176	0.243928
Total Denuders	3225.22	229.974	23.5714	1.42857	17.4675	0.284649
Barcadera (n=7)
Acanthurus bahianus	7.25072	7.25072	0.119048	0.119048	14	NA
Acanthurus chirurgus	29.649	19.391	0.238095	0.15369	15	0.534522
Acanthurus coeruleus	120.362	64.3905	0.952381	0.461069	14.4375	0.700234
Microspathodon chrysurus	126.727	34.8271	1.30952	0.357143	14.7222	0.377264
Scarus coelestinus	0	0	0	0	NA	NA
Scarus coeruleus	0	0	0	0	NA	NA
Scarus guacamaia	0	0	0	0	NA	NA
Scarus iseri	22.0769	18.8297	0.357143	0.247817	15	3.20713
Scarus taeniopterus	791.201	87.2606	6.30952	0.942408	16.2667	0.436618
Scarus vetula	1720.44	503.066	3.80952	0.85017	27.3046	0.724563
Sparisoma aurofrenatum	222.667	74.4683	1.90476	0.595238	16.9444	0.809337
Sparisoma chrysopterum	58.8519	58.8519	0.119048	0.119048	30	NA
Sparisoma viride	1336.62	270.368	4.52381	1.07363	23.1086	1.06627
Sparisoma rubripinne	0	0	0	0	NA	NA
Acanthurids	157.261	64.9597	1.30952	0.47619	14.6833	0.469507
Scarids	4151.85	399.824	17.0238	1.65529	20.6521	0.648376
Total Denuders	4435.84	410.048	23.5714	2.09145	19.8173	0.516057
Calabas (n=5)
Acanthurus bahianus	29.3341	29.3341	0.166667	0.166667	20	NA
Acanthurus chirurgus	222.437	81.7115	1.16667	0.565194	19.625	1.02266
Acanthurus coeruleus	21.0807	21.0807	0.166667	0.166667	15	NA
Microspathodon chrysurus	0	0	0	0	NA	NA
Scarus coelestinus	0	0	0	0	NA	NA
Scarus coeruleus	0	0	0	0	NA	NA
Scarus guacamaia	0	0	0	0	NA	NA
Scarus iseri	281.802	111.456	1.83333	0.71686	19.55	1.03376
Scarus taeniopterus	823.038	238.016	3.16667	0.964653	23.35	2.44017
Scarus vetula	1661.01	297.415	1.66667	0.263523	36.9	2.02731
Sparisoma aurofrenatum	518.471	164.837	2.5	0.874007	21.1286	0.628571
Sparisoma chrysopterum	117.802	117.802	0.166667	0.166667	35	NA
Sparisoma viride	1997.01	576.167	3	0.677003	29.42	2.8967
Sparisoma rubripinne	0	0	0	0	NA	NA
Acanthurids	272.852	86.0152	1.5	0.552771	18.75	0.939858
Scarids	5399.14	930.418	12.3333	1.56791	25.3422	1.1139
Total Denuders	5671.99	877.731	16.6	1.91311	24.5688	1.10562
Eighteenth Palm (n=7)
Acanthurus bahianus	21.7521	15.0936	0.357143	0.247817	14	0
Acanthurus chirurgus	636.867	574.025	4.52381	3.83548	13.6545	0.721323
Acanthurus coeruleus	1457.48	1185.9	10.119	8.08852	15.5	0.377964
Microspathodon chrysurus	9.72435	9.72435	0.119048	0.119048	14	NA
Scarus coelestinus	0	0	0	0	NA	NA
Scarus coeruleus	0	0	0	0	NA	NA
Scarus guacamaia	0	0	0	0	NA	NA
Scarus iseri	131.459	42.1332	1.66667	0.514344	16.3278	1.40092
Scarus taeniopterus	767.965	82.6063	7.97619	1.57335	14.855	1.05946
Scarus vetula	709.131	120.947	2.02381	0.247817	24.9524	2.25894
Sparisoma aurofrenatum	208.931	55.1262	2.2619	0.595238	15.5	0.961563
Sparisoma chrysopterum	0	0	0	0	NA	NA
Sparisoma viride	869.567	138.528	2.85714	0.652051	23.7333	1.1334
Sparisoma rubripinne	59.8962	39.662	0.238095	0.15369	23.5	0.801784
Acanthurids	2116.1	1753.8	15	11.8383	14.4411	0.487839
Scarids	2746.95	183.677	17.0238	1.86212	17.5351	1.14705
Total Denuders	4872.77	1770.52	38.5714	13.6467	16.745	0.905789
Forest, Klein Bonaire (n=7)
Acanthurus bahianus	0	0	0	0	NA	NA
Acanthurus chirurgus	92.0117	76.2029	0.595238	0.471204	16	0.534522
Acanthurus coeruleus	179.575	45.0455	1.30952	0.30738	15.4167	0.346754
Microspathodon chrysurus	27.8635	10.4347	0.47619	0.168359	12.5	0.377964
Scarus coelestinus	0	0	0	0	NA	NA
Scarus coeruleus	0	0	0	0	NA	NA
Scarus guacamaia	0	0	0	0	NA	NA
Scarus iseri	53.8796	26.4483	0.595238	0.350467	17.8889	1.07152
Scarus taeniopterus	2206.13	543.624	26.3095	5.90897	13.4751	0.611723
Scarus vetula	537.807	83.9679	1.78571	0.21735	24.7857	1.7445
Sparisoma aurofrenatum	187.393	53.7124	2.38095	0.614759	14.0952	1.28373
Sparisoma chrysopterum	0	0	0	0	NA	NA
Sparisoma viride	1555.34	221.824	5.71429	0.801548	20.882	1.26474
Sparisoma rubripinne	0	0	0	0	NA	NA
Acanthurids	271.587	81.8307	1.90476	0.505076	15.4944	0.395243
Scarids	4540.55	512.68	36.7857	5.75465	15.4302	0.326493
Total Denuders	4840	568.592	47	7.0778	15.3903	0.320084
Front Porch (n=4)
Acanthurus bahianus	0	0	0	0	NA	NA
Acanthurus chirurgus	234.825	97.0657	1.25	0.537914	18.3889	0.973016
Acanthurus coeruleus	44.9988	44.9988	0.208333	0.208333	19	NA
Microspathodon chrysurus	0	0	0	0	NA	NA
Scarus coelestinus	0	0	0	0	NA	NA
Scarus coeruleus	0	0	0	0	NA	NA
Scarus guacamaia	0	0	0	0	NA	NA
Scarus iseri	131.673	76.7476	1.25	0.797856	18.5	1.06066
Scarus taeniopterus	376.846	117.533	1.25	0.240563	23.625	3.13166
Scarus vetula	804.265	303.96	1.25	0.416667	31.1667	4.09268
Sparisoma aurofrenatum	252.511	97.2302	1.45833	0.524294	19.8889	0.419435
Sparisoma chrysopterum	0	0	0	0	NA	NA
Sparisoma viride	3685.44	160.626	13.125	1.33398	22.988	0.635935
Sparisoma rubripinne	0	0	0	0	NA	NA
Acanthurids	279.823	127.771	1.45833	0.625	18.2222	0.83887
Scarids	5250.74	442.396	18.3333	2.6571	23.258	1.1273
Total Denuders	5530.56	480.506	23.75	3.68273	23.0032	1.22658
Karpata (n=7)
Acanthurus bahianus	0	0	0	0	NA	NA
Acanthurus chirurgus	12.782	12.782	0.119048	0.119048	14	NA
Acanthurus coeruleus	103.352	31.1029	0.952381	0.28339	13.8	0.544453
Microspathodon chrysurus	43.8888	28.5134	0.595238	0.394836	13.6667	0.712697
Scarus coelestinus	0	0	0	0	NA	NA
Scarus coeruleus	0	0	0	0	NA	NA
Scarus guacamaia	0	0	0	0	NA	NA
Scarus iseri	15.0157	11.6254	1.42857	0.743452	6.83333	1.20258
Scarus taeniopterus	794.791	134.272	14.5238	1.61484	10.3192	1.044
Scarus vetula	707.97	115.262	2.97619	0.509731	23.2857	0.967367
Sparisoma aurofrenatum	319.141	47.7308	3.21429	0.614759	16.0476	0.648272
Sparisoma chrysopterum	38.5588	38.5588	0.119048	0.119048	25	NA
Sparisoma viride	577.027	153.342	4.04762	0.934859	13.9327	1.31171
Sparisoma rubripinne	47.7743	39.7467	0.238095	0.15369	20.5	2.93987
Acanthurids	116.134	38.2665	1.07143	0.350467	13.8	0.544453
Scarids	2542.51	217.107	26.6667	2.55883	13.064	0.543215
Total Denuders	2702.53	220.865	34	2.88675	13.0385	0.518313
No-Dive Reserve (n=6)
Acanthurus bahianus	0	0	0	0	NA	NA
Acanthurus chirurgus	290.166	290.166	2.22222	2.22222	15.375	NA
Acanthurus coeruleus	1950.71	1695.27	15.4167	13.5993	15.36	1.01596
Microspathodon chrysurus	0	0	0	0	NA	NA
Scarus coelestinus	0	0	0	0	NA	NA
Scarus coeruleus	0	0	0	0	NA	NA
Scarus guacamaia	0	0	0	0	NA	NA
Scarus iseri	1.6756	1.45	0.972222	0.694444	4.15	0.375278
Scarus taeniopterus	834.727	138.431	10.9722	1.26229	12.0106	0.770184
Scarus vetula	1050.75	199.429	1.94444	0.351364	29.4861	2.8636
Sparisoma aurofrenatum	120.293	42.2886	1.25	0.356812	14	2.42813
Sparisoma chrysopterum	0	0	0	0	NA	NA
Sparisoma viride	1390.88	153.965	3.75	0.468943	22.6917	2.40117
Sparisoma rubripinne	0	0	0	0	NA	NA
Acanthurids	2240.88	1985.06	17.6389	15.8193	15.3731	1.01479
Scarids	3398.33	266.392	18.8889	1.17195	15.5571	0.946385
Total Denuders	5639.21	2165.39	43.8333	19.882	15.4437	0.848524
Oil Slick (n=7)
Acanthurus bahianus	0	0	0	0	NA	NA
Acanthurus chirurgus	111.226	52.0463	0.833333	0.363696	15.0417	0.472456
Acanthurus coeruleus	100.94	25.1942	0.952381	0.21735	13.6667	0.39036
Microspathodon chrysurus	52.2643	22.1109	0.714286	0.28339	13.25	0.361873
Scarus coelestinus	0	0	0	0	NA	NA
Scarus coeruleus	0	0	0	0	NA	NA
Scarus guacamaia	149.07	149.07	0.119048	0.119048	40	NA
Scarus iseri	280.309	102.803	3.45238	0.73707	15.7306	1.59008
Scarus taeniopterus	380.251	73.2787	3.09524	0.673435	16.7653	1.30174
Scarus vetula	1329.61	176.097	3.92857	0.595238	25.169	1.6093
Sparisoma aurofrenatum	408.06	78.6589	3.09524	0.673435	17.5714	0.917998
Sparisoma chrysopterum	0	0	0	0	NA	NA
Sparisoma viride	983.022	308.605	3.45238	0.423694	20.8714	2.05421
Sparisoma rubripinne	0	0	0	0	NA	NA
Acanthurids	212.166	55.3883	1.78571	0.382685	14.0595	0.477231
Scarids	3530.32	363.954	17.1429	1.86212	19.4358	0.690833
Total Denuders	3794.75	335.213	23.5714	2.36902	18.7661	0.640617
Reef Scientifico (n=7)
Acanthurus bahianus	10.7874	10.7874	0.119048	0.119048	16	NA
Acanthurus chirurgus	106.487	35.4897	0.952381	0.336718	14.5	0.377964
Acanthurus coeruleus	53.8865	30.1008	0.47619	0.247817	14	0.377964
Microspathodon chrysurus	6.0464	6.0464	0.119048	0.119048	12	NA
Scarus coelestinus	0	0	0	0	NA	NA
Scarus coeruleus	0	0	0	0	NA	NA
Scarus guacamaia	0	0	0	0	NA	NA
Scarus iseri	12.4445	9.07691	0.357143	0.247817	12.5	0.267261
Scarus taeniopterus	674.538	111.112	6.07143	1.25613	15.9067	0.37955
Scarus vetula	648.671	148.713	2.14286	0.440101	24.919	0.958224
Sparisoma aurofrenatum	117.698	28.0587	1.54762	0.382685	14.5417	0.968092
Sparisoma chrysopterum	0	0	0	0	NA	NA
Sparisoma viride	1004.14	134.128	4.28571	0.614759	21.7714	0.388813
Sparisoma rubripinne	0	0	0	0	NA	NA
Acanthurids	171.161	44.3328	1.54762	0.382685	14.4167	0.244787
Scarids	2457.49	312.205	14.4048	1.53997	18.4096	0.263752
Total Denuders	2634.7	330.191	19.2857	2.1571	18.0071	0.293401
Windsock (n=7)
Acanthurus bahianus	26.941	18.7378	0.357143	0.247817	15	0
Acanthurus chirurgus	244.815	80.9007	2.14286	0.652051	14.0417	0.507777
Acanthurus coeruleus	77.3457	30.4674	0.952381	0.382685	12.3333	0.590937
Microspathodon chrysurus	44.8444	14.5908	0.595238	0.15369	13.4	0.736788
Scarus coelestinus	0	0	0	0	NA	NA
Scarus coeruleus	0	0	0	0	NA	NA
Scarus guacamaia	0	0	0	0	NA	NA
Scarus iseri	120.633	36.0021	0.952381	0.336718	19.6667	0.821342
Scarus taeniopterus	827.546	131.441	6.42857	1.14599	16.9338	0.532065
Scarus vetula	1045.78	135.092	2.38095	0.382685	27.6881	1.0761
Sparisoma aurofrenatum	148.705	41.0469	1.07143	0.238095	17.9167	0.865338
Sparisoma chrysopterum	0	0	0	0	NA	NA
Sparisoma viride	1542.45	185.639	3.92857	0.4347	25.6031	0.640746
Sparisoma rubripinne	0	0	0	0	NA	NA
Acanthurids	349.101	87.4676	3.45238	0.780647	13.7754	0.304954
Scarids	3685.12	242.086	14.7619	1.25613	21.1553	0.590175
Total Denuders	4079.06	270.879	22.5714	2.09145	19.6253	0.522251
Bonaire Average (n=11)
Acanthurus bahianus	5.77507	3.40055	0.0584416	0.034632	NA	NA
Acanthurus chirurgus	67.7801	28.4587	0.506494	0.218904	15.4547	0.572971
Acanthurus coeruleus	53.0227	18.9653	0.469697	0.157578	14.6793	0.53288
Microspathodon chrysurus	29.3989	12.6765	0.367965	0.144876	NA	NA
Scarus coelestinus	0	0	0	0	NA	NA
Scarus coeruleus	0	0	0	0	NA	NA
Scarus guacamaia	0	0	0	0	NA	NA
Scarus iseri	59.2933	27.6556	0.577922	0.203025	15.0891	1.59349
Scarus taeniopterus	572.682	204.793	5.80736	2.47595	16.3227	1.23741
Scarus vetula	583.329	200.294	1.38528	0.434386	27.1734	1.23002
Sparisoma aurofrenatum	142.107	50.7361	1.17965	0.373526	16.5436	0.725856
Sparisoma chrysopterum	32.1212	14.0497	0.0800866	0.037615	NA	NA
Sparisoma viride	718.753	234.118	2.22078	0.674308	22.558	1.12512
Sparisoma rubripinne	4.34312	4.34312	0.021645	0.021645	NA	NA
Acanthurids	582.953	238.803	4.43741	1.79011	15.1716	0.525304
Scarids	3692.98	312.217	19.0722	2.08218	18.9234	1.08144
Total Denuders	4311.51	338.596	28.7569	3.11217	18.3521	1.0143

## Sheet: Scarid_Biomass_Trends
Year	Site	Biomass_g100m2	SE
2003	Barcadera	5644.7
2003	Eighteenth Palm	7294.5
2003	Forest	5189.3
2003	Karpata	5826.4
2003	Reef Scientifico	6037
2003	Windsock	6086
2005	Barcadera	5300
2005	Eighteenth Palm	6300
2005	Forest	6110
2005	Karpata	4000
2005	Reef Scientifico	4900
2005	Windsock	2500
2007	Barcadera	5651.17	2335.44
2007	Eighteenth Palm	4054.87	538.012
2007	Forest	1855.39	398.979
2007	Karpata	4853.15	772.726
2007	Reef Scientifico	5892.84	984.129
2007	Windsock	2893.94	441.408
2009	Barcadera	3184.85
2009	Calabas	3717.57
2009	Eighteenth Palm	3567.06
2009	Front Porch	2605.85
2009	Reef Scientifico	2841.41
2009	Windsock	4795.78
2011	Bachelor's Beach	3195.18	583.274
2011	Barcadera	3168.74	218.59
2011	Calabas	3995.62	892.507
2011	Eighteenth Palm	3020.79	288.756
2011	Forest	3112.11	507.517
2011	Front Porch	10147.9	664.618
2011	Karpata	2538.44	164.537
2011	No-Dive Reserve	1753.28	250.188
2011	Oil Slick	3618.99	645.352
2011	Reef Scientifico	2246.29	245.205
2013	Bachelor's Beach	3062.27	307.988
2013	Barcadera	3503.49	295.139
2013	Calabas	3757.49	470.887
2013	Eighteenth Palm	2707.66	277.495
2013	Forest	3157.38	401.307
2013	Front Porch	6606.26	336
2013	Karpata	3638.42	401.101
2013	No-Dive Reserve	1776.13	197.188
2013	Oil Slick	3115.67	241.993
2013	Reef Scientifico	3036.52	252.346
2013	Windsock	3321.51	268.252
2015	Bachelor's Beach	3022.06	333.274
2015	Barcadera	3252.81	315.747
2015	Calabas	2335.02	314.384
2015	Eighteenth Palm	2680.57	364.051
2015	Forest	3447.44	349.782
2015	Front Porch	1161.41	151.885
2015	Karpata	3705.6	394.049
2015	No-Dive Reserve	2587.17	201.436
2015	Oil Slick	2894.07	364.574
2015	Reef Scientifico	2897.99	298.322
2015	Windsock	2368.72	354.22
2017	Bachelor's Beach	2919.74	244.155
2017	Barcadera	4151.85	399.824
2017	Calabas	5399.14	930.418
2017	Eighteenth Palm	2746.95	183.677
2017	Forest	4540.55	512.68
2017	Front Porch	5250.74	442.396
2017	Karpata	2542.51	217.107
2017	No-Dive Reserve	3398.33	266.392
2017	Oil Slick	3530.32	363.954
2017	Reef Scientifico	2457.49	312.205
2017	Windsock	3685.12	242.086

## Sheet: Biomass trend 03-17pivot
Average of Biomass_g100m2	Year
Site	2003	2005	2007	2009	2011	2013	2015	2017	(blank)	Average Total
Bachelor's Beach					3195.18	3062.27	3022.06	2919.74		3049.81
Barcadera	5644.7	5300	5651.17	3184.85	3168.74	3503.49	3252.81	4151.85		4232.2
Calabas				3717.57	3995.62	3757.49	2335.02	5399.14		3840.97
Eighteenth Palm	7294.5	6300	4054.87	3567.06	3020.79	2707.66	2680.57	2746.95		4046.55
Forest	5189.3	6110	1855.39		3112.11	3157.38	3447.44	4540.55		3916.03
Front Porch				2605.85	10147.9	6606.26	1161.41	5250.74		5154.44
Karpata	5826.4	4000	4853.15		2538.44	3638.42	3705.6	2542.51		3872.07
No-Dive Reserve					1753.28	1776.13	2587.17	3398.33		2378.73
Oil Slick					3618.99	3115.67	2894.07	3530.32		3289.76
Reef Scientifico	6037	4900	5892.84	2841.41	2246.29	3036.52	2897.99	2457.49		3788.69
Windsock	6086	2500	2893.94	4795.78		3321.51	2368.72	3685.12		3664.44
(blank)
Average Total	6012.98	4851.67	4200.23	3452.09	3679.74	3425.71	2759.35	3692.98		3829.22
	288.507	581.38	648.645	318.835	747.305	356.454	205.396	312.217

## Sheet: Scarid_Density_Trends
Year	Site	Density _indv/100m2	SE
2003	Barcadera	24.3333
2003	Reef Scientifico	23
2003	Karpata	21.4286
2003	Forest	22.8
2003	Eighteenth Palm	25.3333
2003	Windsock	23.6667
2003	Bonaire Average	23.427	0.550217
2005	Reef Scientifico	25
2005	Barcadera	13
2005	Karpata	17.5
2005	Forest	24.25
2005	Eighteenth Palm	23
2005	Windsock	13.67
2005	Bonaire Average	19.4033	2.20034
2009	Windsock	7.91
2009	Eighteenth Palm	11.87
2009	Calabas	10.11
2009	Front Porch	8.85
2009	Reef Scientifico	9.69
2009	Barcadera	6.04
2009	Bonaire Average	9.07833	0.814053
2011	Bonaire Average	10.5799	1.32344
2011	Bachelor's Beach	10.8333	1.76777
2011	Barcadera	7.39583	0.399575
2011	Calabas	11.7708	3.08782
2011	Eighteenth Palm	10	1.81621
2011	Forest	11.25	1.24004
2011	Front Porch	21.1458	0.817369
2011	Karpata	7.29167	0.343231
2011	No-Dive Reserve	10.6944	1.51255
2011	Oil Slick	9.47917	1.12398
2011	Reef Scientifico	5.9375	0.618769
2013	Bonaire Average	11.5225	0.922245
2013	Bachelor's Beach	9.72222	0.94199
2013	Barcadera	8.24074	0.426831
2013	Calabas	13.7037	1.53478
2013	Eighteenth Palm	11.5	1.38221
2013	Forest	12.1667	1.13312
2013	Front Porch	19.2708	2.1561
2013	Karpata	11.0185	1.17669
2013	No-Dive Reserve	8.33333	0.680414
2013	Oil Slick	10.625	0.751157
2013	Reef Scientifico	9.91667	0.770301
2013	Windsock	12.25	1.13889
2015	Bonaire Average	9.31334	0.529329
2015	Bachelor's Beach	10.6667	0.976578
2015	Barcadera	8.83333	0.853461
2015	Calabas	9.25	0.864688
2015	Eighteenth Palm	8.95833	1.07679
2015	Forest	11.8333	1.57037
2015	Front Porch	4.89583	0.457453
2015	Karpata	9.91667	0.916667
2015	No-Dive Reserve	10.4167	1.00347
2015	Oil Slick	8.66667	1.1399
2015	Reef Scientifico	10.0926	0.527859
2015	Windsock	8.91667	0.724888
2017	Bonaire Average	19.0722	2.08218
2017	Bachelor's Beach	16.4286	1.56129
2017	Barcadera	17.0238	1.65529
2017	Calabas	12.3333	1.56791
2017	Eighteenth Palm	17.0238	1.86212
2017	Forest	36.7857	5.75465
2017	Front Porch	18.3333	2.6571
2017	Karpata	26.6667	2.55883
2017	No-Dive Reserve	18.8889	1.17195
2017	Oil Slick	17.1429	1.86212
2017	Reef Scientifico	14.4048	1.53997
2017	Windsock	14.7619	1.25613

## Sheet: Species List
Code	Common Name	Scientific Name	Family	Functional Feeding Group	a	b	Benthic / Pelagic	Trophic Level	Trophic level s.e.	Column1	L-W citation
3sD	3-spot Damselfish	Stegastes planifrons	Pomacentridae	Omnivores	0.02188	2.96	Benthic	3.3	0.3
BaL	Balloon Fish	Diodon holocanthus	Diodontidae	Carnivores	0.04365	2.87	Benthic	3.9	0.2			Changed to Fit Fishbase
BdB	Banded Butterflyfish	Chaetodan striatus	Chaetodontidae	Carnivores	0.02239	3.03	Benthic	3.2	0.43
BaJ	Bar Jack	Caranx ruber	Carangidae	Carnivores	0.01698	2.95	Pelagic	4.4	0.77			Already matched fishbase
BaR	Barracuda	Sphyraena barracuda	Sphyraenidae	Carnivores	0.00832	2.93	Pelagic	4.5	0.6
HaM	Hamlet spp.	Hypoplectrus puella	Serranidae	Carnivores	0.01778	3.03	Benthic	3.7	0.4
BgD	Beaugregory	Stegastes leucostictus	Pomacentridae	Omnivores	0.01995	2.95	Benthic	3.1	0.2
Beef	Bermuda Chub	Kyphosus sectatrix	Kyphosidae	Herbivores	0.01202	3.02	Benthic	2	0		used parameter values from K. bosquii: http://www.fishbase.org/summary/67625
BiD	Bicolour Damselfish	Stegastes partitus	Pomacentridae	Herbivores	0.01479	3.01	Benthic	2	0
NgM	Black Durgon	Melichthys niger	Balistidae	Omnivores	0.02344	2.95	Benthic	2.4	0.28
BlM	Black Margate	Anisotremus surinamensis	Haemulidae	Carnivores	0.0166	3.05	Benthic	3.6	0.2
BlB	Blackbar soldierfish	Myripristis jacobus	Holocentridae	Carnivores	0.01202	3.06	Benthic	3.6	0.56
BlC	Blue Chromis	Chromis cyanea	Pomacentridae	Planktivore	0.01479	2.98	Benthic	3	0
BlP	Blue Parrotfish	Scarus coeruleus	Scaridae	Herbivores	-5.0162	3.1109	Benthic	2	0
BlG	Blue Stripped Grunt	Haemulon sciurus	Haemulidae	Carnivores	0.01549	2.98	Benthic	3.4	0.47
BlT	Blue Tang	Acanthurus coeruleus	Acanthuridae	Herbivores	-2.8242	2.2638	Benthic	2	0.03
BhW	Bluehead Wrasse	Thalassoma bifasciatum	Labridae	Carnivores	0.00891	3.01	Benthic	3.3	0.1
BrC	Brown Chromis	Chromis multilineata	Pomacentridae	Planktivore	0.01479	2.98	Benthic	3	0
BtP	Bucktooth parrotfish	Sparisoma radians	Scaridae	Herbivores	0.00955	3.05	Benthic	2	0
CsG	Caesar Grunt	Haemulon carbonarium	Haemulidae	Carnivores	0.01738	2.98	Benthic	3.2	0.49
PuF	Caribbean sharp-nose puffer	Canthigaster rostrata	Tetraodontidae	Omnivores	0.02239	2.96	Benthic	3	0.38
ClW	Clown Wrasse	Halichoeres maculipinna	Labridae	Carnivores	0.01047	3.2	Benthic	3.3	0.2
CoN	Coney	Cephalopholis fulva	Serranidae	Carnivores	0.01	3.02	Benthic	4	0.7
CrF	Creole Fish	Paranthias furcifer	Serranidae	Carnivores	0.0135	3.043	Benthic	3.2	0.1
CrW	Creole Wrasse	Clepticus parrae	Labridae	Planktivore	0.00955	3.05	Benthic	3.4	0.2
CuS	Cubera Snapper	Lutjanus cyanopterus	Lutjanidae	Carnivores	0.0151	3.0601	Benthic	4.4	0.5		http://www.agrra.org/wp-content/uploads/2016/08/AppendixTwo7-22-03F.pdf
DcF	Doctorfish	Acanthurus chirurgus	Acanthuridae	Herbivores	-2.4262	2.0768	Benthic	2	0.02
DgS	Dog Snapper	Lutjanus jocu	Lutjanidae	Carnivores	0.01514	2.98	Benthic	4.4	0.03
4eB	Foureye Butterflyfish	Chaetodon capistratus	Chaetodontidae	Carnivores	0.02512	3.1	Benthic	3	0.44
FrA	French Angelfish	Pomacanthus paru	Pomacanthidae	Carnivores	0.0309	2.95	Benthic	2.8	0
FrG	French Grunt	Haemulon flavolineatum	Haemulidae	Carnivores	0.01349	3	Benthic	3.3	0.41
GeS	Glass Eye Snapper	Heteropriacanthus cruentatus	Priacanthidae	Carnivores	0.01738	2.9	Benthic	3.8	0.47
GtF	Goatfish	Mulloidichthys martinicus	Mullidae	Carnivores	0.00977	3.12	Benthic	3.5	0.37
GoM	Goldentail Moray	Gymnothorax miliaris	Muraenidae	Carnivores	0.00186	3.07	Benthic	3.9	0.63
GrB	Graysby	Cephalopholis cruentata	Serranidae	Carnivores	0.01122	3.07	Benthic	4.2	0.74
HoG	Hogfish	Lachnolaimus maximus	Labridae	Carnivores	0.02188	2.98	Benthic	4.2	0
HrT	Honeycomb Cowfish	Acanthostracion polygonia	Ostraciidae	Omnivores	0.02818	2.83	Benthic	2	0
Jack	Horse-eye Jack	Caranx latus	Carangidae	Carnivores	0.02188	2.95	Pelagic	4.2	0.4
InL	Inshore Lizardfish	Synodus foetens	Synodontidae	Carnivores	0.0038	3.21	Benthic	4.5	0
JoP	Jolthead Porgy	Calamus bajonado	Sparidae	Carnivores	0.02818	2.9	Benthic	3.5	0.2
LnS	Lane Snapper	Lutjanus synagris	Lutjanidae	Carnivores	0.01445	2.97	Benthic	3.8	0.62
Lion	Lionfish	Pterois sp.	Scorpaenidae	Carnivores	0.01148	3.09	Benthic	4.4	0.79
LzF	Lizardfish	Synodus intermedius	Synodontidae	Carnivores	0.0038	3.21	Benthic	4.2	0.72
LgD	Longfin Damselfish	Stegastes diencaeus	Pomacentridae	Herbivores	0.01995	2.99	Benthic	2	0
LsB	Longsnout Butterflyfish	Chaetodon aculeatus	Chaetodontidae	Carnivores	0.02188	3.02	Benthic	3.4	0.2
LsS	Longspine squirrelfish	Holocentrus rufus	Holocentridae	Carnivores	0.01148	2.89	Benthic	3.5	0.4
MgS	Mahogany Snapper	Lutjanus mahogoni	Lutjanidae	Carnivores	0.01698	2.96	Benthic	4.4	0.75
MdP	Midnight Parrotfish	Scarus coelestinus	Scaridae	Herbivores	-4.8764	3.0618	Benthic	2	0
MuS	Mutton Snapper	Lutjanus analis	Lutjanidae	Carnivores	0.01318	2.97	Benthic	3.9	0.2
OcS	Ocean Surgeonfish	Acanthurus bahianus	Acanthuridae	Herbivores	-4.6005	2.9752	Benthic	2	0
OrF	Orangespotted Filefish	Cantherhines pullus	Monacanthidae	Omnivores	0.02291	2.87	Benthic	2.6	0.19
PcF	Peacock Flounder	Bothus lunatus	Bothidae	Carnivores	0.01047	3.05	Benthic	4.4	0.78
PqF	Porcupinefish	Diodon hystrix	Diodontidae	Carnivores	0.06607	2.84	Benthic	3.7	0
PrP	Princess Parrotfish	Scarus taeniopterus	Scaridae	Herbivores	-3.2257	2.3852	Benthic	2	0
PuD	Puddingwife	Halichoeres radiatus	Labridae	Carnivores	0.0131	3.038	Benthic	3.3	0.44		used parameter values from H. brasiliensis: http://citeseerx.ist.psu.edu/viewdoc/download?doi=10.1.1.583.7856&rep=rep1&type=pdf
QuA	Queen Angelfish	Holacanthus ciliaris	Pomacanthidae	Omnivores	0.0309	2.89	Benthic	3	0
QuP	Queen Parrotfish	Scarus vetula	Scaridae	Herbivores	-5.0162	3.1109	Benthic	2	0.08
RnP	Rainbow Parrotfish	Scarus guacamaia	Scaridae	Herbivores	-4.8714	3.0626	Benthic	2	0
ReH	Red Hind	Epinephelus guttatus	Serranidae	Carnivores	0.01148	3.04	Benthic	3.8	0.3
RdP	Redband Parrotfish	Sparisoma aurofrenatum	Scaridae	Herbivores	-4.0781	2.7438	Benthic	2	0.06
RtP	Redtail Parrotfish	Sparisoma chrysopterum	Scaridae	Herbivores	-3.0509	2.3192	Benthic	2	0
RcB	Rock Beauty	Holacanthus tricolour	Pomacanthidae	Omnivores	0.03388	2.91	Benthic	2.6	0.33
RoH	Rock Hind	Epinephelus ascensionis	Serranidae	Carnivores	0.01349	3.09	Benthic	3.5	0.4
SlC	Sailors Choice	Haemulon parra	Haemulidae	Carnivores	0.01288	3.02	Benthic	3.5	0.2
ScH	Schoolmaster	Lutjanus apodus	Lutjanidae	Carnivores	0.01413	2.98	Benthic	4.2	0.72
StF	Scorpionfish	Scorpaena plumieri	Scorpaenidae	Carnivores	0.01514	2.99	Benthic	3.8	0.55
ScF	Scrawled Filefish	Aluterus scriptus	Monacanthidae	Omnivores	0.823	1.8136	Benthic	2.8	0.45		http://www.agrra.org/wp-content/uploads/2016/08/AppendixTwo7-22-03F.pdf
SgM	Sergeant Major	Abudefduf saxatilis	Pomacentridae	Carnivores	0.0182	3.05	Benthic	3.8	0.2
Seel	Sharptail Eel	Myrichthys breviceps	Ophichthidae	Carnivores	0.00151	2.91	Benthic	3.5	0.5
SlV	Silverfish	Gerres sp.	Gerreidae	Carnivores	0.01202	3.07	Benthic	3.4	0		used parameters from G. oblongus: http://www.fishbase.org/summary/5801
SlD	Slippery Dick	Halichoeres bivittatus	Labridae	Carnivores	0.00933	3.06	Benthic	3.3	0.46
SmG	Smallmouth Grunt	Haemulon chrysargyreum	Haemulidae	Carnivores	0.01259	2.99	Benthic	3.2	0.39
SmT	Smooth Trunkfish	Lactophyrs triqueter	Ostraciidae	Omnivores	0.04898	2.78	Benthic	3.3	0.2
Soap	Soapfish	Rypticus saponaceus	Serranidae	Carnivores	0.01148	3.06	Benthic	4.1	0.5
SpH	Spanish Hogfish	Bodianus rufus	Labridae	Carnivores	0.0144	3.0532	Benthic	3.4	0.49		http://www.agrra.org/wp-content/uploads/2016/08/AppendixTwo7-22-03F.pdf
SpB	Spotfin Butterflyfish	Chaetodon ocellatus	Chaetodontidae	Carnivores	0.0257	3.02	Benthic	3.7	0.2
SpD	Spotted Drum	Equetus punctatus	Sciaenidae	Carnivores	0.00832	3.09	Benthic	3.5	0.3
QuM	Spotted Goatfish	Pseudupeneus maculatus	Mullidae	Carnivores	0.01	3.12	Benthic	3.5	0.53
SpM	Spotted Moray	Gymnothorax moringa	Muraenidae	Carnivores	0.00091	3.12	Benthic	4.5	0.8
SpT	Spotted Trunkfish	Lactophrys bicaudalis	Ostraciidae	Omnivores	0.049	2.78	Benthic	3	0.25		Used parameter values fron L. triqueter (Fishbase)
SqF	Squirrel Fish	Holocentrus adsensionis	Holocentridae	Carnivores	0.01585	2.97	Benthic	3.5	0.57
StoP	Stoplight Parrotfish	Sparisoma viride	Scaridae	Herbivores	-4.4317	2.9051	Benthic	2	0.02
StrP	Striped Parrotfish	Scarus iseri	Scaridae	Herbivores	-4.8887	3.0548	Benthic	2	0
TaR	Tarpon	Megalops atlanticus	Megalopidae	Carnivores	0.00794	2.98	Pelagic	4.5	0
TgG	Tiger Grouper	Mycteroperca tigris	Serranidae	Carnivores	0.01122	3.06	Benthic	4.5	0.8
ToM	Tomate	Haemulton aurolineatum	Haemulidae	Carnivores	0.01514	2.99	Benthic	4.4	0
TrF	Trumpet Fish	Aulostomus maculatus	Aulostomidae	Carnivores	0.0001	3.554	Benthic	4.3	0.73		https://www.pifsc.noaa.gov/library/pubs/admin/PIFSC_Admin_Rep_13-04.pdf
WhG	White Grunt	Haemulon plumieri	Haemulidae	Carnivores	0.01479	2.98	Benthic	3.6	0.48
WhM	White Margate	Haemulon album	Haemulidae	Carnivores	0.01259	2.99	Benthic	3.3	0.1
WhF	Whitespotted Filefish	Cantherhines macrocerus	Monacanthidae	Carnivores	0.02291	2.89	Benthic	3	0.16
YeJ	Yellow Jack	Carangoides bartholomaei	Carangidae	Carnivores	0.02188	2.93	Pelagic	4.5	0.2
YfM	Yellowfin Mojarra	Gerres cinereus	Gerreidae	Carnivores	0.01148	3.07	Benthic	3.2	0.2
YhW	Yellowhead Wrasse	Halichoeres garnoti	Labridae	Carnivores	0.01	3.13	Benthic	3.5	0.54
YtD	Yellowtail Damselfish	Microspathodon chrysurus	Pomacentridae	Herbivores	-4.7033	3.0825	Benthic	2.1	0.15
YtP	Yellowtail parrotfish	Sparisoma rubripinne	Scaridae	Herbivores	-4.8701	3.0641	Benthic	2	0
YtS	Yellowtail Snapper	Ocyurus chrysurus	Lutjanidae	Carnivores	0.01479	2.95	Pelagic	4	0.67

## Sheet: Species equation Table
Appendix X. Herbivorous fish species list and length-weight conversion parameters
Scientific Name	Common Name	Family	a	b
Acanthurus coeruleus	Blue Tang	Acanthuridae	-2.8242	2.2638
Acanthurus chirurgus	Doctorfish	Acanthuridae	-2.4262	2.0768
Acanthurus bahianus	Ocean Surgeonfish	Acanthuridae	-4.6005	2.9752
Microspathodon chrysurus	Yellowtail Damselfish	Pomacentridae	-4.7033	3.0825
Scarus coeruleus	Blue Parrotfish	Scaridae	-5.0162	3.1109
Sparisoma radians	Bucktooth parrotfish	Scaridae	0.00955	3.05
Scarus coelestinus	Midnight Parrotfish	Scaridae	-4.8764	3.0618
Scarus taeniopterus	Princess Parrotfish	Scaridae	-3.2257	2.3852
Scarus vetula	Queen Parrotfish	Scaridae	-5.0162	3.1109
Scarus guacamaia	Rainbow Parrotfish	Scaridae	-4.8714	3.0626
Sparisoma aurofrenatum	Redband Parrotfish	Scaridae	-4.0781	2.7438
Sparisoma chrysopterum	Redtail Parrotfish	Scaridae	-3.0509	2.3192
Sparisoma viride	Stoplight Parrotfish	Scaridae	-4.4317	2.9051
Scarus iseri	Striped Parrotfish	Scaridae	-4.8887	3.0548
Sparisoma rubripinne	Yellowtail parrotfish	Scaridae	-4.8701	3.0641
